# Supplementary material for: Brønsted acid and Lewis acid co-promoted cascade cyclization reaction and application to the total synthesis of Erysotramidine
Source: Royal Society of Chemistry journal article supplement (doi:10.1039/d1qo00668a), 2021-01-01

## *Supporting Information*

### **Brønsted acid and Lewis acid co-promoted Cascade Cyclization**

#### **Reaction and Application to Total Synthesis of Erysotramidine**

Xiaolin Ju<sup>#</sup>, Xiaojun Hu<sup>#</sup>, Hongliang Shi, Shiqiang Ma, Feifei He, Xiaolei Wang, Xingang Xie, and Xuegong She\*

*State Key Laboratory of Applied Organic Chemistry, College of Chemistry and Chemical Engineering, Lanzhou University, Lanzhou 730000, China*

\*E-mail: [shexg@lzu.edu.cn](mailto:shexg@lzu.edu.cn)

#### **Contents:**

|                                                                       |           |
|-----------------------------------------------------------------------|-----------|
| <b>1. General information .....</b>                                   | <b>2</b>  |
| <b>2. Preparation and characterization of starting materials.....</b> | <b>3</b>  |
| <b>3. General procedure for the cascade cyclization reaction.....</b> | <b>13</b> |
| <b>4. Characterization data for the products .....</b>                | <b>15</b> |
| <b>5. Total Synthesis of Erysotramidine.....</b>                      | <b>20</b> |
| <b>6. References .....</b>                                            | <b>29</b> |
| <b>7. NMR Spectra of New Compounds .....</b>                          | <b>30</b> |

## 1. General information

Solvents were purified and dried by standard methods prior to use. All commercially available reagents were used without further purification unless otherwise noted. Oxygen-sensitive and moisture-sensitive reactions were carried out under argon atmosphere. Column chromatography was generally performed on silica gel (200-300 mesh) and reactions were monitored by thin layer chromatography (TLC) using silica gel GF254 plates with UV light to visualize the course of reaction.

High-resolution mass spectral analysis (HRMS) data were measured on a Bruker APEXII mass spectrometer by means of the electrospray ionization (ESI) technique.  $^1\text{H}$  NMR and  $^{13}\text{C}$  NMR spectra were recorded on 400MHz and 600 MHz spectrometers. Chemical shifts are reported as  $\delta$  values relative to internal chloroform ( $\delta$  7.26 for  $^1\text{H}$  NMR and 77.0 for  $^{13}\text{C}$  NMR) or relative to internal tetramethylsilane ( $\delta$  0.0 for  $^1\text{H}$  NMR). Substrates were purchased from TCI, Energy Chemical or Alfa Aesar and used as received. Oil bath was used as heat source for reactions above room temperature.

## 2. Preparation and characterization of starting materials

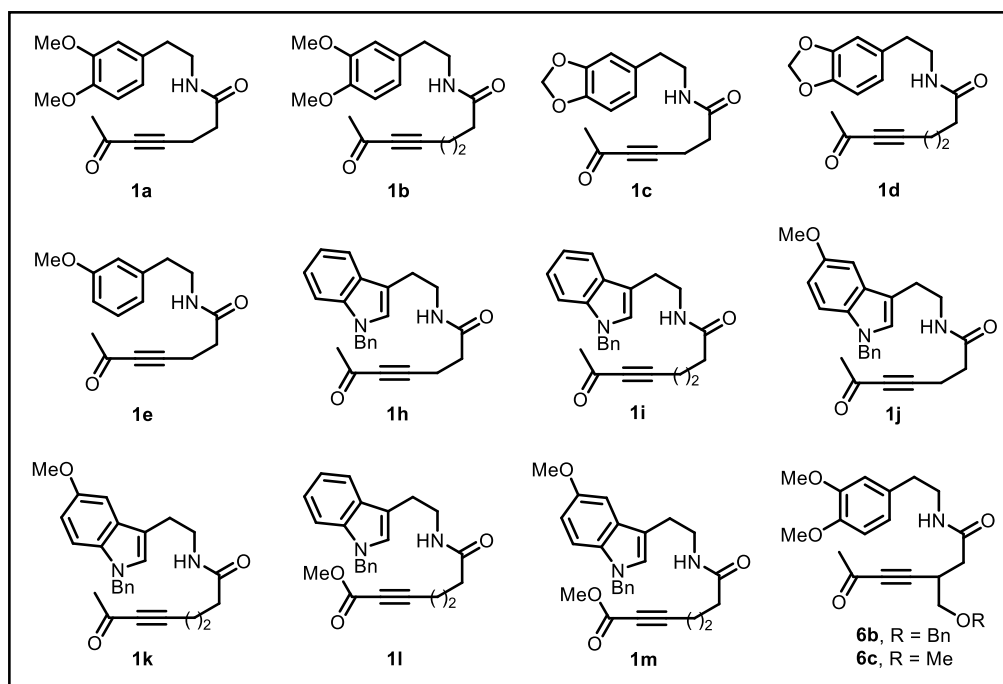

Figure. SI-1 Prepared substrates

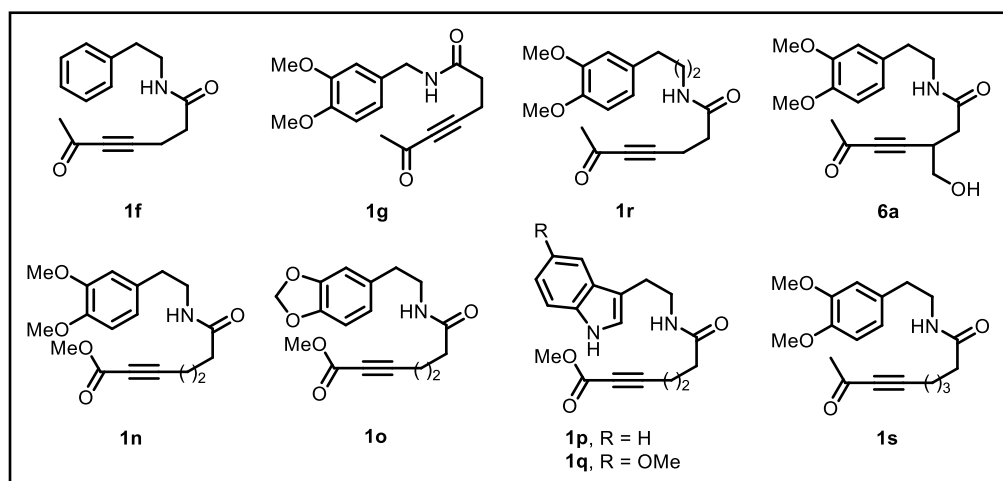

Figure. SI-2 Failed substrates

## General procedure for the substrates **1a-g** and **1r-s**:

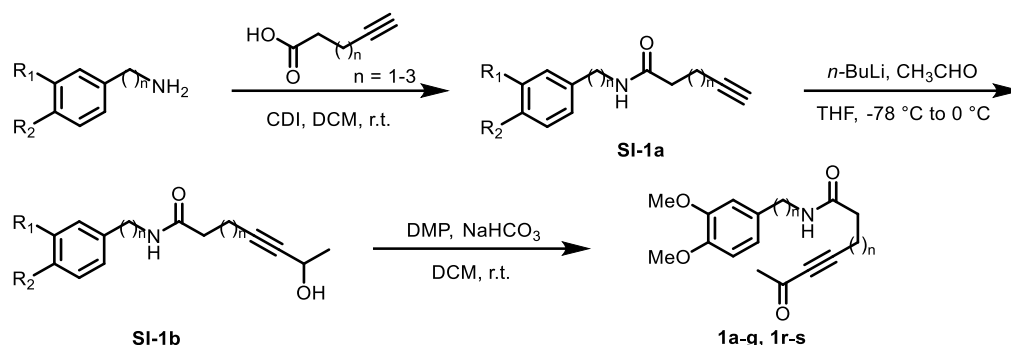

A mixture of alkyne acid (10.0 mmol, 1.0 equiv.) and CDI (12.0 mmol, 1.2 equiv.) in DCM (50 mL) was stirred at room temperature for 0.5 h. Then phenylamine (15.0 mmol, 1.5 equiv.) was added to the mixture, the reaction was stirred at room temperature until completion (monitored by TLC). The solvent was evaporated under reduced pressure and the residue was purified through silica gel column chromatography (petroleum ether/ethyl acetate, 1/1) to afford **SI-1a**, yield 93-97%.

The compound **SI-1a** (4.1 mmol, 1.0 equiv.) was dissolved in THF (40 mL) under Ar,  $n$ -BuLi in hexane (2.5 M, 8.2 mmol, 2.1 equiv.) was added to the solution dropwise at  $-78^\circ\text{C}$ . Then added  $\text{CH}_3\text{CHO}$  (20.5 mmol, 5.0 equiv.) to the mixture after 0.5 h, and the reaction was raised to the room temperature after another 0.5 h, the mixture was stirred at this temperature for 12 h. Quenched with saturated  $\text{NH}_4\text{Cl}$  aqueous, the mixture was diluted with water and extracted with EtOAc, washed with brine, dried over anhydrous sodium sulfate and concentrated under reduced pressure. The residue was purified by silica gel column chromatography (petroleum ether/ethyl acetate, 1/1; petroleum ether/ethyl acetate/DCM/MeOH, 10/10/10/1) to afford **SI-1b**, yield 52-63%, brsm 91-97%.

The compound **SI-1b** (2.5 mmol, 1.0 equiv.) was dissolved in DCM (25 mL),  $\text{NaHCO}_3$  (7.6 mmol, 3.0 equiv.) and DMP (3.8 mmol, 1.5 equiv.) was added to the reaction and the mixture was stirred at room temperature until completion (monitored by TLC). Then  $\text{Na}_2\text{S}_2\text{O}_3$  aqueous was added to the mixture and stirred until the solution was clear, the mixture was diluted with water and extracted with EtOAc, washed with brine, dried over anhydrous sodium sulfate and concentrated under reduced pressure. The residue was purified by silica gel column chromatography (petroleum ether/ethyl acetate, 1/1) to afford **1a-g** and **1r-s**, yield 87-92%.

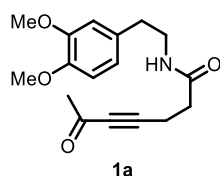

**Substrate *N*-(3,4-dimethoxyphenethyl)-6-oxohept-4-ynamide (**1a**)** was obtained as a white solid. Mp:  $72-73^\circ\text{C}$ .  $^1\text{H NMR}$  (400 MHz,  $\text{CDCl}_3$ )  $\delta$  6.81 (d,  $J = 8.4$  Hz, 1H), 6.73 (d,  $J = 6.8$  Hz, 2H), 5.63 (s, 1H), 3.87 (s, 3H), 3.87 (s, 3H), 3.52 (q,  $J = 6.8$  Hz, 2H), 2.77 (t,  $J = 7.2$  Hz, 2H), 2.70 (t,  $J = 7.2$  Hz, 2H), 2.39 (t,  $J = 7.2$  Hz, 2H),



2.30 (s, 3H);  $^{13}\text{C}$  NMR (101 MHz,  $\text{CDCl}_3$ )  $\delta$  184.6, 170.0, 149.1, 147.7, 131.1, 120.6, 111.8, 111.4, 91.8, 81.6, 55.9, 55.9, 40.8, 35.2, 34.3, 32.6, 15.1; **HRMS ESI** Calcd for  $\text{C}_{17}\text{H}_{21}\text{NO}_4$   $[\text{M}+\text{H}]^+$ : 304.1543, Found: 304.1544.

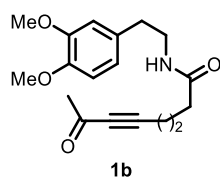

**Substrate *N*-(3,4-dimethoxyphenethyl)-7-oxooct-5-ynamide (1b)** was obtained as a colorless oil.  $^1\text{H}$  NMR (400 MHz,  $\text{CDCl}_3$ )  $\delta$  6.77 (d,  $J = 8.8$  Hz, 1H), 6.68 (d,  $J = 6.0$  Hz, 2H), 5.77 (s, 2H), 3.82 (s, 3H), 3.81 (s, 3H), 3.45 (q,  $J = 6.8$  Hz, 2H), 2.72 (t,  $J = 6.8$  Hz, 2H), 2.36 (t,  $J = 6.8$  Hz, 2H), 2.26 (s, 3H), 2.21 (t,  $J = 7.2$  Hz, 2H), 1.88 – 1.81 (m, 2H);  $^{13}\text{C}$  NMR (101 MHz,  $\text{CDCl}_3$ )  $\delta$  184.7, 171.6, 148.9, 147.5, 131.1, 120.5, 111.7, 111.2, 92.7, 81.7, 55.8, 55.7, 40.5, 35.1, 34.7, 32.6, 23.3, 18.1; **HRMS ESI** Calcd for  $\text{C}_{18}\text{H}_{23}\text{NO}_4$   $[\text{M}+\text{H}]^+$ : 318.1700, Found: 318.1699.

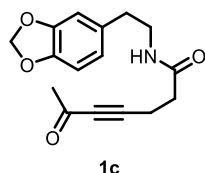

**Substrate *N*-(2-(benzo[d][1,3]dioxol-5-yl)ethyl)-6-oxohept-4-ynamide (1c)** was obtained as a white solid. Mp: 81–82 °C.  $^1\text{H}$  NMR (400 MHz,  $\text{CDCl}_3$ )  $\delta$  6.71 (d,  $J = 7.6$  Hz, 1H), 6.65 (s, 1H), 6.60 (d,  $J = 6.8$  Hz, 1H), 5.90 (s, 2H), 5.87 (s, 1H), 3.44 (q,  $J = 6.4$  Hz, 2H), 2.70 (t,  $J = 6.8$  Hz, 2H), 2.66 (t,  $J = 7.2$  Hz, 2H), 2.38 (t,  $J = 7.6$  Hz, 2H), 2.27 (s, 3H).  $^{13}\text{C}$  NMR (101 MHz,  $\text{CDCl}_3$ )  $\delta$  184., 170.1, 147.7, 146.1, 132.3, 121.5, 108.9, 108.3, 100.8, 92.0, 81.4, 40.8, 35.2, 34.1, 32.6, 15.0; **HRMS ESI** Calcd for  $\text{C}_{16}\text{H}_{17}\text{NO}_4$   $[\text{M}+\text{H}]^+$ : 288.1230, Found: 288.1231.

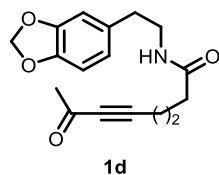

**Substrate *N*-(2-(benzo[d][1,3]dioxol-5-yl)ethyl)-7-oxooct-5-ynamide (1d)** was obtained as a colorless oil.  $^1\text{H}$  NMR (400 MHz,  $\text{CDCl}_3$ )  $\delta$  6.74 (d,  $J = 7.6$  Hz, 1H), 6.67 (d,  $J = 1.6$  Hz, 1H), 6.63 (d,  $J = 8.0$  Hz, 1H), 5.94 (s, 2H), 5.61 (s, 1H), 3.47 (q,  $J = 6.4$  Hz, 2H), 2.72 (t,  $J = 6.8$  Hz, 2H), 2.41 (t,  $J = 6.8$  Hz, 2H), 2.31 (s, 1H), 2.25 (t,  $J = 7.2$  Hz, 2H), 1.92 – 1.85 (m, 2H);  $^{13}\text{C}$  NMR (101 MHz,  $\text{CDCl}_3$ )  $\delta$  184.9, 171.6, 147.9, 146.2, 132.5, 121.6, 109.0, 108.4, 100.9, 92.8, 81.9, 40.7, 35.4, 34.8, 32.8, 23.3, 18.3; **HRMS ESI** Calcd for  $\text{C}_{17}\text{H}_{19}\text{NO}_4$   $[\text{M}+\text{H}]^+$ : 302.1387, Found: 302.1388.

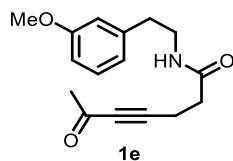

**Substrate *N*-(3-methoxyphenethyl)-6-oxohept-4-ynamide (1e)** was obtained as

a white solid. Mp: 61-62 °C.  $^1\text{H NMR}$  (400 MHz,  $\text{CDCl}_3$ )  $\delta$  7.22 (t,  $J = 8.0$  Hz, 1H), 6.77 (dd,  $J = 8.0, 2.4$  Hz, 2H), 6.73 (s, 1H), 5.88 (s, 1H), 3.79 (s, 3H), 3.52 (q,  $J = 6.8$  Hz, 2H), 2.80 (t,  $J = 7.2$  Hz, 2H), 2.69 (t,  $J = 7.2$  Hz, 2H), 2.40 (t,  $J = 7.6$  Hz, 2H), 2.30 (s, 3H);  $^{13}\text{C NMR}$  (101 MHz,  $\text{CDCl}_3$ )  $\delta$  184.7, 170.0, 159.7, 140.2, 129.6, 120.9, 114.4, 111.6, 92.0, 81.4, 55.1, 40.5, 35.5, 34.1, 32.6, 15.0; **HRMS ESI** Calcd for  $\text{C}_{16}\text{H}_{19}\text{NO}_3$   $[\text{M}+\text{H}]^+$ : 274.1438, Found: 274.1436.

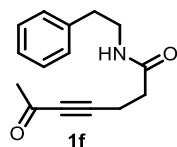

**Substrate 6-oxo-*N*-phenethylhept-4-ynamide (1f)** was obtained as a colorless oil.  $^1\text{H NMR}$  (400 MHz,  $\text{CDCl}_3$ )  $\delta$  7.36 – 7.29 (m, 4H), 7.29 – 7.24 (m, 1H), 5.90 (s, 1H), 5.13 (p,  $J = 7.2$  Hz, 1H), 2.70 (t,  $J = 7.6$  Hz, 2H), 2.46 – 2.38 (m, 2H), 2.26 (s, 3H), 1.49 (d,  $J = 6.8$  Hz, 3H);  $^{13}\text{C NMR}$  (101 MHz,  $\text{CDCl}_3$ )  $\delta$  186.6, 169.6, 143.4, 128.7, 127.5, 126.1, 91.9, 81.6, 49.0, 34.4, 32.7, 21.7, 15.2; **HRMS ESI** Calcd for  $\text{C}_{15}\text{H}_{17}\text{NO}_2$   $[\text{M}+\text{H}]^+$ : 244.1332, Found: 244.1331.

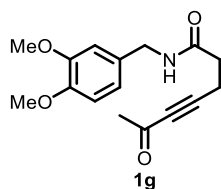

**Substrate *N*-(3,4-dimethoxybenzyl)-6-oxohept-4-ynamide (1g)** was obtained as a colorless oil.  $^1\text{H NMR}$  (400 MHz,  $\text{CDCl}_3$ )  $\delta$  6.84 – 6.79 (m, 3H), 6.34 (t,  $J = 6.0$  Hz, 1H), 4.36 (d,  $J = 5.6$  Hz, 2H), 3.85 (s, 6H), 2.72 (t,  $J = 7.6$  Hz, 2H), 2.47 (t,  $J = 7.6$  Hz, 2H), 2.28 (s, 1H);  $^{13}\text{C NMR}$  (101 MHz,  $\text{CDCl}_3$ )  $\delta$  184.9, 170.1, 149.0, 148.4, 130.6, 120.1, 111.2, 111.1, 92.1, 81.6, 55.9, 55.9, 43.6, 34.2, 32.7, 15.2; **HRMS ESI** Calcd for  $\text{C}_{16}\text{H}_{19}\text{NO}_4$   $[\text{M}+\text{H}]^+$ : 290.1387, Found: 290.1386.

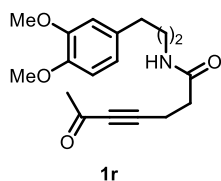

**Substrate *N*-(3-(3,4-dimethoxyphenyl)propyl)-6-oxohept-4-ynamide (1r)** was obtained as a colorless oil.  $^1\text{H NMR}$  (400 MHz,  $\text{CDCl}_3$ )  $\delta$  6.79 (d,  $J = 8.4$  Hz, 1H), 6.72 – 6.69 (m, 2H), 5.86 (s, 1H), 3.87 (s, 3H), 3.85 (s, 3H), 3.30 (q,  $J = 7.2$  Hz, 2H), 2.70 (t,  $J = 7.6$  Hz, 2H), 2.60 (t,  $J = 7.6$  Hz, 2H), 2.40 (t,  $J = 7.6$  Hz, 2H), 2.29 (s, 3H), 1.82 (p,  $J = 7.6$  Hz, 2H);  $^{13}\text{C NMR}$  (101 MHz,  $\text{CDCl}_3$ )  $\delta$  184.6, 170.0, 148.8, 147.2, 133.9, 120.1, 111.6, 111.2, 92.0, 81.5, 55.8, 55.7, 39.2, 34.2, 32.7, 32.6, 31.2, 15.1; **HRMS ESI** Calcd for  $\text{C}_{18}\text{H}_{23}\text{NO}_4$   $[\text{M}+\text{H}]^+$ : 318.1700, Found: 318.1699.

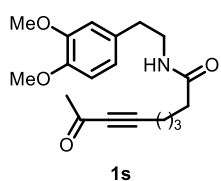

**Substrate *N*-(3,4-dimethoxyphenethyl)-8-oxonon-6-ynamide (1s)** was obtained as a colorless oil. <sup>1</sup>H NMR (400 MHz, CDCl<sub>3</sub>) δ 6.81 (d, *J* = 8.4 Hz, 1H), 6.73 (dd, *J* = 5.2, 2.0 Hz, 2H), 5.78 (s, 1H), 3.86 (s, 3H), 3.86 (s, 3H), 3.50 (q, *J* = 6.8 Hz, 2H), 2.76 (t, *J* = 7.2 Hz, 2H), 2.37 (t, *J* = 6.8 Hz, 2H), 2.31 (s, 3H), 2.17 (t, *J* = 7.6 Hz, 2H), 1.73 (p, *J* = 7.6 Hz, 2H), 1.62 – 1.55 (m, 2H); <sup>13</sup>C NMR (101 MHz, CDCl<sub>3</sub>) δ 184.8, 172.2, 148.9, 147.5, 131.2, 120.5, 111.8, 111.2, 93.3, 81.5, 77.2, 55.8, 55.7, 40.5, 35.7, 35.1, 32.6, 26.9, 24.7, 18.6; **HRMS ESI** Calcd for C<sub>19</sub>H<sub>25</sub>NO<sub>4</sub> [M+H]<sup>+</sup>: 332.1857, Found: 332.1859.

### General procedure for the substrates 1h-k:

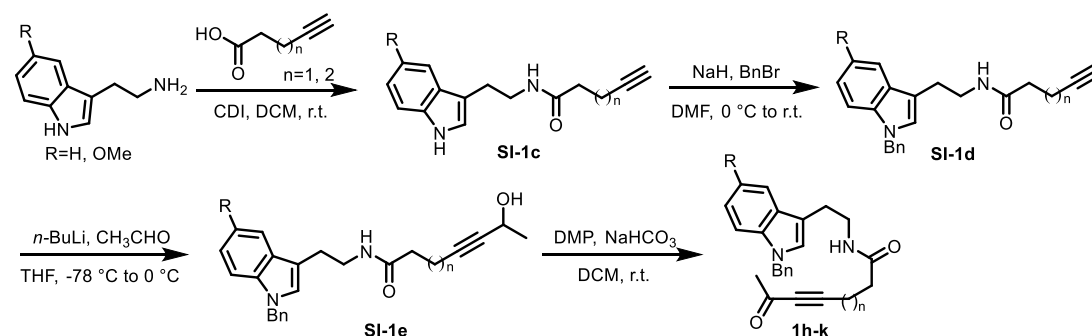

A mixture of alkyne acid (3.0 mmol, 1.0 equiv.) and CDI (3.6 mmol, 1.2 equiv.) in DCM (30 mL) was stirred at room temperature for 0.5 h. Then tryptamine (4.5 mmol, 1.5 equiv.) was added to the mixture, the reaction was stirred at room temperature until completion (monitored by TLC). The solvent was evaporated under reduced pressure and the residue was purified by silica gel column chromatography (petroleum ether/ethyl acetate, 1/1) to afford **SI-1c**, yield 89-92%.

The compound **SI-1c** (2.6 mmol, 1.0 equiv.) was dissolved in DMF (25 mL), NaH (5.8 mmol, 2.2 equiv.) was added to the mixture under 0 °C, the mixture was stirred at this temperature for 0.5 h, then added BnBr (2.9 mmol, 1.1 equiv.) dropwise to the mixture, raised to room temperature and the reaction was stirred at this temperature until completion (monitored by TLC). Quenched with saturated NH<sub>4</sub>Cl aqueous, the mixture was diluted with water and extracted with Et<sub>2</sub>O, washed with brine, dried over anhydrous sodium sulfate and concentrated under reduced pressure. The residue was purified by silica gel column chromatography (petroleum ether/ethyl acetate, 3/1) to afford **SI-1d**, yield 76-87%.

The compound **SI-1d** (2.0 mmol, 1.0 equiv.) was dissolved in THF (50 mL) under Ar, *n*-BuLi in hexane (2.5 M, 4.3 mmol, 2.1 equiv.) was added to the solution dropwise at -78 °C. Then added CH<sub>3</sub>CHO (10.0 mmol, 5.0 equiv.) to the mixture after 0.5 h, and the reaction was raised to the room temperature after another 0.5 h, the mixture was stirred at this temperature for 12 h. Quenched with saturated NH<sub>4</sub>Cl aqueous, the mixture was diluted with water and extracted with EtOAc, washed with brine, dried over anhydrous sodium sulfate and concentrated under reduced pressure. The residue was purified by silica gel column chromatography (petroleum ether/ethyl acetate, 1/1; petroleum ether/ethyl acetate/DCM/MeOH, 10/10/10/1) to afford **SI-1e**, yield 51-63%,

brsm 90-95%.

The compound **SI-1e** (0.8 mmol, 1.0 equiv.) was dissolved in DCM (10 mL), NaHCO<sub>3</sub> (2.4 mmol, 3 equiv.) and DMP (1.2 mmol, 1.5 equiv.) was added to the reaction and the mixture was stirred at room temperature until completion (monitored by TLC). Then Na<sub>2</sub>S<sub>2</sub>O<sub>3</sub> aqueous was added to the mixture and stirred until the solution was clear, the mixture was diluted with water and extracted with EtOAc, washed with brine, dried over anhydrous sodium sulfate and concentrated under reduced pressure. The residue was purified by silica gel column chromatography (petroleum ether/ethyl acetate, 1/1) to afford **1h-k**, yield 85-91%.

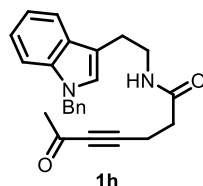

**Substrate *N*-(2-(1-benzyl-1H-indol-3-yl) ethyl)-6-oxohept-4-ynamide (1h)** was obtained as a light-yellow solid. Mp: 105-106 °C. <sup>1</sup>H NMR (400 MHz, CDCl<sub>3</sub>) δ 7.61 (d, *J* = 8.0 Hz, 1H), 7.33 – 7.28 (m, 4H), 7.22 – 7.18 (m, 1H), 7.15 – 7.11(m, 3H), 6.98 (s, 1H), 5.29 (s, 2H), 3.60 (q, *J* = 6.4 Hz, 2H), 2.98 (t, *J* = 6.8 Hz, 2H), 2.67 (t, *J* = 7.6 Hz, 2H), 2.33 (t, *J* = 7.2 Hz, 2H), 2.27 (s, 3H); <sup>13</sup>C NMR (101 MHz, CDCl<sub>3</sub>) δ 184.8, 169.9, 137.5, 136.7, 128.7, 127.8, 127.6, 126.8, 126.2, 122.0, 119.2, 118.8, 111.9, 109.89, 92.0, 81.5, 49.8, 39.8, 34.2, 32.7, 25.2, 15.1; **HRMS ESI** Calcd for C<sub>24</sub>H<sub>24</sub>N<sub>2</sub>O<sub>2</sub> [M+H]<sup>+</sup>: 373.1911, Found: 373.1913.

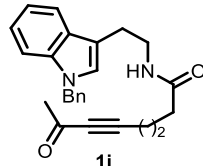

**Substrate *N*-(2-(1-benzyl-1H-indol-3-yl) ethyl)-7-oxooct-5-ynamide (1i)** was obtained as a light-yellow solid. Mp: 83-84 °C. <sup>1</sup>H NMR (400 MHz, CDCl<sub>3</sub>) δ 7.61 (d, *J* = 7.6 Hz, 1H), 7.33 – 7.25 (m, 3H), 7.22 – 7.17 (m, 1H), 7.15 – 7.09 (m, 3H), 6.96 (s, 1H), 5.57 (s, 1H), 5.28 (s, 2H), 3.60 (q, *J* = 6.4 Hz, 2H), 2.97 (t, *J* = 6.8 Hz, 2H), 2.39 (t, *J* = 6.8 Hz, 2H), 2.29 (s, 3H), 2.21 (t, *J* = 7.2 Hz, 2H), 1.90 – 1.83 (m, 2H); <sup>13</sup>C NMR (101 MHz, CDCl<sub>3</sub>) δ 184.8, 171.6, 137.5, 136.8, 128.8, 128.0, 127.6, 126.8, 126.1, 122.0, 119.2, 118.9, 112.1, 109.8, 92.7, 81.9, 49.9, 39.8, 34.9, 32.7, 25.3, 23.3, 18.3; **HRMS ESI** Calcd for C<sub>25</sub>H<sub>26</sub>N<sub>2</sub>O<sub>2</sub> [M+H]<sup>+</sup>: 387.2067, Found: 387.2066.

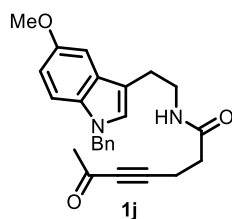

**Substrate *N*-(2-(1-benzyl-5-methoxy-1H-indol-3-yl)ethyl)-6-oxohept-4-ynamide (1j)** was obtained as a light-yellow solid. Mp: 102-103 °C. <sup>1</sup>H NMR (400 MHz, CDCl<sub>3</sub>) δ 7.32 – 7.25 (m, 3H), 7.16 (d, *J* = 8.8 Hz, 1H), 7.11 – 7.09 (m, 2H), 7.03 (d, *J*

= 2.4 Hz, 1H), 6.95 (s, 1H), 6.85 (dd,  $J = 8.8, 2.4$  Hz, 1H), 5.59 (s, 1H), 5.24 (s, 2H), 3.86 (s, 3H), 3.60 (q,  $J = 6.8$  Hz, 2H), 2.94 (t,  $J = 7.2$  Hz, 2H), 2.67 (t,  $J = 7.2$  Hz, 2H), 2.33 (t,  $J = 7.2$  Hz, 2H), 2.26 (s, 3H);  $^{13}\text{C}$  NMR (101 MHz,  $\text{CDCl}_3$ )  $\delta$  184.6, 169.9, 154.0, 137.6, 132.1, 128.7, 128.2, 127.6, 126.8, 126.8, 112.2, 111.3, 110.7, 100.7, 91.9, 81.6, 55.9, 50.1, 39.7, 34.4, 32.6, 25.2, 15.1; HRMS ESI Calcd for  $\text{C}_{25}\text{H}_{26}\text{N}_2\text{O}_3$   $[\text{M}+\text{H}]^+$ : 403.2016, Found: 403.2017.

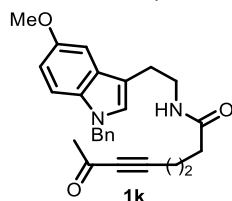

**Substrate *N*-(2-(1-benzyl-5-methoxy-1H-indol-3-yl)ethyl)-7-oxooct-5-ynamide (1k)** was obtained as a light-yellow solid. Mp: 81–82 °C.  $^1\text{H}$  NMR (400 MHz,  $\text{CDCl}_3$ )  $\delta$  7.31 – 7.25 (m, 3H), 7.16 (d,  $J = 8.8$  Hz, 1H), 7.11 – 7.09 (m, 2H), 7.03 (d,  $J = 2.8$  Hz, 1H), 6.94 (s, 1H), 6.84 (dd,  $J = 8.8, 2.4$  Hz, 1H), 5.58 (s, 1H), 5.24 (s, 2H), 3.85 (s, 3H), 3.59 (q,  $J = 6.8$  Hz, 2H), 2.94 (t,  $J = 7.2$  Hz, 2H), 2.39 (t,  $J = 6.8$  Hz, 2H), 2.28 (s, 3H), 2.21 (t,  $J = 7.2$  Hz, 2H), 1.90 – 1.84 (m, 2H);  $^{13}\text{C}$  NMR (101 MHz,  $\text{CDCl}_3$ )  $\delta$  184.8, 171.5, 154.0, 137.6, 132.1, 128.7, 128.3, 127.6, 126.8, 126.8, 126.72, 112.2, 111.5, 110.6, 100.2, 92.7, 81.9, 55.9, 50.1, 39.6, 34.9, 32.7, 25.3, 23.3, 18.3; HRMS ESI Calcd for  $\text{C}_{26}\text{H}_{28}\text{N}_2\text{O}_3$   $[\text{M}+\text{H}]^+$ : 417.2173, Found: 417.2171.

### General procedure for the substrates 1l–q:

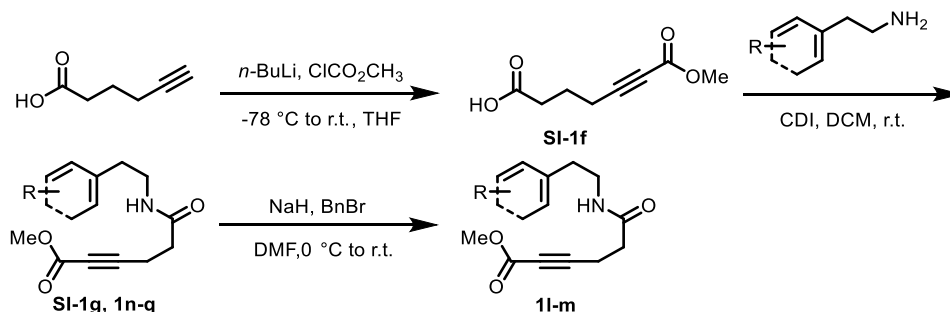

Hex-5-ynoic acid (2.0 mmol, 1.0 equiv.) was dissolved in THF (20 mL) under Ar, *n*-BuLi in hexane (2.5 M, 4.2 mmol, 2.1 equiv.) was added to the solution dropwise at  $-78$  °C, Then added  $\text{ClCO}_2\text{CH}_3$  (6.0 mmol, 3.0 equiv.) to the mixture after 0.5 h, and the reaction was raised to the room temperature after another 3 h, the mixture was stirred at this temperature until completion (monitored by TLC). Quenched with 1 N HCl aqueous and regulate pH 2–3, the mixture was diluted with water and extracted with EtOAc, washed with brine, dried over anhydrous sodium sulfate and concentrated under reduced pressure. The residue was purified by silica gel column chromatography (petroleum ether/ethyl acetate, 5/1) to afford **SI-1f**, yield 76%.

A mixture of **SI-1f** (1.0 mmol, 1.0 equiv.) and CDI (1.2 mmol, 1.2 equiv.) in DCM (10 mL) was stirred at room temperature for 0.5 h. Then arylethylamine (1.5 mmol, 1.5 equiv.) was added to the mixture, the reaction was stirred at room temperature until completion (monitored by TLC). The solvent was evaporated under reduced pressure

and the residue was purified by silica gel column chromatography (petroleum ether/ethyl acetate, 1/1) to afford **SI-1g** and **1n-q**, yield 90-93%.

The compound **SI-1g** (1.7 mmol, 1.0 equiv.) was dissolved in DMF (17 mL), NaH (3.7 mmol, 2.2 equiv.) was added to the mixture under 0 °C, the mixture was stirred at this temperature for 0.5 h, then add BnBr (1.9 mmol, 1.1 equiv.) dropwise to the mixture, raised to room temperature and the reaction was stirred at this temperature until completion (monitored by TLC). Quenched with saturated NH<sub>4</sub>Cl aqueous, the mixture was diluted with water and extracted with Et<sub>2</sub>O, washed with brine, dried over anhydrous sodium sulfate and concentrated under reduced pressure. The residue was purified by silica gel column chromatography (petroleum ether/ethyl acetate, 3/1) to afford **11-m** as a colorless oil, yield 75-83%.

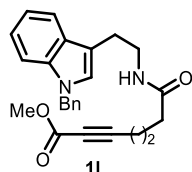

**Substrate Methyl 7-((2-(1-benzyl-1H-indol-3-yl)ethyl)amino)-7-oxohept-2-ynoate (11)** was obtained as a light-yellow solid. Mp: 108-109 °C. <sup>1</sup>H NMR (400 MHz, CDCl<sub>3</sub>) δ 7.76 (d, *J* = 6.8 Hz, 1H), 7.32 – 7.25 (m, 4H), 7.20 – 7.10 (m, 4H), 7.00 (s, 1H), 5.47 (s, 1H), 5.27 (s, 2H), 4.10 – 4.01 (m, 2H), 3.70 (s, 3H), 3.25 (t, *J* = 6.4 Hz, 2H), 3.01 (t, *J* = 8.0 Hz, 2H), 2.56 (t, *J* = 6.4 Hz, 2H), 1.79 (p, *J* = 6.4 Hz, 2H); <sup>13</sup>C NMR (101 MHz, CDCl<sub>3</sub>) δ 170.3, 167.9, 155.9, 137.5, 136.5, 128.7, 128.0, 127.5, 126.8, 126.0, 121.9, 119.2, 119.1, 111.7, 109.6, 96.0, 51.0, 49.9, 43.6, 33.4, 25.9, 22.4, 18.4; **HRMS ESI** Calcd for C<sub>25</sub>H<sub>26</sub>N<sub>2</sub>O<sub>3</sub> [M+H]<sup>+</sup>: 403.2016, Found: 403.2017.

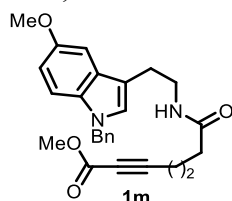

**Substrate Methyl 7-((2-(1-benzyl-5-methoxy-1H-indol-3-yl)ethyl)amino)-7-oxohept-2-ynoate (1m)** was obtained as a light-yellow solid. Mp: 104-105 °C. <sup>1</sup>H NMR (400 MHz, CDCl<sub>3</sub>) δ 7.38 – 7.25 (m, 4H), 7.21 (d, *J* = 2.4 Hz, 1H), 7.14 – 7.09 (m, 3H), 6.99 (s, 1H), 6.83 (dd, *J* = 8.8, 2.4 Hz, 1H), 5.51 (s, 1H), 5.24 (s, 2H), 4.03 – 3.99 (m, 2H), 3.90 (s, 3H), 3.69 (s, 3H), 3.26 (t, *J* = 6.4 Hz, 2H), 3.00 – 2.96 (m, 2H), 2.58 (t, *J* = 6.4 Hz, 2H), 1.81 (p, *J* = 6.4 Hz, 2H); <sup>13</sup>C NMR (101 MHz, CDCl<sub>3</sub>) δ 170.4, 167.9, 156.0, 154.0, 137.6, 131.8, 128.7, 128.3, 127.6, 126.8, 126.71, 112.4, 111.1, 110.6, 100.4, 96.0, 55.7, 50.9, 50.1, 43.6, 33.5, 26.0, 22.4, 18.5; **HRMS ESI** Calcd for C<sub>26</sub>H<sub>28</sub>N<sub>2</sub>O<sub>4</sub> [M+H]<sup>+</sup>: 433.2122, Found: 433.2120.

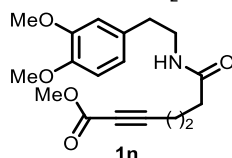

**Substrate Methyl 7-((3,4-dimethoxyphenethyl)amino)-7-oxohept-2-ynoate (1n)** was obtained as a white solid. Mp: 74-75 °C. <sup>1</sup>H NMR (400 MHz, CDCl<sub>3</sub>) δ 6.82

(d,  $J = 8.8$  Hz, 1H), 6.73 (d,  $J = 7.2$  Hz, 2H), 5.59 (s, 1H), 3.87 (s, 3H), 3.76 (s, 3H), 3.51 (d,  $J = 6.8$  Hz, 2H), 2.76 (t,  $J = 6.8$  Hz, 2H), 2.39 (t,  $J = 6.8$  Hz, 2H), 2.28 (d,  $J = 7.2$  Hz, 2H), 1.90 (p,  $J = 7.2$  Hz, 2H);  $^{13}\text{C}$  NMR (101 MHz,  $\text{CDCl}_3$ )  $\delta$  171.5, 154.0, 149.0, 147.7, 131.2, 120.6, 111.8, 111.4, 88.6, 73.5, 55.9, 55.9, 52.6, 40.6, 35.2, 34.7, 23.1, 17.9; **HRMS ESI** Calcd for  $\text{C}_{18}\text{H}_{23}\text{NO}_5$   $[\text{M}+\text{H}]^+$ : 334.1649, Found: 334.1647.

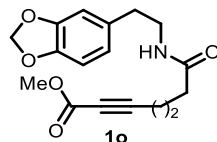

**Substrate Methyl 7-((2-(benzo[d][1,3]dioxol-5-yl)ethyl)amino)-7-oxohept-2-ynoate (1o)** was obtained as a white solid. Mp: 81-82 °C.  $^1\text{H}$  NMR (400 MHz,  $\text{CDCl}_3$ )  $\delta$  6.75 (d,  $J = 8.0$  Hz, 1H), 6.68 (d,  $J = 1.6$  Hz, 1H), 6.63 (dd,  $J = 7.6, 1.6$  Hz, 1H), 5.94 (s, 2H), 5.56 (s, 1H), 3.76 (s, 3H), 3.47 (q,  $J = 6.8$  Hz, 2H), 2.73 (t,  $J = 7.2$  Hz, 2H), 2.39 (t,  $J = 6.8$  Hz, 2H), 2.26 (t,  $J = 7.6$  Hz, 2H), 1.89 (p,  $J = 6.8$  Hz, 2H);  $^{13}\text{C}$  NMR (101 MHz,  $\text{CDCl}_3$ )  $\delta$  171.5, 154.1, 147.8, 146.2, 132.4, 121.6, 109.0, 108.4, 100.9, 88.6, 52.6, 40.7, 35.3, 34.7, 23.1, 17.9; **HRMS ESI** Calcd for  $\text{C}_{17}\text{H}_{19}\text{NO}_5$   $[\text{M}+\text{Na}]^+$ : 340.1155, Found: 340.1154.

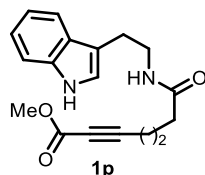

**Substrate Methyl 7-((2-(1H-indol-3-yl)ethyl)amino)-7-oxohept-2-ynoate (1p)** was obtained as a colorless oil.  $^1\text{H}$  NMR (400 MHz,  $\text{CDCl}_3$ )  $\delta$  8.58 (s, 1H), 7.57 (dd,  $J = 7.6, 12$  Hz, 1H), 7.36 (dt,  $J = 8.0, 1.2$  Hz, 1H), 7.21 – 7.17 (m, 1H), 7.12 – 7.08 (m, 1H), 6.99 (d,  $J = 2.0$  Hz, 1H), 5.70 (t,  $J = 5.6$  Hz, 1H), 3.75 (s, 3H), 3.56 (q,  $J = 6.4$  Hz, 2H), 2.94 (t,  $J = 6.8$  Hz, 2H), 2.34 (t,  $J = 6.8$  Hz, 2H), 2.17 (t,  $J = 7.2$  Hz, 2H), 1.84 (p,  $J = 7.2$  Hz, 2H).  $^{13}\text{C}$  NMR (101 MHz,  $\text{CDCl}_3$ )  $\delta$  171.6, 154.2, 136.3, 127.1, 122.3, 121.9, 119.2, 118.5, 112.4, 111.3, 88.81, 73.3, 52.6, 39.6, 34.6, 25.1, 23.0, 17.8; **HRMS ESI** Calcd for  $\text{C}_{18}\text{H}_{20}\text{N}_2\text{O}_3$   $[\text{M}+\text{H}]^+$ : 313.1547, Found: 313.1546.

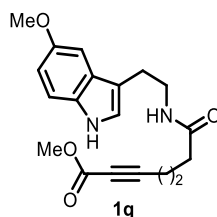

**Substrate Methyl 7-((2-(5-methoxy-1H-indol-3-yl)ethyl)amino)-7-oxohept-2-ynoate (1q)** was obtained as a colorless oil.  $^1\text{H}$  NMR (400 MHz,  $\text{CDCl}_3$ )  $\delta$  8.26 (s, 1H), 7.26 (d,  $J = 8.8$  Hz, 1H), 7.02 (d,  $J = 2.4$  Hz, 1H), 7.01 (d,  $J = 2.4$  Hz, 1H), 6.86 (dd,  $J = 8.8, 2.4$  Hz, 1H), 5.64 (s, 1H), 3.85 (s, 3H), 3.75 (s, 3H), 3.58 (q,  $J = 6.4$  Hz, 2H), 2.93 (t,  $J = 6.8$  Hz, 2H), 2.36 (t,  $J = 6.8$  Hz, 2H), 2.22 (t,  $J = 7.2$  Hz, 2H), 1.87 (p,  $J = 7.2$  Hz, 2H);  $^{13}\text{C}$  NMR (101 MHz,  $\text{CDCl}_3$ )  $\delta$  171.6, 154.2, 154.0, 131.6, 127.6, 123.0, 112.3, 112.3, 112.0, 100.4, 88.8, 73.5, 55.9, 52.6, 39.4, 34.7, 25.2, 23.1, 17.9; **HRMS ESI** Calcd for  $\text{C}_{19}\text{H}_{22}\text{N}_2\text{O}_4$   $[\text{M}+\text{H}]^+$ : 343.1652, Found: 343.1650.





### 3. General procedure for the tandem reaction

**Table SI-1a Optimization of the reaction conditions.<sup>a, b</sup>**

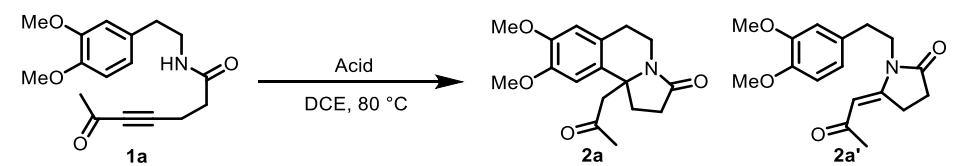

| Entry           | Acid (equiv.)                                                                   | Time (h) | Product       | yield |
|-----------------|---------------------------------------------------------------------------------|----------|---------------|-------|
| 1 <sup>c</sup>  | TfOH (1.0)                                                                      | 2        | N.R.          | —     |
| 2 <sup>c</sup>  | H <sub>3</sub> PO <sub>4</sub> (1.0)                                            | 2        | N.R.          | —     |
| 3 <sup>c</sup>  | TFA (1.0)                                                                       | 2        | N.R.          | —     |
| 4               | <i>p</i> -TsOH·H <sub>2</sub> O (1.0)                                           | 2        | <b>2-21a'</b> | 93%   |
| 5 <sup>d</sup>  | <i>p</i> -TsOH·H <sub>2</sub> O (1.0); BF <sub>3</sub> ·Et <sub>2</sub> O (3.0) | 2, 2     | <b>2-21a</b>  | 81%   |
| 6 <sup>d</sup>  | BF <sub>3</sub> ·Et <sub>2</sub> O (3.0)                                        |          | Complex       | —     |
| 7               | <i>p</i> -TsOH·H <sub>2</sub> O (0.1)                                           | 2        | <b>2-21a'</b> | 13%   |
| 8               | <i>p</i> -TsOH·H <sub>2</sub> O (0.2)                                           | 2        | <b>2-21a'</b> | 27%   |
| 9 <sup>e</sup>  | <i>p</i> -TsOH·H <sub>2</sub> O (0.1)                                           | 2        | <b>2-21a'</b> | 13%   |
| 10 <sup>e</sup> | <i>p</i> -TsOH·H <sub>2</sub> O (0.2)                                           | 2        | <b>2-21a'</b> | 29%   |
| 11 <sup>d</sup> | <i>p</i> -TsOH·H <sub>2</sub> O (1.0); BF <sub>3</sub> ·Et <sub>2</sub> O (1.0) | 2, 24    | <b>2-21a</b>  | 78%   |

<sup>a</sup>Reaction conditions: **1a** (0.1 mmol, 1.0 equiv.), acid, DCE (4 mL, 0.025M), then BF<sub>3</sub>·Et<sub>2</sub>O. <sup>b</sup>The yield was determined upon isolation of the target product. <sup>c</sup>The starting material was recovered. <sup>d</sup>BF<sub>3</sub>·Et<sub>2</sub>O was added under 0 °C, then raised to 30 °C. <sup>e</sup>In high concentration (0.1 M).

**Table SI-1b Optimization of the reaction conditions.<sup>a, b</sup>**

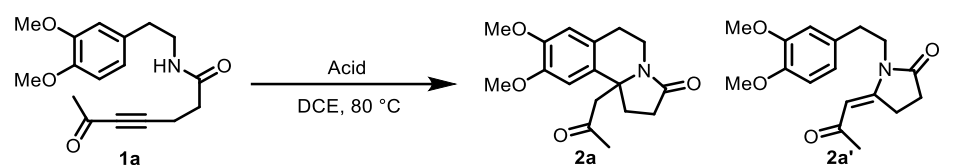

| Entry          | Solvent           | Temp. (°C) | Time | yield |
|----------------|-------------------|------------|------|-------|
| 1              | DCE               | 50         | 5    | 83%   |
| 2              | DCE               | 30         | 15   | 85%   |
| 3              | DCM               | 30         | 15   | 84%   |
| 4              | CHCl <sub>3</sub> | 30         | 15   | 85%   |
| 5 <sup>c</sup> | MeCN              | 30         | 23   | N.R.  |
| 6 <sup>c</sup> | THF               | 30         | 15   | N.R.  |

<sup>a</sup>Reaction conditions: **1a** (0.1 mmol, 1.0 equiv.), *p*-TsOH·H<sub>2</sub>O (0.1 mmol, 1.0 equiv.), solvent (4 mL), BF<sub>3</sub>·Et<sub>2</sub>O (0.3 mmol, 3.0 equiv.). <sup>b</sup>The yield was determined upon

isolation of the target product. <sup>c</sup>The starting material was recovered.

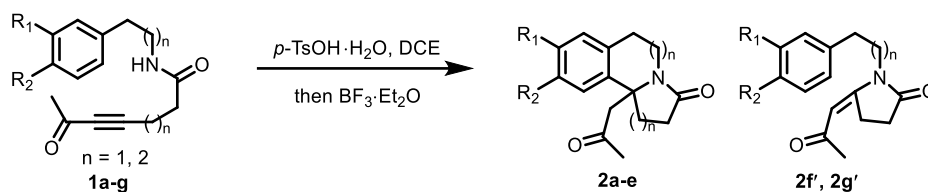

The compound **1a-g** (0.1 mmol, 1.0 equiv.) was dissolved in DCE (4 mL), added  $p\text{-TsOH}\cdot\text{H}_2\text{O}$  (0.1 mmol, 1.0 equiv.) to the mixture and stirred at 50 °C until the material disappeared (monitored by TLC). Then the mixture was cooled to 0 °C and added  $\text{BF}_3\cdot\text{Et}_2\text{O}$  dropwise for 2 h. The reaction was quenched with saturated  $\text{NaHCO}_3$  aqueous, the mixture was diluted with water and extracted with DCM, washed with brine, dried over anhydrous sodium sulfate and concentrated under reduced pressure. The residue was purified by silica gel column chromatography (petroleum ether/ethyl acetate/DCM/MeOH, 10/10/10/1) to afford **2a-e** and **2f', 2g', 2r'** as a colorless oil.

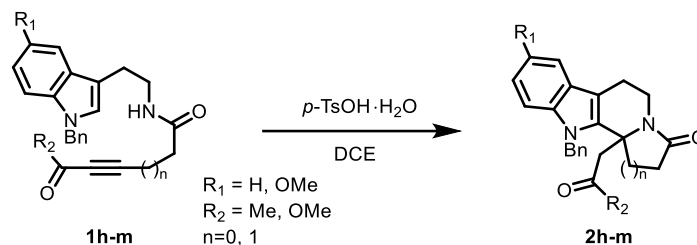

The compound **1h-m** (0.1 mmol, 1.0 equiv.) was dissolved in DCE (4 mL), added  $p\text{-TsOH}\cdot\text{H}_2\text{O}$  (0.1 mmol, 1.0 equiv.) to the mixture and stirred at 30 °C until completion (monitored by TLC). Then the reaction was quenched with saturated  $\text{NaHCO}_3$  aqueous, the mixture was diluted with water and extracted with DCM, washed with brine, dried over anhydrous sodium sulfate and concentrated under reduced pressure. The residue was purified by silica gel column chromatography (petroleum ether/ethyl acetate/DCM/MeOH, 10/10/10/1) to afford **2h-m** as a light-yellow oil.

## 4. Characterization data for the products

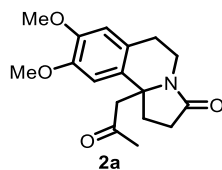

**Substrate 8,9-dimethoxy-10b-(2-oxopropyl)-1,5,6,10-tetrahydropyrrolo [2,1-a] isoquinolin-3(2H)-one (2a)**, yield 88%.  $^1\text{H NMR}$  (400 MHz,  $\text{CDCl}_3$ )  $\delta$  6.60 (s, 1H), 6.58 (s, 1H), 4.33 (ddd,  $J = 13.6, 6.8, 2.0$  Hz, 1H), 3.86 (s, 6H), 3.21 – 3.13 (m, 1H), 2.98 – 2.91 (m, 2H), 2.90 – 2.84 (m, 2H), 2.75 – 2.69 (m, 1H), 2.66 – 2.57 (m, 1H), 2.44 – 2.36 (m, 1H), 2.21 – 2.12 (m, 1H), 2.05 (s, 3H);  $^{13}\text{C NMR}$  (101 MHz,  $\text{CDCl}_3$ )  $\delta$  206.6, 173.3, 148.1, 147.9, 133.1, 124.6, 111.5, 108.0, 62.7, 56.0, 55.8, 52.0, 34.4, 32.4, 31.7, 30.6, 27.4; **HRMS ESI** Calcd for  $\text{C}_{17}\text{H}_{21}\text{NO}_4$   $[\text{M}+\text{H}]^+$ : 304.1543, Found: 304.1544.

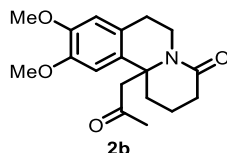

**Substrate 9,10-dimethoxy-11b-(2-oxopropyl)-1,2,3,6,7,11b-hexahydro-4H-pyrrolo[2,1-a] isoquinolin-4-one (2b)**, yield 65%.  $^1\text{H NMR}$  (400 MHz,  $\text{CDCl}_3$ )  $\delta$  6.71 (s, 1H), 6.59 (s, 1H), 4.94 (ddd,  $J = 12.8, 5.6, 2.0$  Hz, 1H), 3.86 (s, 3H), 3.83 (s, 3H), 3.12 (d,  $J = 14.0$  Hz, 1H), 3.05 – 2.85 (m, 4H), 2.69 – 2.63 (m, 1H), 2.58 – 2.52 (m, 1H), 2.43 – 2.35 (m, 1H), 2.01 (s, 3H), 1.93 – 1.84 (m, 1H), 1.83 – 1.77 (m, 1H);  $^{13}\text{C NMR}$  (101 MHz,  $\text{CDCl}_3$ )  $\delta$  206.8, 169.7, 148.0, 147.5, 132.4, 126.4, 111.5, 108.7, 60.6, 56.0, 55.8, 51.9, 35.9, 34.3, 32.8, 32.0, 28.3, 16.9; **HRMS ESI** Calcd for  $\text{C}_{18}\text{H}_{23}\text{NO}_4$   $[\text{M}+\text{H}]^+$ : 318.1700, Found: 318.1699.

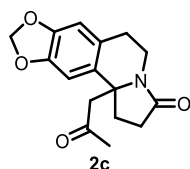

**Substrate 11b-(2-oxopropyl)-1,5,6,11b-tetrahydro-1,3-dioxolo[4,5-g]pyrrolo[2,1-a] isoquinolin-3(2H)-one (2c)**, yield 78%.  $^1\text{H NMR}$  (400 MHz,  $\text{CDCl}_3$ )  $\delta$  6.60 (s, 1H), 6.56 (s, 1H), 5.94 – 5.92 (m, 2H), 4.28 (ddd,  $J = 13.3, 7.0, 2.0$  Hz, 1H), 3.19 – 3.12 (m, 1H), 2.98 (d,  $J = 14.8$  Hz, 1H), 2.93 – 2.83 (m, 2H), 2.81 – 2.75 (m, 1H), 2.73 – 2.67 (m, 1H), 2.66 – 2.56 (m, 1H), 2.38 (ddd,  $J = 17.0, 7.6, 2.4$  Hz, 1H), 2.17 – 2.08 (m, 1H), 2.06 (s, 3H);  $^{13}\text{C NMR}$  (101 MHz,  $\text{CDCl}_3$ )  $\delta$  206.2, 173.3, 146.6, 146.6, 134.3, 125.7, 108.7, 105.0, 101.0, 62.8, 52.2, 34.4, 32.2, 32.1, 30.6, 27.9; **HRMS ESI** Calcd for  $\text{C}_{16}\text{H}_{17}\text{NO}_4$   $[\text{M}+\text{H}]^+$ : 288.1230, Found: 288.1231.

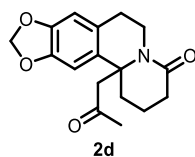

**Substrate 12b-(2-oxopropyl)-1,2,3,6,7,12b-hexahydro-4H- [1,3] dioxolo[4,5-g]pyrido[2,1-a]isoquinolin-4-one (2d)**, yield 68%.  $^1\text{H NMR}$  (400 MHz,  $\text{CDCl}_3$ )  $\delta$  6.69 (s, 1H), 6.57 (s, 1H), 5.94 – 5.92 (m, 2H), 4.87 (ddd,  $J = 13.0, 5.6, 2.4$  Hz, 1H), 3.07 – 2.95 (m, 3H), 2.94 – 2.85 (m, 1H), 2.75 – 2.70 (m, 1H), 2.67 – 2.62 (m, 1H), 2.57 – 2.50 (m, 1H), 2.43 – 2.34 (m, 1H), 2.03 (s, 3H), 1.92 – 1.68 (m, 4H);  $^{13}\text{C NMR}$  (101 MHz,  $\text{CDCl}_3$ )  $\delta$  206.3, 169.8, 146.5, 146.5, 133.6, 127.7, 108.8, 105.4, 101.1, 60.9, 52.3, 36.1, 34.7, 32.6, 31.9, 28.8, 16.9; **HRMS ESI** Calcd for  $\text{C}_{17}\text{H}_{19}\text{NO}_4$   $[\text{M}+\text{H}]^+$ : 302.1387, Found: 302.1388.

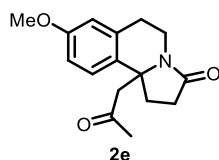

**Substrate 8-methoxy-10b-(2-oxopropyl)1,5,6,10b-tetrahydropyrrolo[2,1a]-isoquinolin-3(2H)-one (2e)**, yield 81%.  $^1\text{H NMR}$  (400 MHz,  $\text{CDCl}_3$ )  $\delta$  7.05 (d,  $J = 8.4$  Hz, 1H), 6.79 (dd,  $J = 8.6, 2.8$  Hz, 1H), 6.64 (s, 1H), 4.30 (ddd,  $J = 13.2, 6.8, 2.0$  Hz, 1H), 3.79 (s, 3H), 3.19 (td,  $J = 12.0, 4.8$  Hz, 1H), 3.00 – 2.91 (m, 2H), 2.88 – 2.76 (m, 3H), 2.67 – 2.58 (m, 1H), 2.38 (ddd,  $J = 17.0, 10.2, 2.0$  Hz, 1H), 2.19 – 2.10 (m, 1H), 2.03 (s, 3H);  $^{13}\text{C NMR}$  (101 MHz,  $\text{CDCl}_3$ )  $\delta$  206.4, 173.4, 158.2, 133.8, 133.5, 126.2, 113.5, 113.2, 62.5, 55.2, 52.2, 34.3, 32.2, 32.0, 30.6, 28.1; **HRMS ESI** Calcd for  $\text{C}_{16}\text{H}_{19}\text{NO}_3$   $[\text{M}+\text{H}]^+$ : 274.1438, Found: 274.1436. **HRMS ESI** Calcd for  $\text{C}_{17}\text{H}_{21}\text{NO}_3$   $[\text{M}+\text{H}]^+$ : 288.1594, Found: 288.1591.

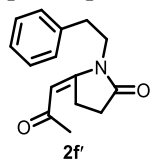

**Substrate (E)-5-(2-oxopropylidene)-1-phenethylpyrrolidin-2-one (2f)**, yield 93%.  $^1\text{H NMR}$  (400 MHz,  $\text{CDCl}_3$ )  $\delta$  7.34 – 7.30 (m, 2H), 7.27 – 7.21 (m, 3H), 5.64 (t,  $J = 2.0$  Hz, 1H), 3.77 – 3.74 (m, 2H), 3.25 – 3.21 (m, 2H), 2.88 – 2.84 (m, 2H), 2.52 – 2.48 (m, 2H), 2.19 (s, 3H);  $^{13}\text{C NMR}$  (101 MHz,  $\text{CDCl}_3$ )  $\delta$  196.8, 177.1, 159.4, 137.6, 128.6, 128.6, 126.8, 99.5, 41.7, 32.5, 31.6, 27.6, 25.5; **HRMS ESI** Calcd for  $\text{C}_{15}\text{H}_{17}\text{NO}_2$   $[\text{M}+\text{H}]^+$ : 244.1332, Found: 244.1331.

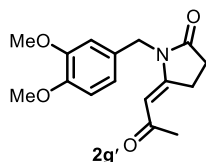

**Substrate (E)-1-(3,4-dimethoxybenzyl)-5-(2-oxopropylidene)pyrrolidin-2-one (2g')**, yield 91%.  $^1\text{H NMR}$  (400 MHz,  $\text{CDCl}_3$ )  $\delta$  6.82 (dd,  $J = 6.4$  Hz,  $J = 2.4$  Hz, 1H), 6.78 – 6.76 (m, 2H), 5.71 (t,  $J = 2.0$  Hz, 1H), 4.67 (s, 2H), 3.87 (s, 3H), 3.87 (s, 3H), 3.28 (ddd,  $J = 9.6, 5.2, 2.0$  Hz, 2H), 2.65 – 2.62 (m, 2H), 2.14 (s, 3H);  $^{13}\text{C NMR}$  (101 MHz,  $\text{CDCl}_3$ )  $\delta$  196.8, 177.6, 159.2, 149.2, 148.6, 127.2, 119.5, 110.9, 110.4, 100.7, 55.9, 55.8, 44.0, 31.6, 27.8, 25.6; **HRMS ESI** Calcd for  $\text{C}_{16}\text{H}_{19}\text{NO}_4$   $[\text{M}+\text{H}]^+$ : 290.1387, Found: 290.1386.

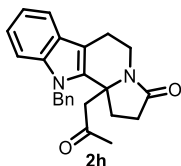

**Substrate 11-benzyl-11b-(2-oxopropyl)-1,2,5,6,11,11b-hexahydro-3H-indolizino[8,7-b]indol-3-one (2h)**, yield 81%.  $^1\text{H NMR}$  (400 MHz,  $\text{CDCl}_3$ )  $\delta$  7.55 – 7.51 (m, 1H), 7.30 – 7.23 (m, 3H), 7.17 – 7.12 (m, 2H), 7.09 – 7.06 (m, 1H), 6.88 – 6.86 (m, 2H), 5.46 – 5.35 (m, 2H), 4.58 (ddd,  $J = 13.4, 6.0, 1.2$  Hz, 1H), 3.21 – 3.11 (m, 2H), 2.99 – 2.85 (m, 2H), 2.75 – 2.61 (m, 3H), 2.40 – 2.33 (m, 1H), 2.28 – 2.20 (m, 1H), 2.02 (s, 3H);  $^{13}\text{C NMR}$  (101 MHz,  $\text{CDCl}_3$ )  $\delta$  205.6, 173.2, 137.6, 137.1, 136.9, 128.9, 127.5, 126.3, 125.5, 122.6, 120.0, 118.7, 110.1, 107.7, 61.5, 50.2, 47.7, 34.8, 32.1, 30.8, 29.6, 21.0; **HRMS ESI** Calcd for  $\text{C}_{24}\text{H}_{24}\text{N}_2\text{O}_2$   $[\text{M}+\text{H}]^+$ : 373.1911, Found: 373.1913.

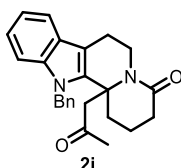

**Substrate 12-benzyl-12b-(2-oxopropyl)-2,3,6,7,12,12b-hexahydroindolo[2,3-a]quinoxalin-4(1H)-one (2i)**, yield 76%.  $^1\text{H NMR}$  (400 MHz,  $\text{CDCl}_3$ )  $\delta$  7.58 – 7.51 (m, 1H), 7.29 – 7.23 (m, 3H), 7.17 – 7.12 (m, 2H), 7.10 – 7.06 (m, 1H), 6.88 – 6.86 (m, 2H), 5.52 – 5.42 (m, 2H), 5.15 – 5.11 (m, 1H), 3.26 (d,  $J = 14.8$  Hz, 1H), 3.11 – 2.94 (m, 2H), 2.88 (d,  $J = 14.4$  Hz, 1H), 2.82 – 2.77 (m, 1H), 2.55 – 2.43 (m, 2H), 2.37 – 2.29 (m, 1H), 2.13 – 2.04 (m, 4H), 1.64 – 1.45 (m, 2H);  $^{13}\text{C NMR}$  (101 MHz,  $\text{CDCl}_3$ )  $\delta$  205.6, 170.7, 137.8, 137.1, 137.1, 128.8, 127.4, 126.2, 125.4, 122.8, 120.0, 118.6, 111.2, 110.0, 60.6, 51.7, 48.5, 37.3, 33.1, 32.5, 32.1, 21.3, 17.1; **HRMS ESI** Calcd for  $\text{C}_{25}\text{H}_{26}\text{N}_2\text{O}_2$   $[\text{M}+\text{H}]^+$ : 387.2067, Found: 387.2066.

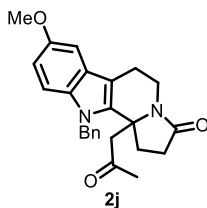

**Substrate 11-benzyl-8-methoxy-11b-(2-oxopropyl)-1,2,5,6,11,11b-hexahydro-3H-indolizino[8,7-b]indol-3-one (2j)**, yield 60%.  $^1\text{H NMR}$  (400 MHz,  $\text{CDCl}_3$ )  $\delta$  7.30 – 7.23 (m, 3H), 6.96 – 6.94 (m, 2H), 6.86 (dd,  $J = 7.8, 1.6$  Hz, 2H), 6.79 (dd,  $J = 8.8, 2.4$  Hz, 1H), 5.41 – 5.32 (m, 2H), 4.58 (ddd,  $J = 13.4, 6.2, 1.2$  Hz, 1H), 3.85 (s, 1H), 3.20 – 3.07 (m, 2H), 2.95 – 2.82 (m, 2H), 2.74 – 2.61 (m, 3H), 2.41 – 2.36 (m, 1H), 2.26 – 2.22 (m, 1H), 2.03 (s, 3H);  $^{13}\text{C NMR}$  (101 MHz,  $\text{CDCl}_3$ )  $\delta$  205.7, 173.3, 154.5, 138.2, 137.1, 132.2, 128.9, 127.6, 126.7, 125.5, 112.6, 111.0, 107.3, 100.6, 61.6, 55.9, 50.3, 47.9, 34.9, 32.1, 30.9, 29.6, 21.1; **HRMS ESI** Calcd for  $\text{C}_{25}\text{H}_{26}\text{N}_2\text{O}_3$   $[\text{M}+\text{H}]^+$ : 403.2016, Found: 403.2017.

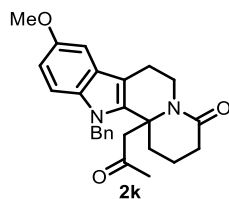

**Substrate 12-benzyl-9-methoxy-12b-(2-oxopropyl)-2,3,6,7,12,12b-hexahydroindolo[2,3-a]quinolizin-4(1H)-one (2k)**, yield 62%.  $^1\text{H NMR}$  (400 MHz,  $\text{CDCl}_3$ )  $\delta$  7.29 – 7.20 (m, 2H), 6.98 – 6.94 (m, 2H), 6.87 – 6.85 (m, 2H), 6.80 (dd,  $J = 8.8, 2.4$  Hz, 1H), 5.48 – 5.38 (m, 2H), 5.13 (ddd,  $J = 12.8, 5.2, 1.2$  Hz, 1H), 3.85 (s, 3H), 3.25 (d,  $J = 14.4$  Hz, 1H), 3.07 (td,  $J = 12.0, 4.0$  Hz, 1H), 2.99 – 2.91 (m, 2H), 2.87 (d,  $J = 14.4$  Hz, 1H), 2.75 (ddd,  $J = 15.0, 4.0, 1.2$  Hz, 1H), 2.54 – 2.43 (m, 2H), 2.38 – 2.30 (m, 1H), 2.10 – 2.03 (m, 4H), 1.64 – 1.47 (m, 2H);  $^{13}\text{C NMR}$  (101 MHz,  $\text{CDCl}_3$ )  $\delta$  170.7, 154.4, 137.6, 137.3, 132.9, 128.8, 127.4, 126.4, 125.4, 112.8, 110.9, 110.8, 100.3, 60.6, 55.8, 51.7, 48.6, 37.3, 33.1, 32.5, 32.1, 21.4, 17.1; **HRMS ESI** Calcd for  $\text{C}_{26}\text{H}_{28}\text{N}_2\text{O}_3$   $[\text{M}+\text{H}]^+$ : 417.2173, Found: 417.2171.

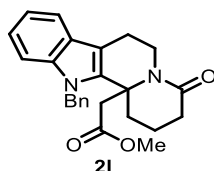

**Substrate Methyl 2-(12-benzyl-4-oxo-1,2,3,4,7,12-hexahydroindolo[2,3-a]quinolizin-12b(6H)-yl) acetate (2l)**, yield 81%.  $^1\text{H NMR}$  (400 MHz,  $\text{CDCl}_3$ )  $\delta$  7.58 – 7.51 (m, 1H), 7.32 – 7.23 (m, 3H), 7.17 – 7.11 (m, 2H), 7.08 – 7.03 (m, 1H), 6.90 (dd,  $J = 8.0, 1.6$  Hz, 2H), 5.52 – 5.41 (m, 2H), 5.09 (ddd,  $J = 13.0, 5.4, 1.2$  Hz, 1H), 3.62 (s, 3H), 3.17 – 3.09 (m, 2H), 2.99 – 2.91 (m, 2H), 2.87 (d,  $J = 14.0$  Hz, 1H), 2.77 (ddd,  $J = 15.6, 4.0, 1.2$  Hz, 1H), 2.60 – 2.53 (m, 1H), 2.47 – 2.30 (m, 2H), 2.15 – 2.08 (m, 1H), 1.69 – 1.59 (m, 1H), 1.56 – 1.47 (m, 1H);  $^{13}\text{C NMR}$  (101 MHz,  $\text{CDCl}_3$ )  $\delta$  170.4, 169.9, 137.8, 137.1, 137.1, 128.8, 127.4, 126.2, 125.4, 122.7, 119.9, 118.6, 111.3, 110.0, 60.0, 52.0, 48.6, 44.6, 37.1, 33.6, 32.4, 21.3, 17.0; **HRMS ESI** Calcd for  $\text{C}_{25}\text{H}_{26}\text{N}_2\text{O}_3$   $[\text{M}+\text{H}]^+$ : 403.2016, Found: 403.2017.

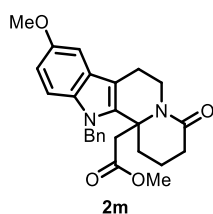

**Substrate Methyl 12-(12-benzyl-9-methoxy-4-oxo-1,2,3,4,7,12-hexahydroindolo[2,3-a]quinolizin-12b(6H)-yl) acetate (2m)**, yield 60%.  $^1\text{H NMR}$  (400 MHz,  $\text{CDCl}_3$ )  $\delta$  7.30 – 7.27 (m, 1H), 7.26 – 7.21 (m, 2H), 6.98 – 6.87 (m, 4H), 6.79 (dd,  $J = 8.8, 2.4$  Hz, 1H), 5.42 (d,  $J = 4.0$  Hz, 2H), 5.09 (ddd,  $J = 13.2, 5.4, 1.2$  Hz, 1H), 3.85 (s, 3H), 3.62 (s, 3H), 3.16 – 3.09 (m, 2H), 2.97 – 2.88 (m, 1H), 2.85 (d,  $J = 15.4$  Hz, 1H), 2.75 – 2.69 (m, 1H), 2.55 (ddd,  $J = 14.0, 8.0, 3.2$  Hz, 1H), 2.47 – 2.30 (m, 2H), 2.11 (ddd,  $J = 13.6, 10.0, 3.6$  Hz, 1H), 1.66 – 1.59 (m, 1H), 1.57 – 1.48 (m, 1H);  $^{13}\text{C NMR}$  (101 MHz,  $\text{CDCl}_3$ )  $\delta$  170.4, 170.0, 154.4, 137.7, 137.3, 133.0, 128.9, 127.4, 126.5,

125.4, 112.8, 110.9, 110.9, 100.4, 60.1, 55.9, 52.1, 48.7, 44.6, 37.1, 33.6, 32.4, 21.4, 17.0; **HRMS ESI** Calcd for C<sub>26</sub>H<sub>28</sub>N<sub>2</sub>O<sub>4</sub> [M+H]<sup>+</sup>: 433.2122, Found: 433.2120.

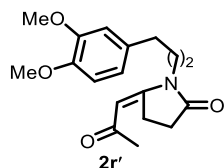

**Substrate (*E*)-1-(3-(3,4-dimethoxyphenyl)propyl)-5-(2-oxopropylidene)pyrrolidin-2-one (1r')**, yield 93%. <sup>1</sup>H NMR (400 MHz, CDCl<sub>3</sub>) δ 6.82 (d, *J* = 8.8 Hz, 1H), 6.75 (dd, *J* = 6.4, 2.0 Hz, 2H), 5.49 (s, 1H), 3.88 (s, 3H), 3.86 (s, 3H), 3.54 (t, *J* = 7.2 Hz, 2H), 3.20 (td, *J* = 7.0, 2.0 Hz, 2H), 2.62 (t, *J* = 7.6 Hz, 2H), 2.51 – 2.47 (m, 2H), 2.15 (s, 3H), 1.89 (p, *J* = 7.2 Hz, 2H); <sup>13</sup>C NMR (101 MHz, CDCl<sub>3</sub>) δ 196.6, 177.2, 159.5, 148.8, 147.3, 133.1, 120.0, 111.5, 111.1, 99.4, 55.8, 55.7, 39.7, 32.4, 31.4, 27.6, 27.5, 25.5; **HRMS ESI** Calcd for C<sub>18</sub>H<sub>23</sub>NO<sub>4</sub> [M+H]<sup>+</sup>: 318.1700, Found: 318.1699.

## 5. Total Synthesis of Erysotramidine

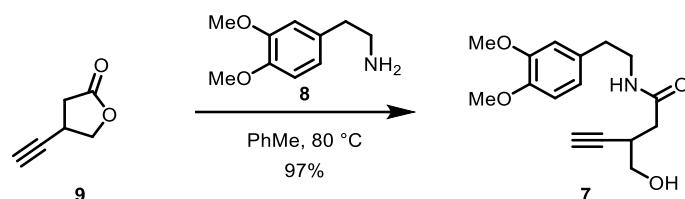

The compound **9**<sup>1</sup> (0.6 g, 5.5 mmol, 1.0 equiv.) was dissolved in toluene (55 mL), added 3,4-dimethoxyphenethylamine **8** (1.8 mL/2.0 g, 11.0 mmol, 2.0 equiv.), the mixture was heated to 80 °C until completion (monitored by TLC). The solvent was evaporated under reduced pressure and the residue was purified by silica gel column chromatography (petroleum ether/ethyl acetate/DCM/MeOH, 10/10/10/1) to afford the product **7**, yield 97%.

**Substrate *N*-(3,4-dimethoxyphenethyl)-3-(hydroxymethyl)pent-4-ynamide (7)** was obtained as a light-yellow solid. Mp: 71-72°C. <sup>1</sup>H NMR (400 MHz, CDCl<sub>3</sub>) δ 6.81 (d, *J* = 8.0 Hz, 1H), 6.74 (d, *J* = 7.2 Hz, 2H), 6.10 (t, *J* = 5.6 Hz, 1H), 3.87 (s, 3H), 3.86 (s, 3H), 3.72 – 3.62 (m, 2H), 3.51 (q, *J* = 6.8 Hz, 2H), 3.39 (t, *J* = 6.4, 1H), 3.06 – 3.00 (m, 1H), 2.77 (t, *J* = 6.8 Hz, 2H), 2.45 (qd, *J* = 14.4, 6.8 Hz, 2H), 2.13 (d, *J* = 2.4 Hz, 1H); <sup>13</sup>C NMR (101 MHz, CDCl<sub>3</sub>) δ 170.8, 148.8, 147.5, 131.0, 120.5, 111.7, 111.1, 83.5, 71.3, 64.5, 55.8, 55.8, 40.8, 38.5, 35.0, 31.3; **HRMS ESI** Calcd for C<sub>16</sub>H<sub>21</sub>NO<sub>4</sub> [M+H]<sup>+</sup>: 292.1543, Found: 292.1542.

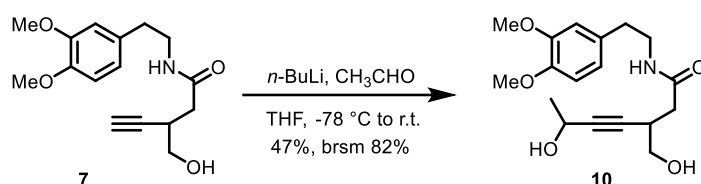

The compound **7** (2.0 g, 6.8 mmol, 1.0 equiv.) was dissolved in THF (70 mL) under Ar, *n*-BuLi in hexane (2.5 M, 8.7 mL, 21.8 mmol, 3.2 equiv.) was added to the solution dropwise at -78 °C. Then added CH<sub>3</sub>CHO (6.8 mL, 34.0 mmol, 5 equiv.) to the mixture after 0.5 h, and the reaction was raised to the room temperature after another 0.5 h, the mixture was stirred at this temperature for 12 h. Quenched with saturated NH<sub>4</sub>Cl aqueous, the mixture was diluted with water and extracted with EtOAc, washed with brine, dried over anhydrous sodium sulfate and concentrated under reduced pressure. The residue was purified by silica gel column chromatography (petroleum ether/ethyl acetate, 1/1; petroleum ether/ethyl acetate/DCM/MeOH, 10/10/10/2) to afford the product **10** as a light-yellow oil, yield 47%, brsm 82%.

**Substrate *N*-(3,4-dimethoxyphenethyl)-6-hydroxy-3-(hydroxymethyl)hept-4-ynamide (10)**. <sup>1</sup>H NMR (400 MHz, CDCl<sub>3</sub>) δ 6.80 (d, *J* = 8.4 Hz, 1H), 6.73 (d, *J* = 5.2 Hz, 2H), 6.40 (q, *J* = 5.2 Hz, 1H), 4.45 (q, *J* = 6.4 Hz, 1H), 3.86 (s, 3H), 3.85 (s, 3H), 3.63 (d, *J* = 5.2 Hz, 2H), 3.48 (q, *J* = 6.8 Hz, 2H), 3.01 (p, *J* = 6.0, 4.4 Hz, 1H), 2.76 (t, *J* = 7.2 Hz, 2H), 2.41 (qd, *J* = 14.4, 6.4 Hz, 2H), 1.37 (d, *J* = 6.8 Hz, 3H); <sup>13</sup>C NMR (101 MHz, CDCl<sub>3</sub>) δ 171.5, 149.0, 147.7, 131.2, 120.7, 112.0, 111.4, 85.6, 83.2, 64.5, 57.9, 55.9, 41.0, 38.7, 35.2, 31.7, 24.4; **HRMS ESI** Calcd for C<sub>18</sub>H<sub>25</sub>NO<sub>5</sub> [M+H]<sup>+</sup>: 336.1805, Found: 336.1806.



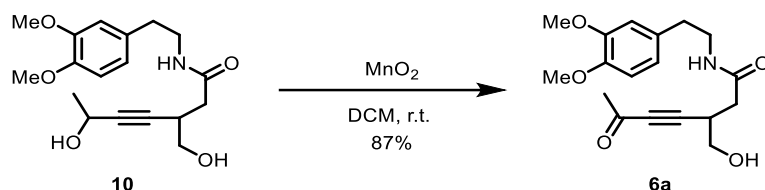

The compound **10** (70mg, 0.2 mmol, 1.0 equiv.) was dissolved in DCM (5 mL), then MnO<sub>2</sub> (696mg, 8.0 mmol, 40.0 equiv.) was added to the mixture and the reaction was stirred at room temperature until completion (monitored by TLC). The mixture filtered through a plug of celite, washed with DCM and concentrated under reduced pressure. The residue was purified by silica gel column chromatography (petroleum ether/ethyl acetate, 1/1.5) to afford the product **6a** as a light-yellow oil, yield 87%.

**Substrate *N*-(3,4-dimethoxyphenethyl)-3-(hydroxymethyl)-6-oxohept-4-ynamide (6a).** <sup>1</sup>H NMR (400 MHz, CDCl<sub>3</sub>) δ 6.81 (d, *J* = 8.4 Hz, 1H), 6.73 (dd, *J* = 5.4 Hz, *J* = 2.0 Hz, 2H), 6.11 – 6.05 (m, 1H), 3.87 (s, 3H), 3.86 (s, 3H), 3.76 – 3.68 (m, 2H), 3.51 (q, *J* = 6.8 Hz, 2H), 3.22 (p, *J* = 6.4, 6.0 Hz, 1H), 2.77 (t, *J* = 7.2 Hz, 2H), 2.49 (qd, *J* = 14.6, 6.8 Hz, 2H), 2.31 (s, 3H); <sup>13</sup>C NMR (101 MHz, CDCl<sub>3</sub>) δ 184.7, 170.2, 149.0, 147.6, 131.0, 120.6, 111.8, 111.3, 92.3, 82.8, 63.8, 55.8, 55.8, 40.9, 37.7, 35.1, 32.7, 31.6; **HRMS ESI** Calcd for C<sub>18</sub>H<sub>23</sub>NO<sub>5</sub> [M+H]<sup>+</sup>: 334.1649, Found: 334.1648.

**Table SI-2 Optimization of the reaction conditions.** <sup>a,b</sup>

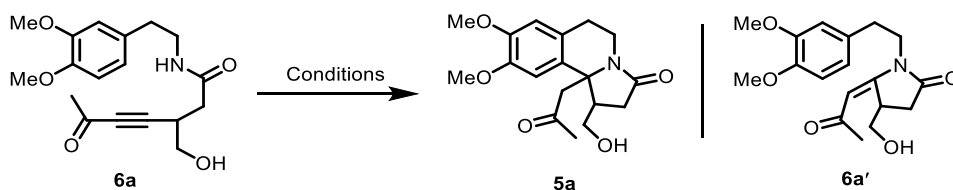

| Entry          | Conditions                                                                                       | Results        |
|----------------|--------------------------------------------------------------------------------------------------|----------------|
| 1              | 1 equiv. <i>p</i> -TsOH·H <sub>2</sub> O, 30 °C, DCM                                             | 93% <b>6a'</b> |
| 2              | 1 equiv. <i>p</i> -TsOH·H <sub>2</sub> O, 50 °C, DCM                                             | 91% <b>6a'</b> |
| 3              | 1 equiv. <i>p</i> -TsOH·H <sub>2</sub> O, 30 °C, DCE                                             | 94% <b>6a'</b> |
| 4              | 1 equiv. <i>p</i> -TsOH·H <sub>2</sub> O, 50 °C, DCE                                             | 92% <b>6a'</b> |
| 5              | 1 equiv. <i>p</i> -TsOH·H <sub>2</sub> O, 80 °C, DCE                                             | Complex        |
| 6              | 1.5 equiv. <i>p</i> -TsOH·H <sub>2</sub> O, 30 °C, DCE                                           | 91% <b>6a'</b> |
| 7 <sup>c</sup> | 1 equiv. <i>p</i> -TsOH·H <sub>2</sub> O, 30 °C, DCE; 3equiv. BF <sub>3</sub> ·Et <sub>2</sub> O | 90% <b>6a'</b> |

<sup>a</sup>Reaction conditions: **6a** (0.1 mmol, 1.0 equiv.), acid (0.1 mmol, 1.0 equiv.), solvent (4 mL). <sup>b</sup>The yield was determined upon isolation of the target product. <sup>c</sup>BF<sub>3</sub>·Et<sub>2</sub>O (0.3 mmol, 3.0 equiv.) was added to the mixture until the material disappeared (monitored by TLC); reaction temperature was from 0 °C to 60 °C.

**Substrate (*E*)-1-(3,4-dimethoxyphenethyl)-4-(hydroxymethyl)-5-(2-oxopropylidene)pyrrolidin-2-one (6a')** was obtained as a light-yellow oil; <sup>1</sup>H NMR (400 MHz,

CDCl<sub>3</sub>)  $\delta$  6.79 (d,  $J$  = 8.86 Hz, 1H), 6.72 (dd,  $J$  = 6.4, 2.0 Hz, 2H), 6.15 (t,  $J$  = 5.4 Hz, 1H), 5.28 (s, 1H), 4.55 (dd,  $J$  = 11.2, 5.6 Hz, 1H), 4.06 (dd,  $J$  = 12.8, 11.2 Hz, 1H), 3.86 (s, 3H), 3.84 (s, 3H), 3.47 (q,  $J$  = 6.4, 2H), 2.89 (td,  $J$  = 12.4, 5.6 Hz, 1H), 2.74 (t,  $J$  = 6.8 Hz, 2H), 2.57 (dd,  $J$  = 15.0, 5.6 Hz, 1H), 2.13 (dd,  $J$  = 15.0, 6.8 Hz, 1H), 1.99 (s, 3H); <sup>13</sup>C NMR (101 MHz, CDCl<sub>3</sub>)  $\delta$  193.8, 175.0, 170.5, 149.0, 147.6, 131.3, 120.6, 111.9, 111.3, 104.2, 71.36, 55.9, 55.8, 40.8, 40.6, 35.2, 32.7, 20.9; HRMS ESI Calcd for C<sub>18</sub>H<sub>23</sub>NO<sub>5</sub> [M+H]<sup>+</sup>: 334.1649, Found: 334.1648.

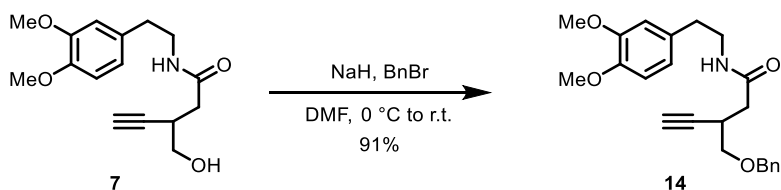

The compound **7** (7.93 g, 27.2 mmol, 1.0 equiv.) was dissolved in DMF (270 mL), NaH (1.30 g, 32.6 mmol, 1.2 equiv.) was added to the mixture under 0 °C, the mixture was stirred at this temperature for 0.5 h, then added BnBr (3.55 mL, 29.9 mmol, 3 equiv.) dropwise to the mixture, raised to room temperature and the reaction was stirred at this temperature until completion (monitored by TLC). Quenched with saturated NH<sub>4</sub>Cl aqueous, the mixture was diluted with water and extracted with Et<sub>2</sub>O, washed with brine, dried over anhydrous sodium sulfate and concentrated under reduced pressure. The residue was purified by silica gel column chromatography (petroleum ether/ethyl acetate, 2/1) to afford the product **14** as a yellow oil, 91%.

**Substrate 3-((benzyloxy)methyl)-N-(3,4-dimethoxyphenethyl)pent-4-ynamide (14).** <sup>1</sup>H NMR (400 MHz, CDCl<sub>3</sub>)  $\delta$  7.36 – 7.28 (m, 5H), 6.79 (d,  $J$  = 8.0 Hz, 0H), 6.72 (d,  $J$  = 7.2 Hz, 2H), 5.81 (q,  $J$  = 4.8 Hz, 1H), 4.53 (s, 2H), 3.86 (s, 3H), 3.85 (s, 3H), 3.57 – 3.43 (m, 4H), 3.20 – 3.13 (m, 1H), 2.73 (t,  $J$  = 6.8 Hz, 2H), 2.50 (dd,  $J$  = 14.4, 6.0 Hz, 1H), 2.34 (dd,  $J$  = 14.4, 8.4 Hz, 0H), 2.10 (d,  $J$  = 2.4 Hz, 1H); <sup>13</sup>C NMR (101 MHz, CDCl<sub>3</sub>)  $\delta$  170.1, 148.6, 147.2, 137.6, 131.1, 128.1, 127.4, 127.3, 120.3, 111.6, 111.0, 83.7, 72.7, 71.3, 70.4, 55.6, 55.5, 40.5, 38.4, 34.9, 28.8; HRMS ESI Calcd for C<sub>23</sub>H<sub>27</sub>NO<sub>4</sub> [M+H]<sup>+</sup>: 382.2013, Found: 382.2015.

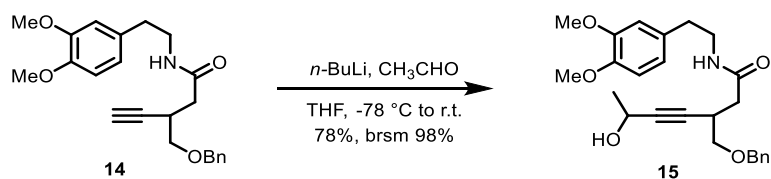

The compound **14** (0.77g, 2.0 mmol, 1.0 equiv.) was dissolved in THF (25 mL) under Ar, *n*-BuLi in hexane (2.5 M, 1.7 mL, 4.2 mmol, 2.1 equiv.) was added to the solution dropwise at -78 °C. Then added CH<sub>3</sub>CHO in THF (0.6 mL, 10.0 mmol, 5 equiv.) to the mixture after 0.5 h, and the reaction was raised to the room temperature after another 0.5 h, the mixture was stirred at this temperature for 12 h. Quenched with saturated NH<sub>4</sub>Cl aqueous, the mixture was diluted with water and extracted with EtOAc, washed with brine, dried over anhydrous sodium sulfate and concentrated under reduced pressure. The residue was purified by silica gel column chromatography (petroleum ether/ethyl acetate, 1/1; petroleum ether/ethyl acetate/DCM/MeOH, 10/10/10/1) to afford the product **15** as a yellow oil, yield 59%, brsm 98%.

**Substrate 3-((benzyloxy)methyl)-*N*-(3,4-dimethoxyphenethyl)-6-hydroxyhpt-4-ynamide (15).** <sup>1</sup>H NMR (400 MHz, CDCl<sub>3</sub>) δ 7.36 – 7.28 (m, 5H), 6.79 (d, *J* = 8.8 Hz, 1H), 6.73 – 6.70 (m, 2H), 5.96 – 5.93 (m, 1H), 4.51 (s, 2H), 4.45 (q, *J* = 7.6, 6.8 Hz, 1H), 3.86 (s, 3H), 3.84 (s, 3H), 3.56 – 3.43 (m, 4H), 3.14 (qd, *J* = 7.2, 2.0 Hz, 1H), 2.73 (t, *J* = 7.2 Hz, 2H), 2.49 (dd, *J* = 14.0, 5.6 Hz, 1H), 2.30 (dd, *J* = 14.2, 8.0 Hz, 1H), 1.38 (d, *J* = 6.4 Hz, 3H); <sup>13</sup>C NMR (101 MHz, CDCl<sub>3</sub>) δ 170.7, 149.0, 147.6, 137.8, 131.3, 128.4, 127.7, 127.6, 111.9, 111.4, 85.0, 83.3, 72.9, 71.7, 58.1, 55.9, 55.8, 40.7, 39.0, 35.2, 29.3, 29.3, 24.4; **HRMS ESI** Calcd for C<sub>25</sub>H<sub>31</sub>NO<sub>5</sub> [M+H]<sup>+</sup>: 426.2275, Found: 426.2274.

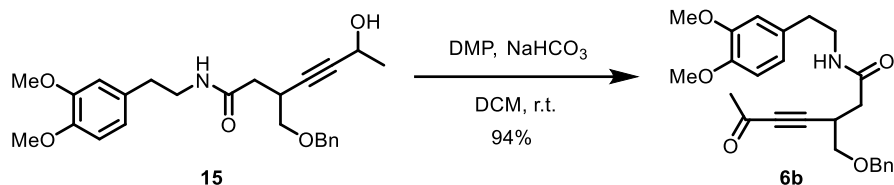

The compound **15** (1.59 g, 3.7 mmol, 1.0 equiv.) was dissolved in DCM (30 mL), NaHCO<sub>3</sub> (0.94g, 11.2 mmol, 3.0 equiv.) and DMP (2.37 g, 5.60 mmol, 1.5 equiv.) was added to the reaction and the mixture was stirred at room temperature until completion (monitored by TLC). Then Na<sub>2</sub>S<sub>2</sub>O<sub>3</sub> aqueous was added to the mixture and stirred until the solution was clear, the mixture was diluted with water and extracted with EtOAc, washed with brine, dried over anhydrous sodium sulfate and concentrated under reduced pressure. The residue was purified by silica gel column chromatography (petroleum ether/ethyl acetate, 1/1) to afford the product **6b** as a yellow oil, yield 94%.

**3-((benzyloxy)methyl)-*N*-(3,4-dimethoxyphenethyl)-6-oxohept-4-ynamide (6b).** <sup>1</sup>H NMR (400 MHz, CDCl<sub>3</sub>) δ 7.37 – 7.28 (m, 5H), 6.79 (d, *J* = 8.8 Hz, 1H), 6.72 – 6.70 (m, 2H), 5.72 (t, *J* = 6.0 Hz, 1H), 4.52 (s, 1H), 3.86 (s, 1H), 3.85 (s, 1H), 3.60 – 3.53 (m, 2H), 3.50 – 3.43 (m, 2H), 3.40 – 3.34 (m, 1H), 2.73 (t, *J* = 7.2 Hz, 2H), 2.52 (dd, *J* = 14.8, 6.4 Hz, 1H), 2.38 (dd, *J* = 14.6, 7.2 Hz, 1H), 2.30 (s, 3H); <sup>13</sup>C NMR (101 MHz, CDCl<sub>3</sub>) δ 184.4, 169.6, 149.0, 147.6, 137.6, 131.1, 128.4, 127.8, 127.6, 120.5, 111.8, 111.3, 92.4, 82.3, 73.1, 70.5, 55.8, 55.8, 40.7, 37.8, 35.1, 32.7, 29.4; **HRMS ESI** Calcd for C<sub>25</sub>H<sub>29</sub>NO<sub>5</sub> [M+H]<sup>+</sup>: 424.2118, Found: 424.2121.

**Table SI-3 Optimization of the reaction conditions.** <sup>a,b</sup>

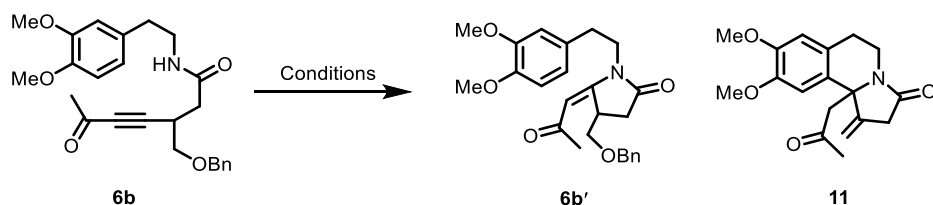

| Entry | Conditions                                           | Results                        |
|-------|------------------------------------------------------|--------------------------------|
| 1     | 1 equiv. <i>p</i> -TsOH·H <sub>2</sub> O, 30 °C, DCE | 17% <b>6b'</b> , 11% <b>11</b> |
| 2     | 1 equiv. <i>p</i> -TsOH, 30 °C, DCE                  | 13% <b>6b'</b> , 8% <b>11</b>  |

|   |                                                                 |                                |
|---|-----------------------------------------------------------------|--------------------------------|
| 3 | 1 equiv. TfOH·H <sub>2</sub> O, 30 °C, DCE                      | N.R.                           |
| 4 | 1 equiv. <i>p</i> -TsOH·H <sub>2</sub> O, 30 °C, DCM            | 17% <b>6b'</b> , 15% <b>11</b> |
| 5 | 1 equiv. <i>p</i> -TsOH·H <sub>2</sub> O, 50 °C, DCM            | 15% <b>6b'</b> , 8% <b>11</b>  |
| 6 | 1 equiv. <i>p</i> -TsOH·H <sub>2</sub> O, 30 °C, THF            | N.R.                           |
| 7 | 1 equiv. <i>p</i> -TsOH·H <sub>2</sub> O, 30 °C, MeOH           | N.R.                           |
| 8 | 1 equiv. <i>p</i> -TsOH·H <sub>2</sub> O, 30 °C, <i>i</i> -PrOH | N.R.                           |

<sup>a</sup>Reaction conditions: **6b** (0.1 mmol, 1.0 equiv.), acid (0.1 mmol, 1.0 equiv.), solvent (4 mL). <sup>b</sup>The yield was determined upon isolation of the target product.

**Substrate (E)-4-((benzyloxy)methyl)-1-(3,4-dimethoxyphenethyl)-5-(2-oxopropylidene) pyrrolidin-2-one (6b')** was obtained as a yellow oil. <sup>1</sup>H NMR (600 MHz, CDCl<sub>3</sub>) δ 7.33 – 7.30 (m, 2H), 7.26 – 7.24 (m, 3H), 6.78 (d, *J* = 9.0 Hz, 1H), 6.73 (dd, *J* = 5.6, 1.8 Hz, 2H), 5.60 (s, 1H), 4.50 (d, *J* = 12.6 Hz, 1H), 4.45 (d, *J* = 12.0 Hz, 1H), 4.06 (dt, *J* = 10.2, 5.4 Hz, 1H), 3.88 (s, 3H), 3.85 (s, 3H), 3.80 (ddd, *J* = 13.8, 8.4, 6.6 Hz, 1H), 3.68 (dd, *J* = 9.0, 3.6 Hz, 2H), 3.63 (ddd, *J* = 14.1, 9.6, 6.0 Hz, 1H), 3.56 (dd, *J* = 9.0, 5.4 Hz, 1H), 2.80 – 2.72 (m, 2H), 2.58 – 2.57 (m, 3H), 2.18 (s, 3H); <sup>13</sup>C NMR (151 MHz, CDCl<sub>3</sub>) δ 196.2, 176.3, 161.0, 149.1, 147.9, 138.0, 130.4, 128.3, 127.6, 127.5, 120.7, 112.0, 111.3, 99.9, 72.9, 71.6, 55.9, 55.9, 41.7, 37.3, 32.6, 32.2, 31.9; HRMS ESI Calcd for C<sub>25</sub>H<sub>29</sub>NO<sub>5</sub> [M+H]<sup>+</sup>: 424.2118, Found: 424.2121.

**Substrate 8,9-dimethoxy-1-methylene-10b-(2-oxopropyl)-1,5,6,10b-tetrahydro-*ro*pyrrolo [2,1-*a*] isoquinolin-3(2H)-one (11)** was obtained as a light-yellow oil. <sup>1</sup>H NMR (400 MHz, CDCl<sub>3</sub>) δ 6.88 (s, 1H), 6.56 (s, 1H), 5.52 (t, *J* = 2.4 Hz, 1H), 5.33 (d, *J* = 2.8 Hz, 1H), 4.41 (ddd, *J* = 13.2, 7.0, 2.0 Hz, 1H), 3.87 (s, 3H), 3.85 (s, 3H), 3.36 – 3.29 (m, 1H), 3.16 – 3.14 (m, 3H), 3.13 – 3.08 (m, 1H), 3.05 – 3.00 (m, 1H), 2.67 – 2.62 (m, 1H), 2.10 (s, 3H); <sup>13</sup>C NMR (101 MHz, CDCl<sub>3</sub>) δ 204.1, 172.1, 148.4, 147.4, 144.8, 130.0, 125.8, 111.9, 110.4, 108.0, 65.8, 56.0, 55.8, 52.8, 37.8, 34.8, 31.3, 27.1.; HRMS ESI Calcd for C<sub>18</sub>H<sub>21</sub>NO<sub>4</sub> [M+H]<sup>+</sup>: 316.1543, Found: 316.1541.

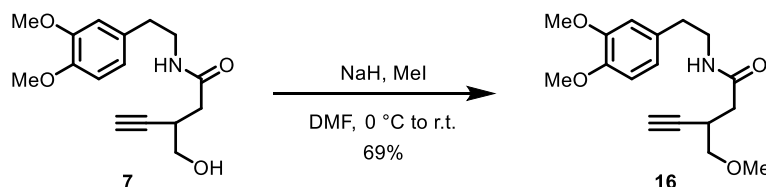

The compound **7** (1.9 g, 6.5 mmol, 1.0 equiv.) was dissolved in DMF (65 mL), NaH (0.3 g, 7.8 mmol, 1.2 equiv.) was added to the mixture under 0 °C, the mixture was stirred at this temperature for 0.5 h, then added MeI (2.0 mL/4.6 g, 32.5 mmol, 5 equiv.) dropwise to the mixture, raised to room temperature and the reaction was stirred at this temperature until completion (monitored by TLC). Quenched with saturated NH<sub>4</sub>Cl aqueous, the mixture was diluted with water and extracted with Et<sub>2</sub>O, washed with brine, dried over anhydrous sodium sulfate and concentrated under reduced pressure. The residue was purified by silica gel column chromatography (petroleum ether/ethyl acetate, 2/1) to afford the product **16** as a yellow oil, 69%.

**Substrate *N*-(3,4-dimethoxyphenethyl)-3-(methoxymethyl) pent-4-ynamide**

**(16).**  $^1\text{H NMR}$  (400 MHz,  $\text{CDCl}_3$ )  $\delta$  6.79 (d,  $J = 8.4$  Hz, 1H), 6.73 (d,  $J = 7.2$  Hz, 2H), 5.76 (s, 1H), 3.86 (s, 3H), 3.85 (s, 3H), 3.51 (qd,  $J = 7.0, 2.4$  Hz, 2H), 3.46 – 3.39 (m, 2H), 3.34 (s, 3H), 3.16 – 3.08 (m, 1H), 2.76 (t,  $J = 7.2$  Hz, 2H), 2.44 (dd,  $J = 14.4, 6.0$  Hz, 1H), 2.31 (dd,  $J = 14.4, 8.0$  Hz, 1H), 2.09 (d,  $J = 2.4$  Hz, 1H);  $^{13}\text{C NMR}$  (101 MHz,  $\text{CDCl}_3$ )  $\delta$  170.3, 149.0, 147.7, 131.2, 120.6, 111.8, 111.3, 83.9, 74.0, 70.6, 58.9, 55.9, 55.8, 40.7, 38.7, 35.2, 28.9; **HRMS ESI** Calcd for  $\text{C}_{17}\text{H}_{23}\text{NO}_4$   $[\text{M}+\text{H}]^+$ : 306.1700, Found: 306.1698.

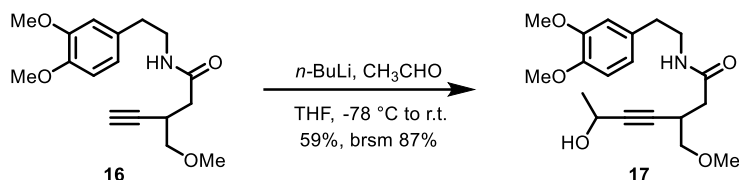

The compound **16** (0.76g, 2.5 mmol, 1.0 equiv.) was dissolved in THF (25 mL) under Ar, *n*-BuLi in hexane (2.5 M, 2.1 mL, 5.3 mmol, 2.1 equiv.) was added to the solution dropwise at  $-78$  °C. Then added  $\text{CH}_3\text{CHO}$  in THF (5 M, 2.5 mL, 12.5 mmol, 5 equiv.) to the mixture after 0.5 h, and the reaction was raised to the room temperature after another 0.5 h, the mixture was stirred at this temperature for 12 h. Quenched with saturated  $\text{NH}_4\text{Cl}$  aqueous, the mixture was diluted with water and extracted with EtOAc, washed with brine, dried over anhydrous sodium sulfate and concentrated under reduced pressure. The residue was purified by silica gel column chromatography (petroleum ether/ethyl acetate, 1/1; petroleum ether/ethyl acetate/DCM/MeOH, 10/10/10/1) to afford the product **17** as a yellow oil, yield 59%, brsm 87%.

**Substrate N-(3,4-dimethoxyphenethyl)-6-hydroxy-3-(methoxymethyl)hept-4-ynamide (17).**  $^1\text{H NMR}$  (400 MHz,  $\text{CDCl}_3$ )  $\delta$  6.80 (d,  $J = 8.8$  Hz, 1H), 6.73 (d,  $J = 6.4$  Hz, 2H), 5.93 (s, 1H), 4.45 (q,  $J = 6.8$  Hz, 1H), 3.86 (s, 3H), 3.85 (s, 3H), 3.50 (q,  $J = 6.8$  Hz, 2H), 3.44 – 3.35 (m, 2H), 3.32 (s, 3H), 3.11 (q,  $J = 5.6$  Hz, 1H), 2.76 (t,  $J = 6.8$  Hz, 2H), 2.43 (dd,  $J = 14.4, 5.6$  Hz, 1H), 2.27 (dd,  $J = 14.2, 8.0$  Hz, 1H), 1.37 (d,  $J = 6.8$  Hz, 3H);  $^{13}\text{C NMR}$  (101 MHz,  $\text{CDCl}_3$ )  $\delta$  170.7, 149.0, 147.6, 131.3, 120.6, 111.9, 111.3, 84.9, 83.4, 74.2, 58.8, 58.1, 55.9, 55.8, 40.7, 38.9, 35.2, 29.1, 29.1, 24.4; **HRMS ESI** Calcd for  $\text{C}_{19}\text{H}_{27}\text{NO}_5$   $[\text{M}+\text{H}]^+$ : 350.1962, Found: 350.1959.

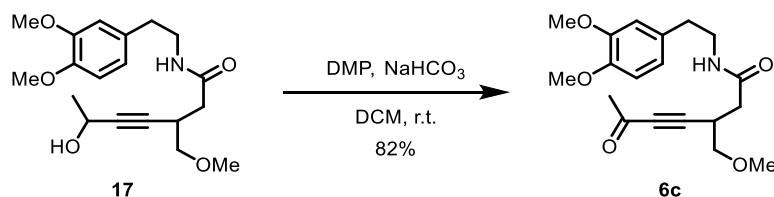

The compound **17** (0.51 g, 1.5 mmol, 1.0 equiv.) was dissolved in DCM (15 mL),  $\text{NaHCO}_3$  (0.37g, 4.5 mmol, 3.0 equiv.) and DMP (0.93 g, 2.3 mmol, 1.5 equiv.) was added to the reaction and the mixture was stirred at room temperature until completion (monitored by TLC). Then  $\text{Na}_2\text{S}_2\text{O}_3$  aqueous was added to the mixture and stirred until the solution was clear, the mixture was diluted with water and extracted with EtOAc, washed with brine, dried over anhydrous sodium sulfate and concentrated under reduced pressure. The residue was purified by silica gel column chromatography (petroleum ether/ethyl acetate, 1/1) to afford the product **6c** as a yellow oil, yield 82%.

**Substrate N-(3,4-dimethoxyphenethyl)-3-(methoxymethyl)-6-oxohept-4-yna -**

**mid** (**6c**).  $^1\text{H NMR}$  (400 MHz,  $\text{CDCl}_3$ )  $\delta$  6.79 (d,  $J = 8.4$  Hz, 1H), 6.71 (d,  $J = 6.4$  Hz, 2H), 5.75 (d,  $J = 6.8$  Hz, 1H), 3.85 (s, 3H), 3.84 (s, 3H), 3.52 – 3.44 (m, 4H), 3.35–3.28 (m, 4H), 2.75 (t,  $J = 7.2$  Hz, 2H), 2.47 (dd,  $J = 14.8, 6.4$  Hz, 1H), 2.35 (dd,  $J = 14.4, 7.6$  Hz, 1H), 2.29 (s, 3H);  $^{13}\text{C NMR}$  (101 MHz,  $\text{CDCl}_3$ )  $\delta$  184.5, 169.6, 148.9, 147.6, 131.0, 120.5, 111.7, 111.2, 92.4, 82.2, 73.0, 58.9, 55.8, 55.8, 40.7, 37.7, 35.1, 32.7, 29.2; **HRMS ESI** Calcd for  $\text{C}_{19}\text{H}_{25}\text{NO}_5$   $[\text{M}+\text{H}]^+$ : 348.1805, Found: 348.1804.

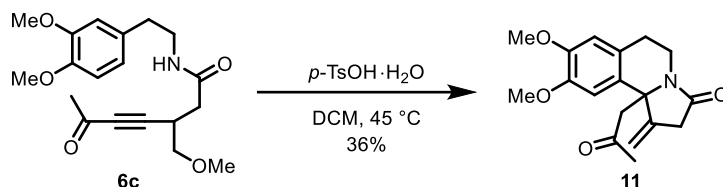

The compound **6c** (194 mg, 0.56 mmol, 1.0 equiv.) was dissolved in DCE (10 mL), added *p*-TsOH·H<sub>2</sub>O (144 mg, 0.75 mmol, 1.0 equiv.) to the mixture and stirred at 45 °C until completion (monitored by TLC). Then the reaction was quenched with saturated NaHCO<sub>3</sub> aqueous, the mixture was diluted with water and extracted with DCM, washed with brine, dried over anhydrous sodium sulfate and concentrated under reduced pressure. The residue was purified by silica gel column chromatography (petroleum ether/ethyl acetate/DCM/MeOH, 10/10/10/1) to afford the product **11** as a light-yellow oil, yield 36%.

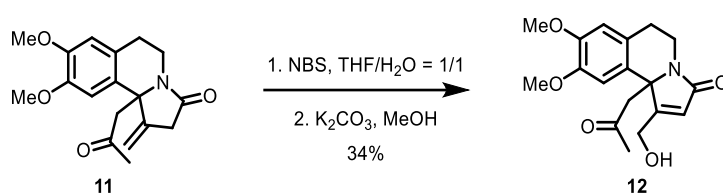

The compound **10** (136 mg, 0.43 mmol, 1.0 equiv.) was dissolved in mixed solvents THF/H<sub>2</sub>O = 1/1 (5 mL), then NBS (92 mg, 0.52 mmol, 1.2 equiv.) was added to the mixture and stirred at room temperature until completion (monitored by TLC). Then the reaction was quenched with saturated NaHCO<sub>3</sub> aqueous, the mixture was diluted with water and extracted with EtOAc, washed with brine, dried over anhydrous sodium sulfate and concentrated under reduced pressure to afford crude product which was used in the next reaction without further purification.

The crude product (10 mg, 0.025 mmol, 1.0 equiv.) was dissolved in MeOH (2 mL), K<sub>2</sub>CO<sub>3</sub> (5 mg, 0.038 mmol, 1.5 equiv.) was added to the mixture and stirred at room temperature for 0.5 h. Then the mixture was diluted with water and extracted with EtOAc, washed with brine, dried over anhydrous sodium sulfate and concentrated under reduced pressure. The residue was purified by silica gel column chromatography (petroleum ether/ethyl acetate, 1/1 to 1/2) to afford the product **12** as a light-yellow oil, 34%.<sup>2</sup>

**Substrate1-(hydroxymethyl)-8,9-dimethoxy-10b-(2-oxopropyl)-6,10b-dihydropyrrolo [2,1-a] isoquinolin-3(5H)-one (**12**).  $^1\text{H NMR}$  (400 MHz,  $\text{CDCl}_3$ )  $\delta$  7.28 (s, 1H), 6.61 (s, 1H), 5.93 (s, 1H), 4.77 (d,  $J = 14.8$  Hz, 1H), 4.66 – 4.60 (m, 1H), 4.52 (dd,  $J = 13.6, 6.0$  Hz, 1H), 4.11 – 4.07 (m, 1H), 3.91 (s, 3H), 3.86 (s, 3H), 3.31 – 3.21 (m, 2H), 2.98 – 2.89 (m, 1H), 2.64 (dd,  $J = 15.8, 4.0$  Hz, 1H), 2.17 (s, 2H);  $^{13}\text{C NMR}$  (101 MHz,  $\text{CDCl}_3$ )  $\delta$  209.3, 170.8, 164.4, 148.5, 148.2, 126.9, 126.0, 123.1,**

111.9, 109.3, 60.1, 56.1, 55.9, 51.9, 35.5, 32.9, 29.7, 29.2; **HRMS ESI** Calcd for  $C_{18}H_{21}NO_5$   $[M+H]^+$ : 332.1492, Found: 332.1491.

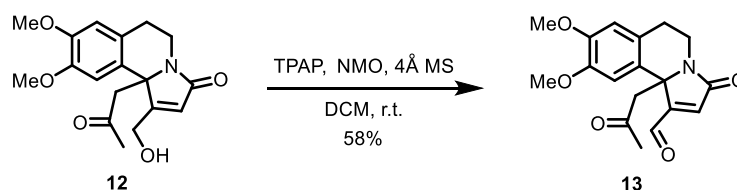

The compound **12** (27 mg, 0.08 mmol, 1.0 equiv.) was dissolved in DCM (2 mL), added NMO (28 mg, 0.24 mmol, 3.0 equiv.) and 4 Å MS to the reaction under 0 °C. Then TPAP (3mg, 0.008mmol, 0.1equiv.) was added to the mixture after 10 minutes and stirred at room temperature until completion (monitored by TLC). After the reaction is completed, the solvent was evaporated under reduced pressure and the residue was purified by silica gel column chromatography (petroleum ether/ethyl acetate, 1/1) to afford the product **13** as a light-yellow oil, 58%.

**Substrate 8,9-dimethoxy-3-oxo-10b-(2-oxopropyl)-3,5,6,10b-tetrahydropyrrolo [2,1-a] isoquinoline-1-carbaldehyde (13).**  $^1\text{H NMR}$  (400 MHz,  $\text{CDCl}_3$ )  $\delta$  10.06 (s, 1H), 7.38 (s, 1H), 6.90 (s, 1H), 6.59 (s, 1H), 4.53 – 4.48 (m, 1H), 3.85 (s, 3H), 3.84 (s, 3H), 3.57 (d,  $J = 15.6$  Hz, 1H), 3.29 (d,  $J = 16.0$  Hz, 1H), 3.27 – 3.21 (m, 1H), 3.05 – 2.96 (m, 1H), 2.67 (dd,  $J = 16.0, 4.4$  Hz, 1H), 2.06 (s, 3H);  $^{13}\text{C NMR}$  (101 MHz,  $\text{CDCl}_3$ )  $\delta$  203.3, 188.3, 168.6, 157.9, 148.5, 147.9, 140.7, 126.9, 125.2, 111.8, 110.1, 66.8, 55.9, 55.8, 49.6, 35.6, 31.7, 28.5; **HRMS ESI** Calcd for  $C_{18}H_{19}NO_5$   $[M+H]^+$ : 330.1336, Found: 330.1338.

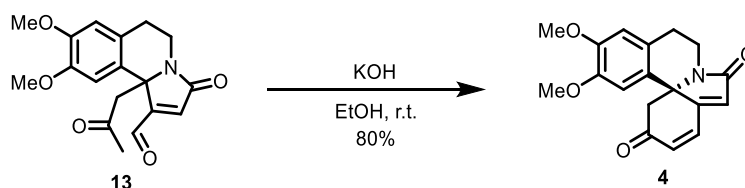

The compound **13** (7 mg, 0.02mmol, 1.0 equiv.) was dissolved in EtOH (1 mL), then KOH (6 mg, 0.10mmol, 10.0 equiv.) was added to the mixture and stirred at room temperature until completion (monitored by TLC). Quenched with saturated  $\text{NH}_4\text{Cl}$  aqueous, the mixture was diluted with water and extracted with EtOAc, washed with brine, dried over anhydrous sodium sulfate and concentrated under reduced pressure, the residue was purified by silica gel column chromatography (petroleum ether/ethyl acetate, 1/2) to afford the product **4** as a colorless oil, yield 80%.

**Substrate (S)-11,12-dimethoxy-8,9-dihydro-1H-indolo [7a,1-a] isoquinoline-2,6-dione (4).**  $^1\text{H NMR}$  (400 MHz,  $\text{CDCl}_3$ )  $\delta$  7.76 (dd,  $J = 10.0, 1.2$  Hz, 1H), 6.85 (s, 1H), 6.66 (s, 1H), 6.42 (d,  $J = 10.0$  Hz, 1H), 6.38 (s, 1H), 4.21 (ddd,  $J = 13.2, 6.6, 4.8$  Hz, 1H), 3.84 (s, 3H), 3.72 (s, 3H), 3.40 (ddd,  $J = 13.0, 8.0, 5.6$  Hz, 1H), 3.27 (d,  $J = 14.8$  Hz, 1H), 3.03 (ddd,  $J = 16.0, 8.8, 6.8$  Hz, 1H), 2.86 – 2.79 (m, 2H).  $^{13}\text{C NMR}$  (101 MHz,  $\text{CDCl}_3$ )  $\delta$  195.2, 169.7, 154.8, 148.8, 147.3, 138.5, 131.9, 128.1, 126.0, 125.6, 112.5, 107.9, 67.7, 55.9, 55.9, 52.5, 36.9, 27.7; **HRMS ESI** Calcd for  $C_{18}H_{17}NO_4$   $[M+H]^+$ : 312.1230, Found: 312.1227.

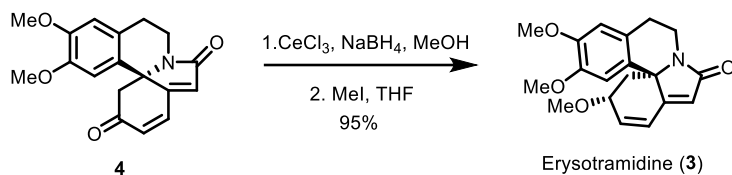

A 10-mL sealed tube with a magnetic stir bar was charged with **4** (6 mg, 0.016 mmol, 1.0 equiv.) and  $\text{CeCl}_3 \cdot 7\text{H}_2\text{O}$  (18 mg, 0.048 mmol, 3.0 equiv.) in MeOH (1 mL). Then  $\text{NaBH}_4$  (2 mg, 0.048 mmol, 3.0 equiv.) was added to the mixture at 0 °C. The mixture was stirred for 5 min and quenched with water (1 mL). Then the mixture was extracted with DCM, washed with brine, dried over anhydrous sodium sulfate and concentrated under reduced pressure to afford crude alcohol which was used in the next reaction without further purification.

A 10-mL sealed tube with a magnetic stir bar was charged with the crude product (5 mg, 0.016 mmol, 1.0 equiv), KOH (9 mg, 0.160 mmol, 10.0 equiv) and  $\text{Et}_4\text{NBr}$  (7  $\mu\text{l}$ , 0.048 mmol, 5.0 equiv) in THF (1 mL). Then  $\text{CH}_3\text{I}$  (10  $\mu\text{l}$ , 0.160 mmol, 10 equiv) was added to the mixture and stirred at room temperature until completion (monitored by TLC). The reaction was quenched with water (1 mL) and extracted with DCM, washed with brine, dried over anhydrous sodium sulfate and concentrated under reduced pressure. The residue was purified by silica gel column chromatography (petroleum ether/ethyl acetate, 1/1) to afford the product Erysotramidine (**3**) as a colorless oil, yield 95%.<sup>3-5</sup>

**Substrate (13bS)-2,11,12-trimethoxy-1,2,8,9-tetrahydro-6H-indolo [7a,1-a] isoquinolin-6-one (3).**  $^1\text{H NMR}$  (400 MHz,  $\text{CDCl}_3$ )  $\delta$  6.91 (dd,  $J = 10.0, 2.4$  Hz, 1H), 6.80 (s, 1H), 6.72 (s, 1H), 6.33 (dt,  $J = 10.4, 1.6$  Hz, 1H), 6.03 (s, 1H), 4.01 (ddd,  $J = 12.8, 8.4, 7.2$  Hz, 1H), 3.87 (s, 3H), 3.84 – 3.83 (m, 1H), 3.77 (s, 3H), 3.62 (ddd,  $J = 12.8, 7.2, 5.6$  Hz, 1H), 3.35 (s, 3H), 3.13 – 3.05 (m, 1H), 3.03 – 2.98 (m, 1H), 2.81 (ddd,  $J = 11.6, 5.2, 1.2$  Hz, 1H), 1.72 (dd,  $J = 11.6, 10.0$  Hz, 1H);  $^{13}\text{C NMR}$  (101 MHz,  $\text{CDCl}_3$ )  $\delta$  171.0, 157.0, 148.6, 147.0, 136.3, 128.7, 126.6, 124.2, 120.3, 112.2, 108.2, 74.9, 66.4, 56.4, 56.1, 55.9, 41.4, 37.3, 27.1.



## 6. References

- 1 Malová Križková, P., Lindner, W., Hammerschmidt, F. *Synthesis* **2018**, 50 (03), 651–657.
- 2 Peng, Y., Yang, J.-H., Li, W.-D. *Z. Tetrahedron* **2006**, 62 (6), 1209–1215.
- 3 Gao, S., Tu, Y. Q., Hu, X., Wang, S., Hua, R., Jiang, Y., Zhao, Y., Fan, X., Zhang, S. *Org. Lett.* **2006**, 8 (11), 2373–2376.
- 4 Tietze, L. F., Tölle, N., Kratzert, D., Stalke, D. *Org. Lett.* **2009**, 11 (22), 5230–5233.
- 5 L'Homme, C., Ménard, M.-A., Canesi, S. *J. Org. Chem.* **2014**, 79 (17), 8481–8485.

## 7. NMR Spectra of New Compound

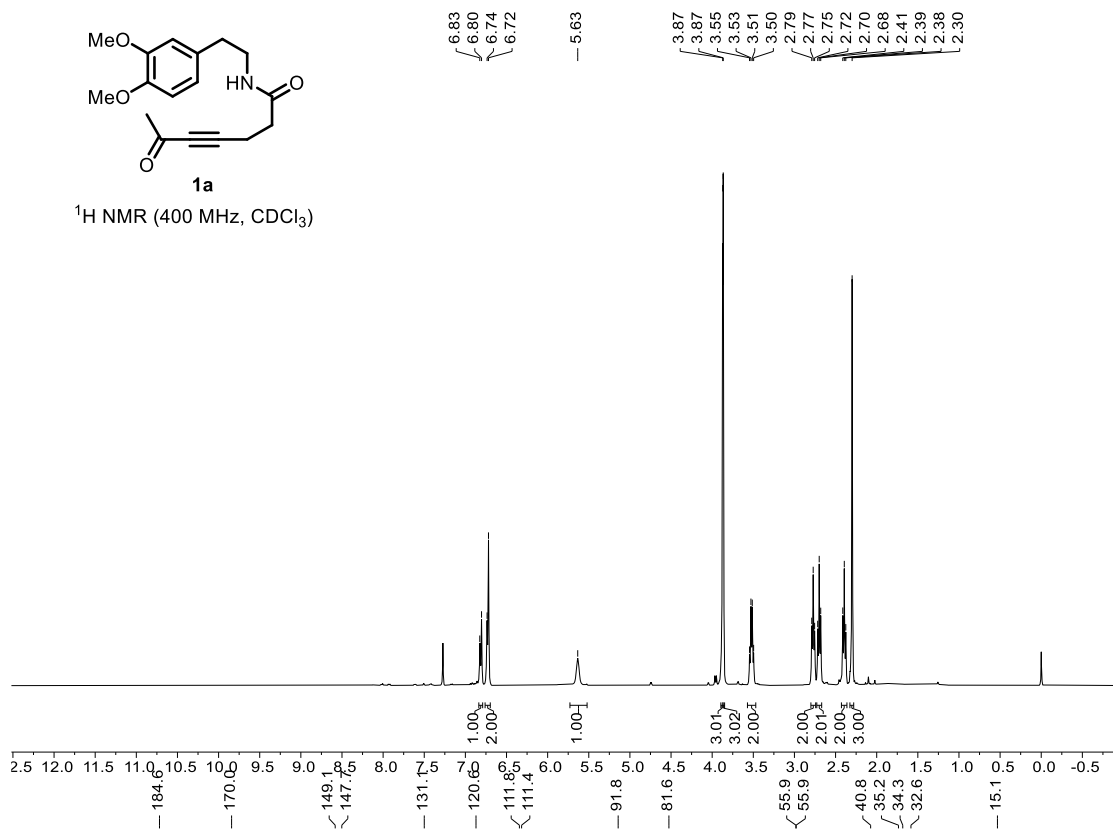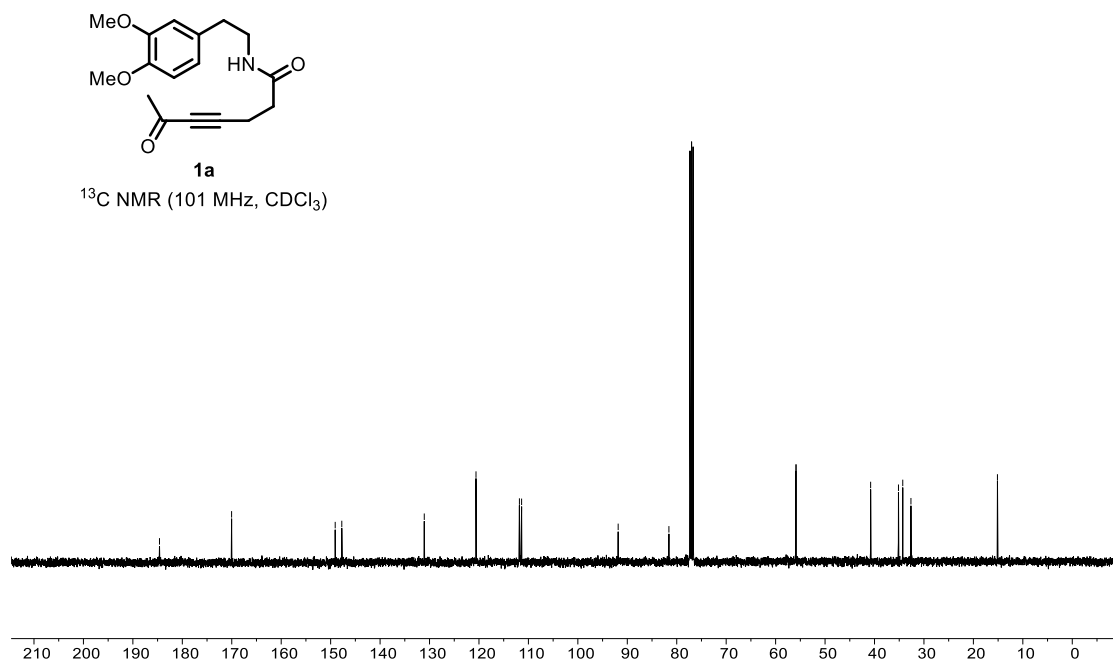

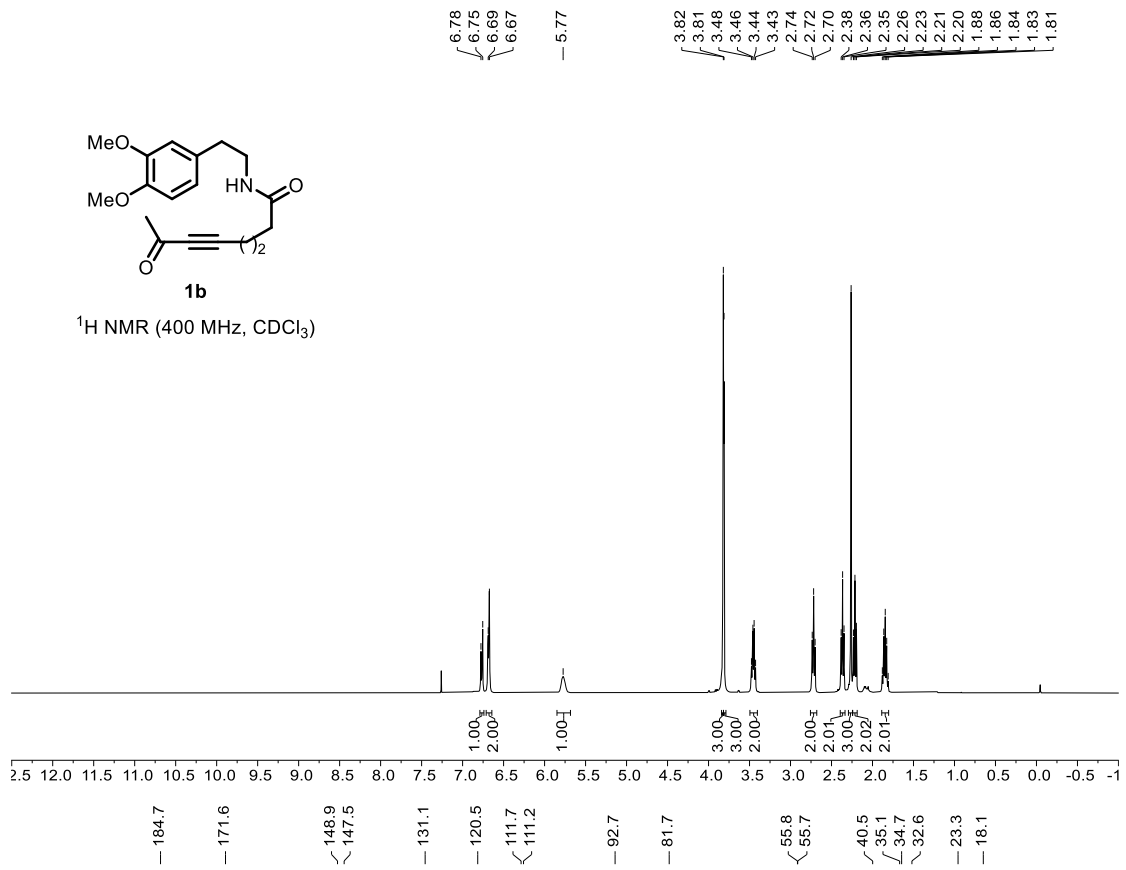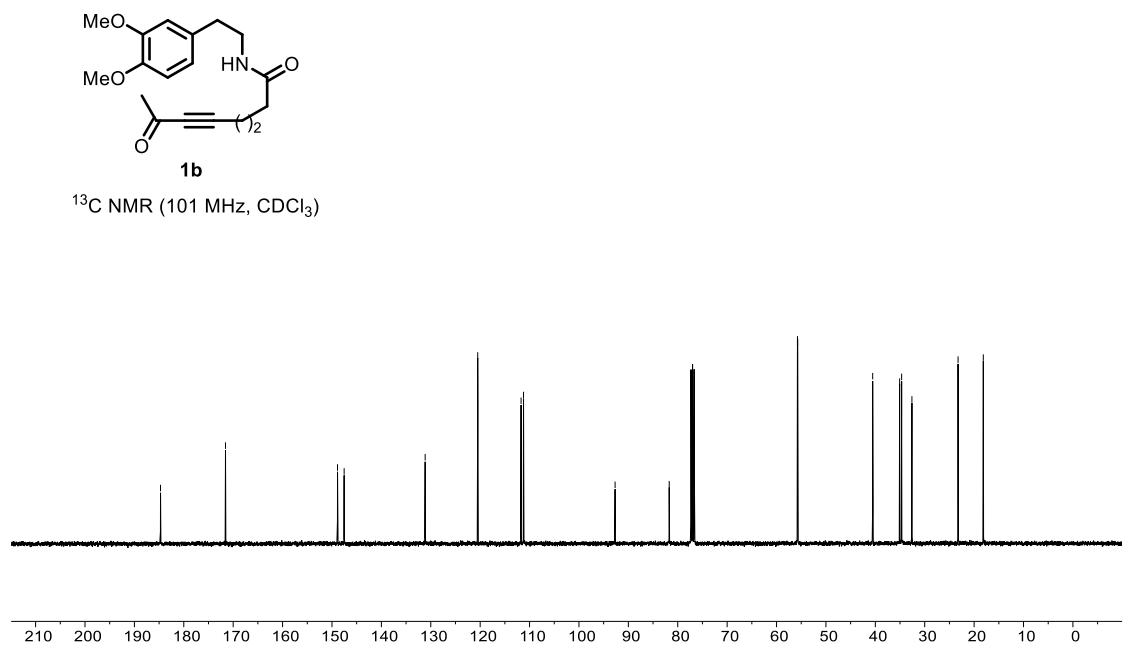

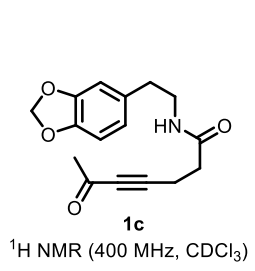

6.72  
 6.70  
 6.65  
 6.61  
 6.59  
 5.90  
 5.87  
 3.47  
 3.45  
 3.43  
 3.42  
 2.72  
 2.70  
 2.69  
 2.68  
 2.66  
 2.64  
 2.39  
 2.38  
 2.36  
 2.27

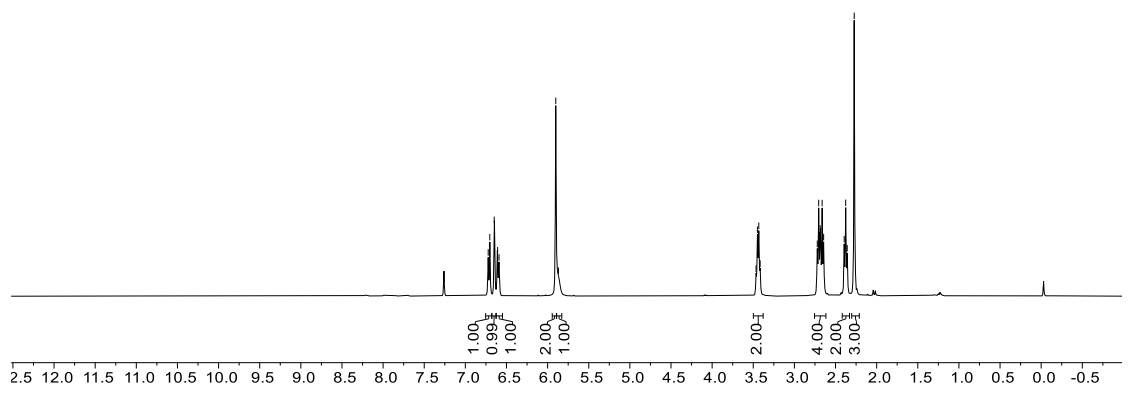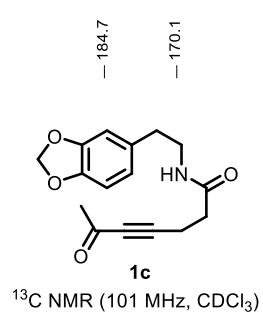

184.7  
 170.1  
 147.7  
 146.1  
 132.3  
 121.5  
 108.9  
 108.3  
 100.8  
 92.0  
 81.4  
 40.8  
 35.2  
 34.1  
 32.6  
 15.0

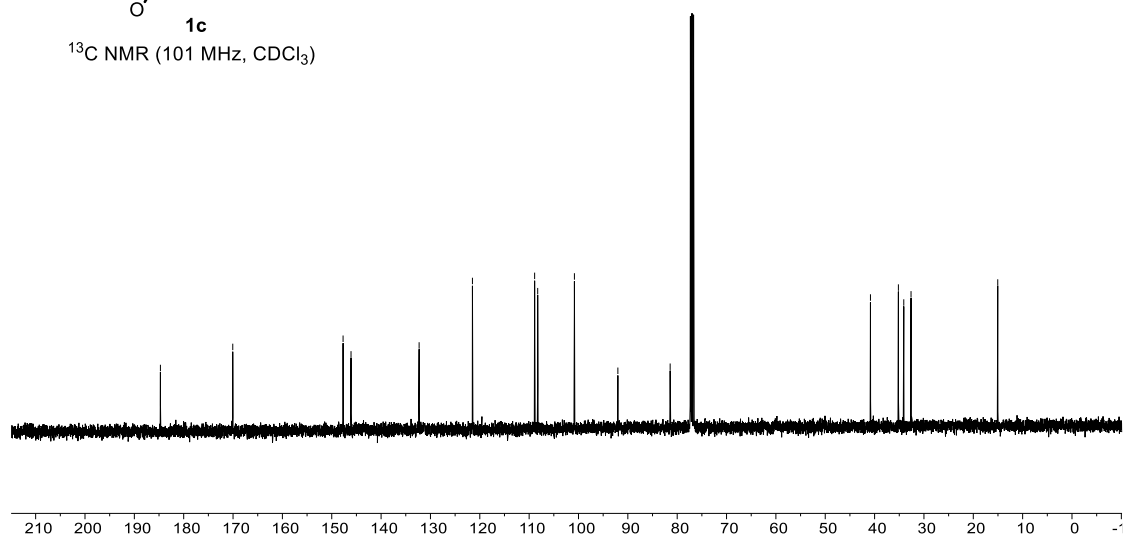

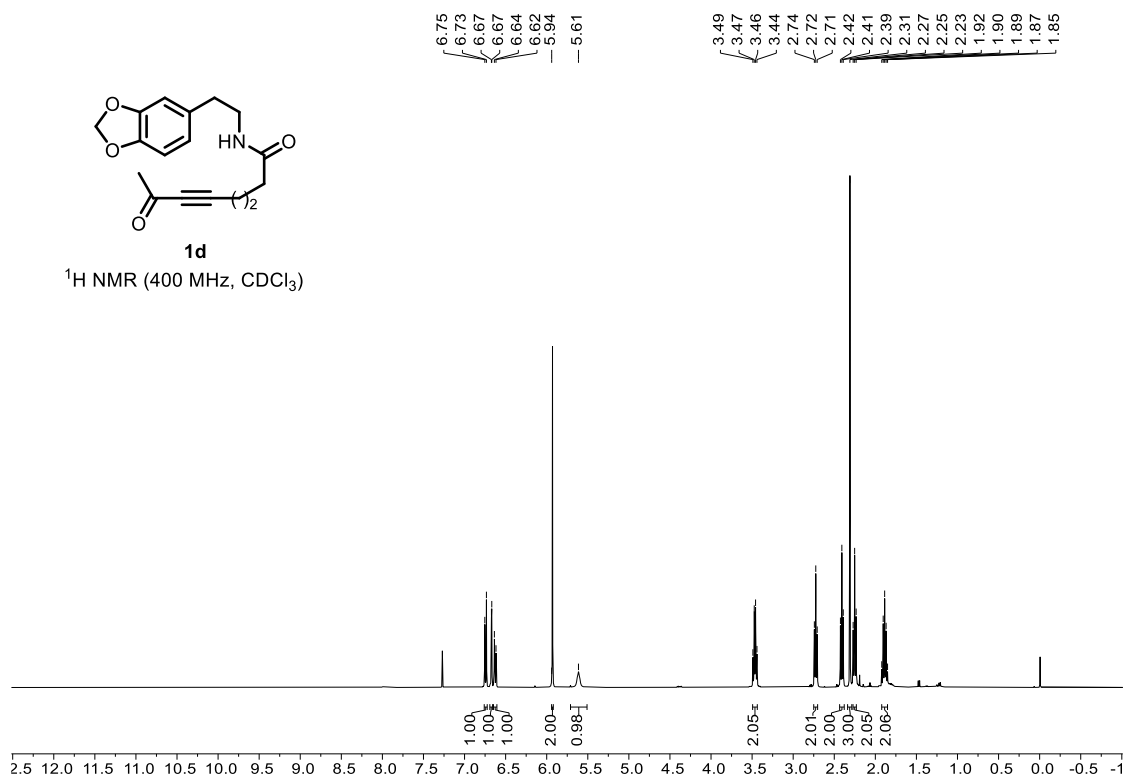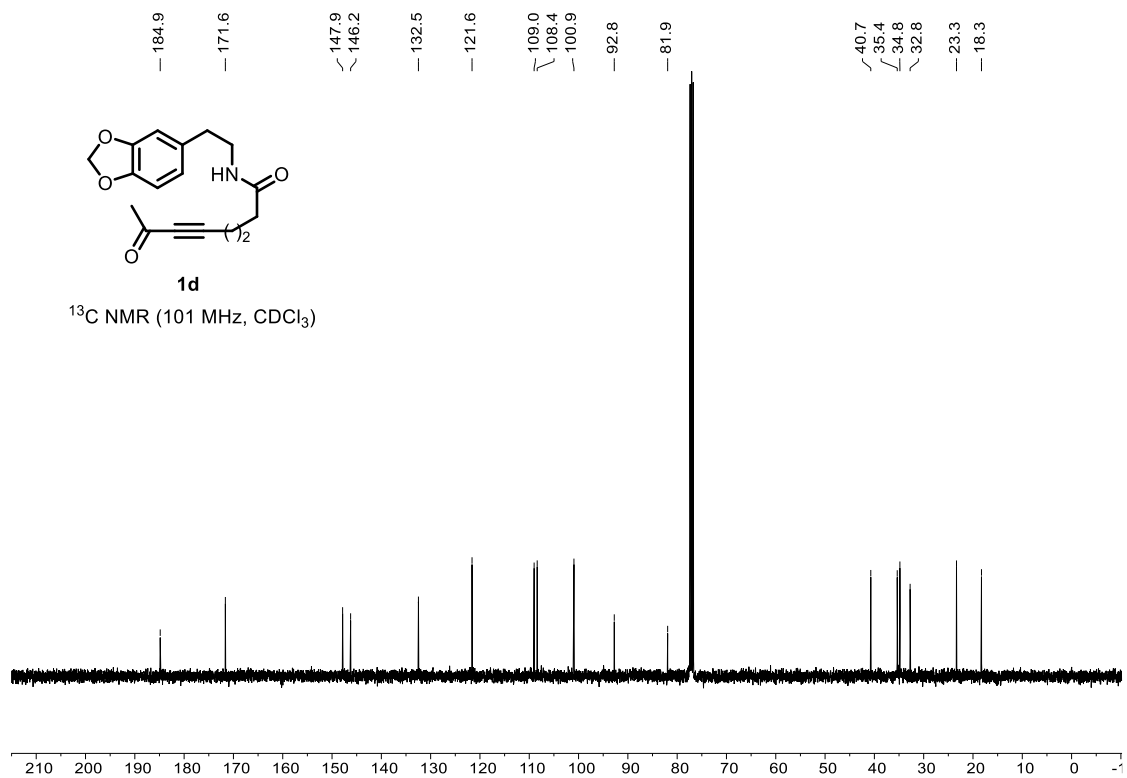

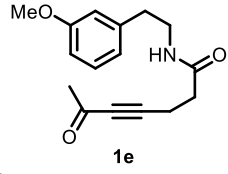

$^1\text{H NMR}$  (400 MHz,  $\text{CDCl}_3$ )

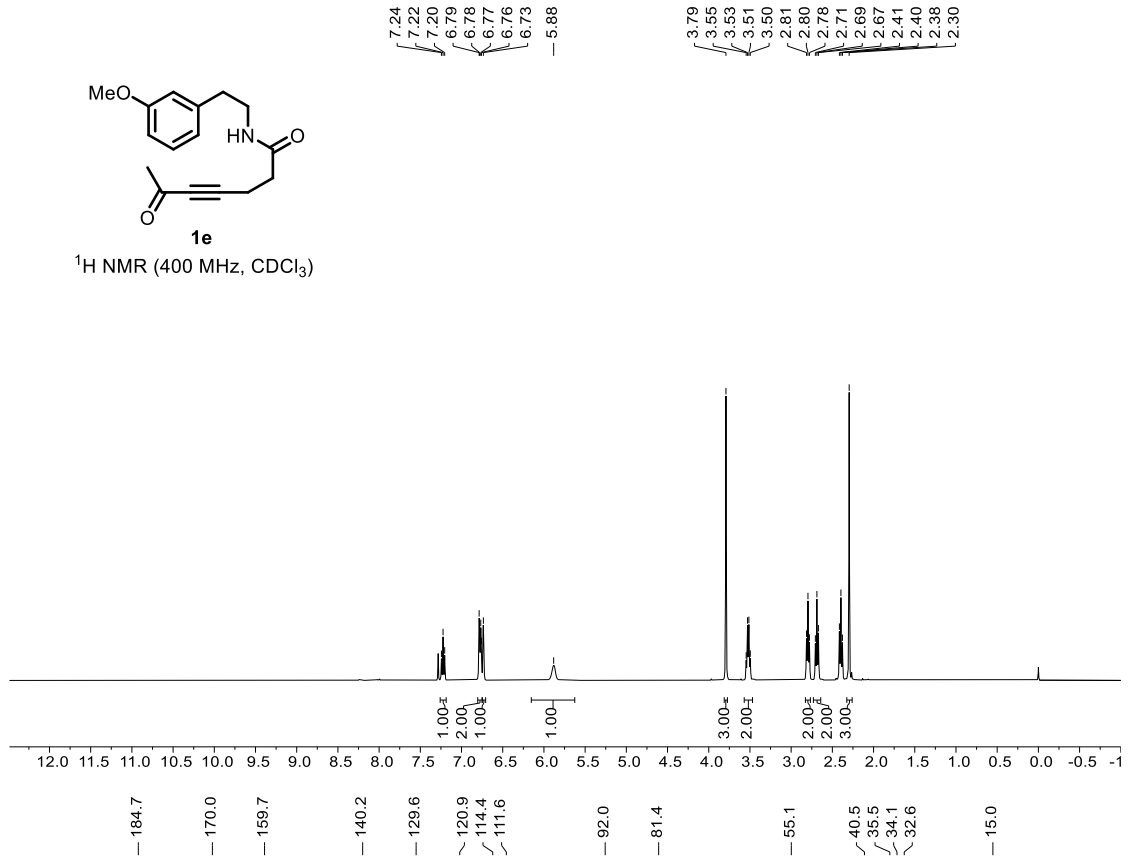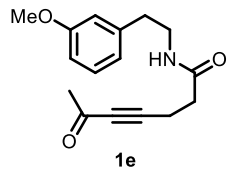

$^{13}\text{C NMR}$  (101 MHz,  $\text{CDCl}_3$ )

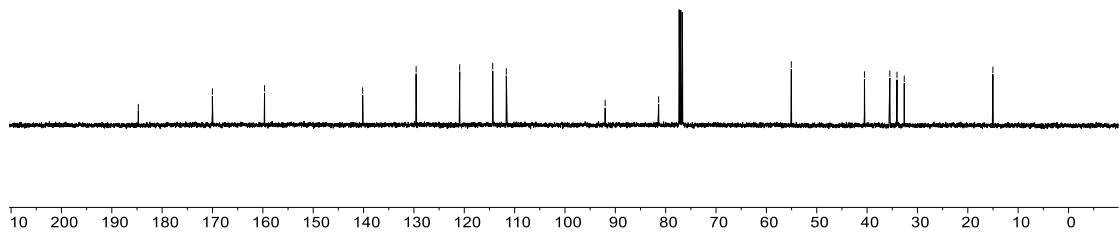

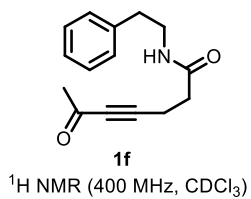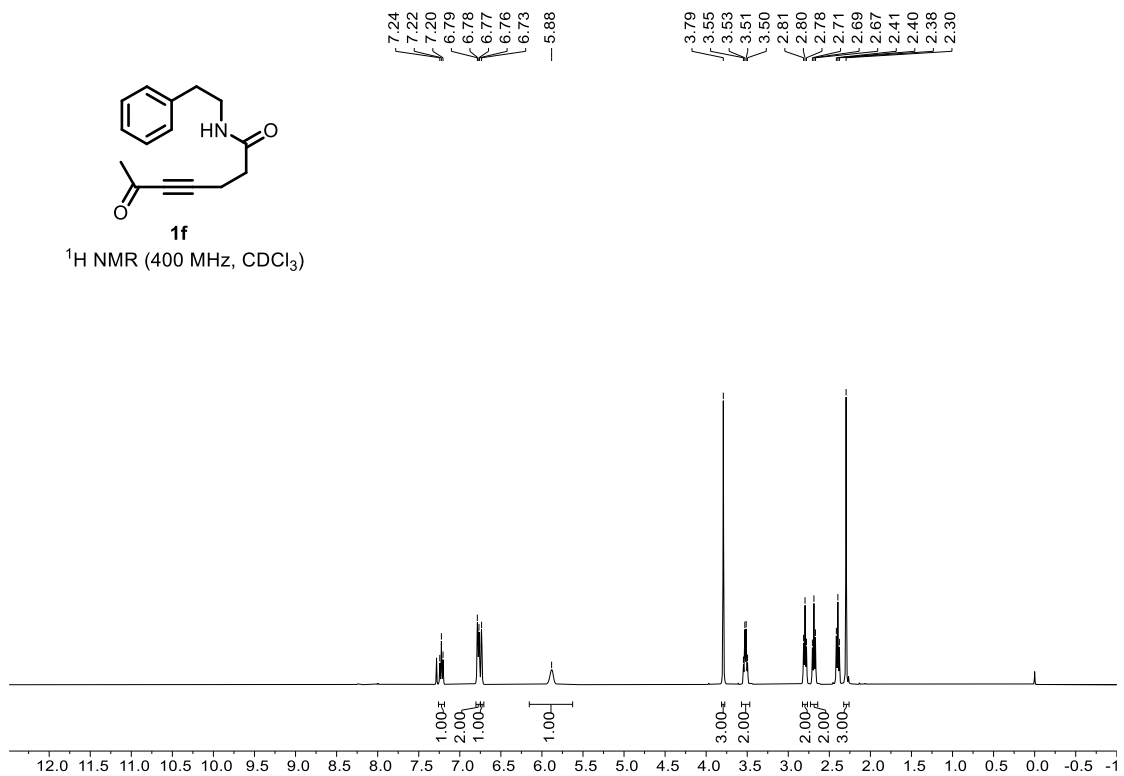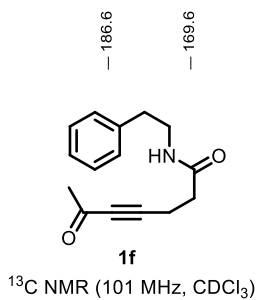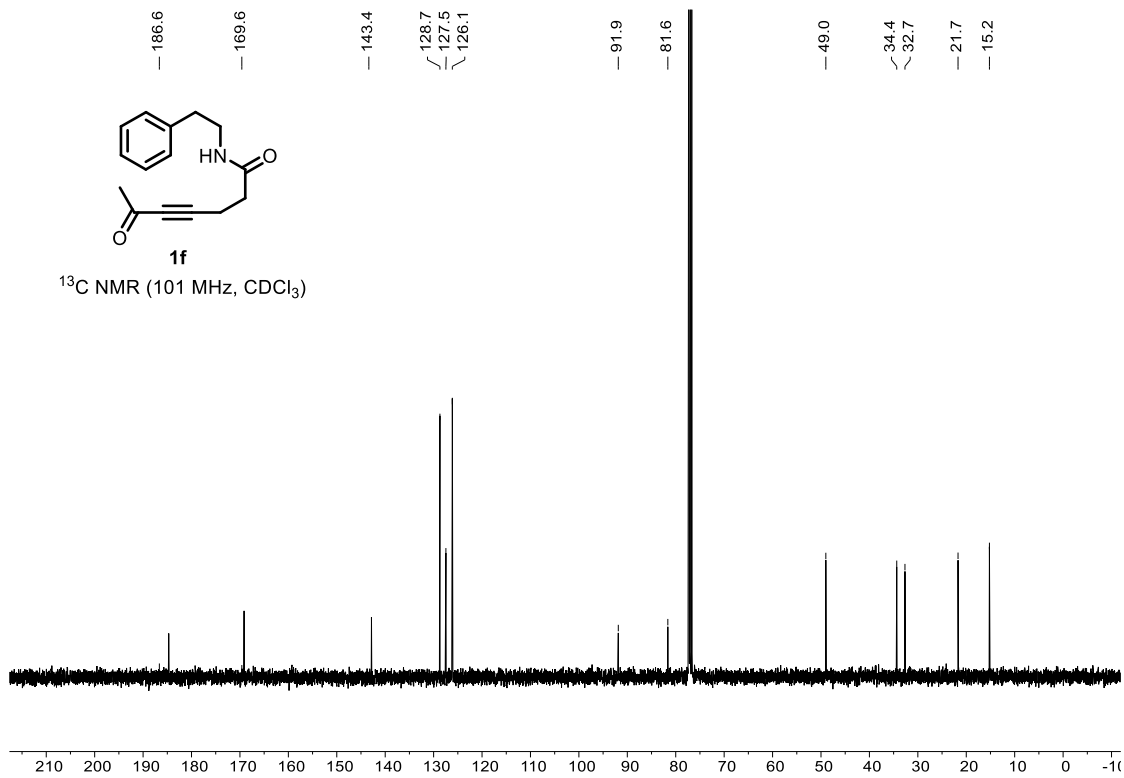

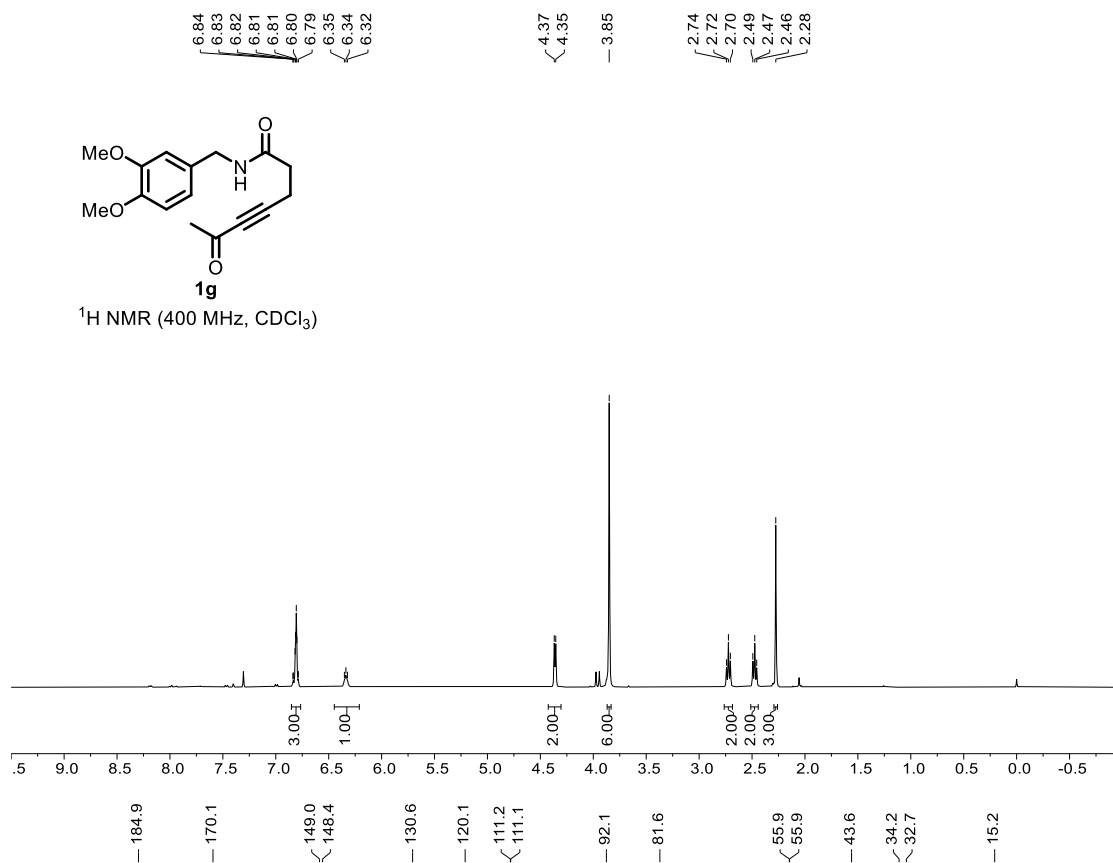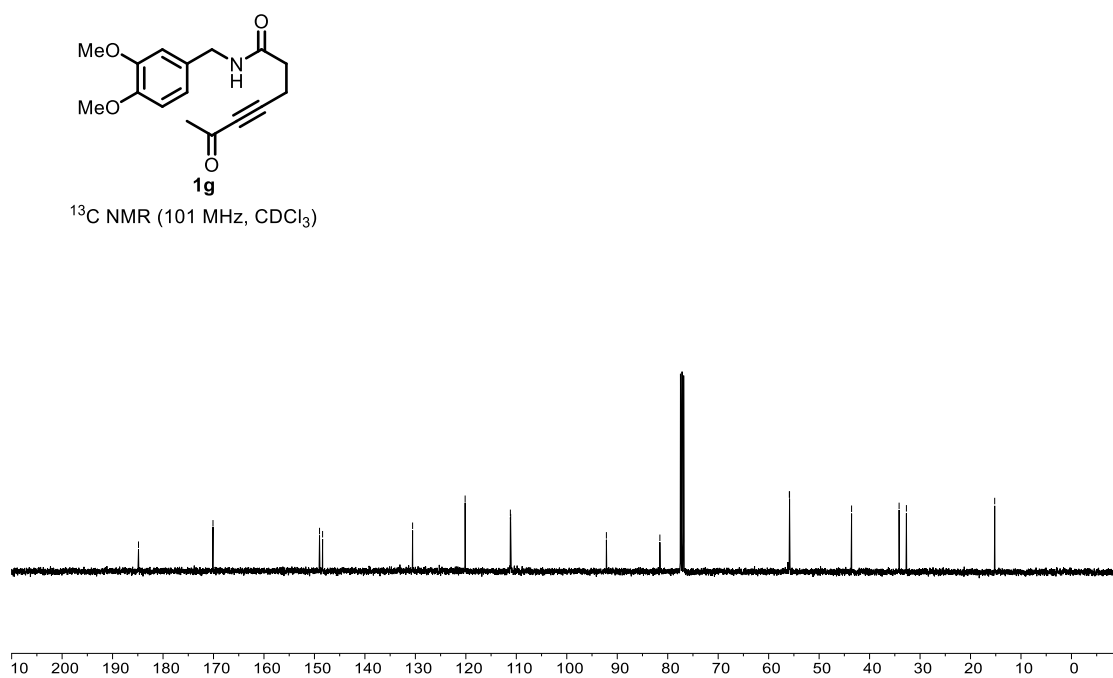



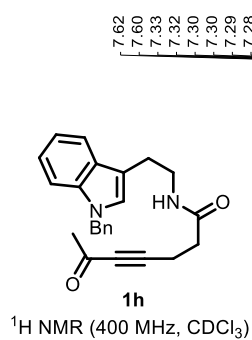

7.62, 7.60, 7.33, 7.32, 7.30, 7.30, 7.29, 7.28, 7.22, 7.22, 7.20, 7.20, 7.18, 7.18, 7.15, 7.15, 7.14, 7.13, 7.13, 7.11, 7.11, 6.98, 5.60, 5.29, 3.63, 3.61, 3.60, 3.58, 3.00, 2.98, 2.96, 2.69, 2.67, 2.65, 2.35, 2.33, 2.31, 2.27

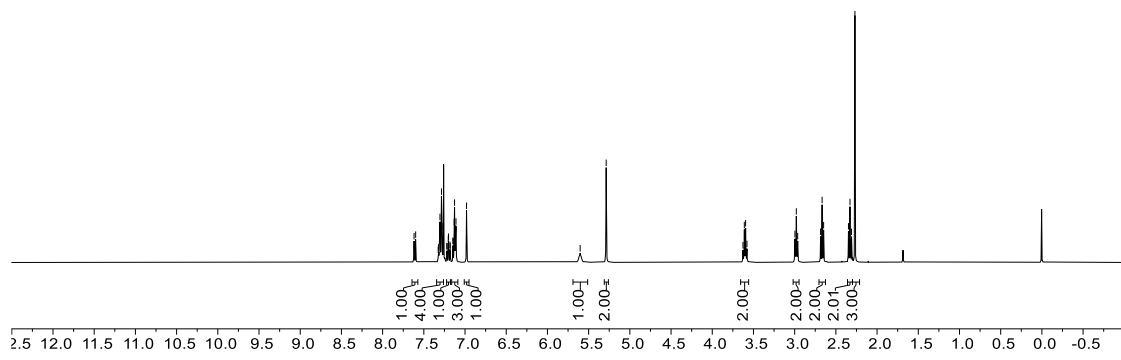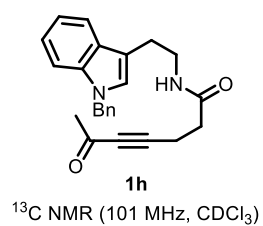

184.8, 169.9, 137.5, 136.7, 128.7, 127.6, 127.6, 126.8, 126.2, 122.0, 119.2, 118.8, 111.9, 109.8, 92.0, 81.5, 49.8, 39.8, 34.2, 32.7, 25.2, 15.1

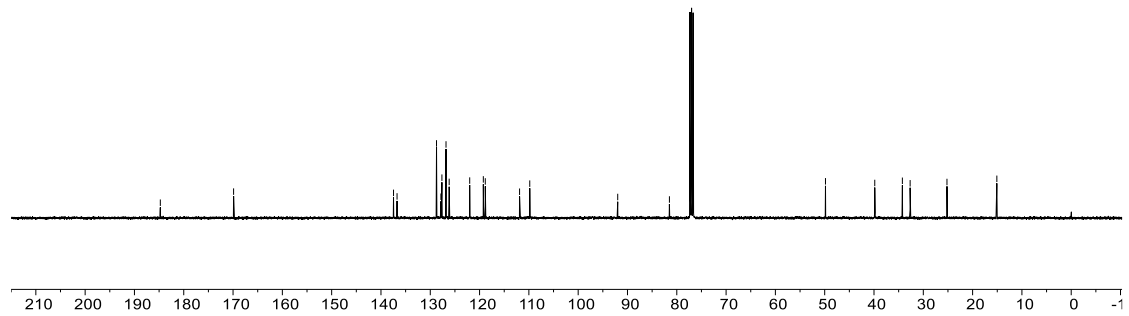

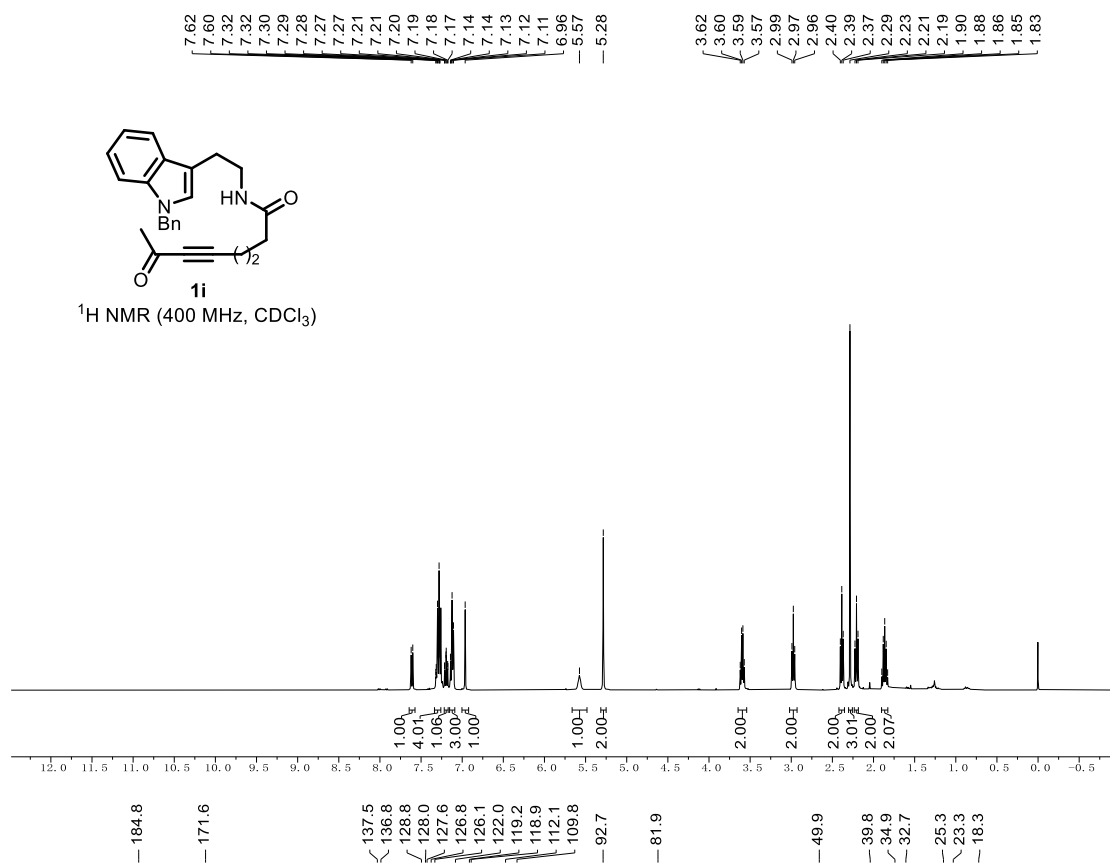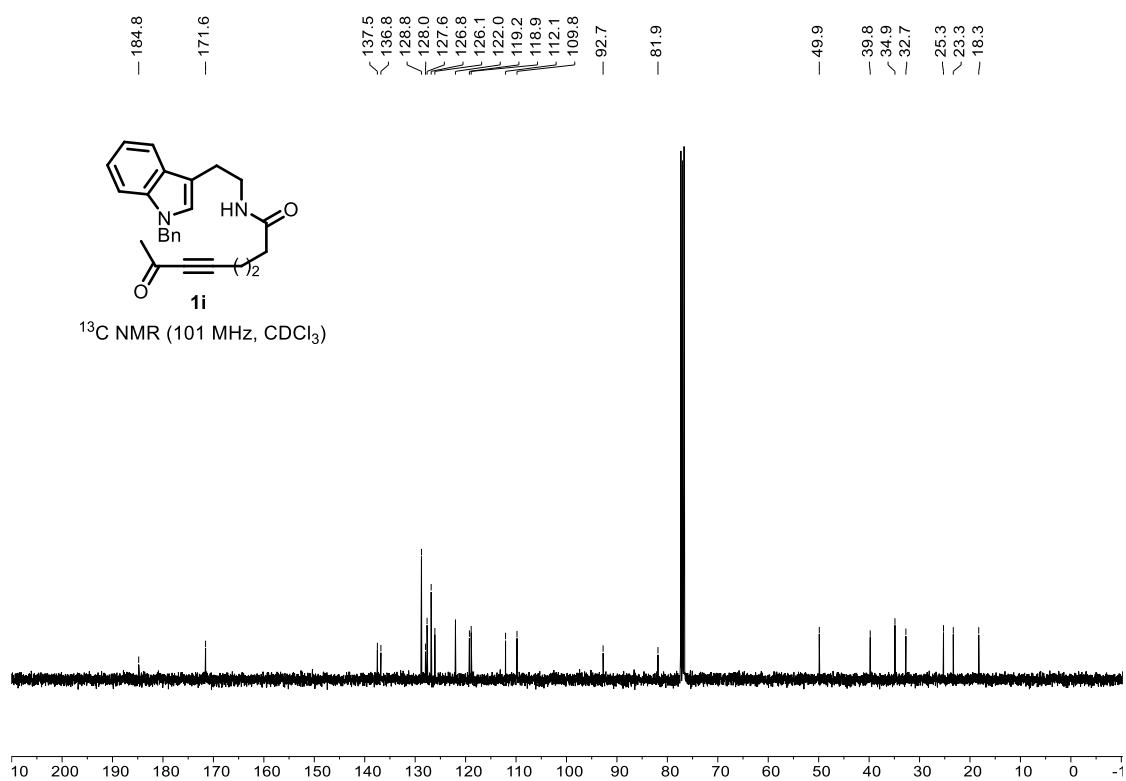

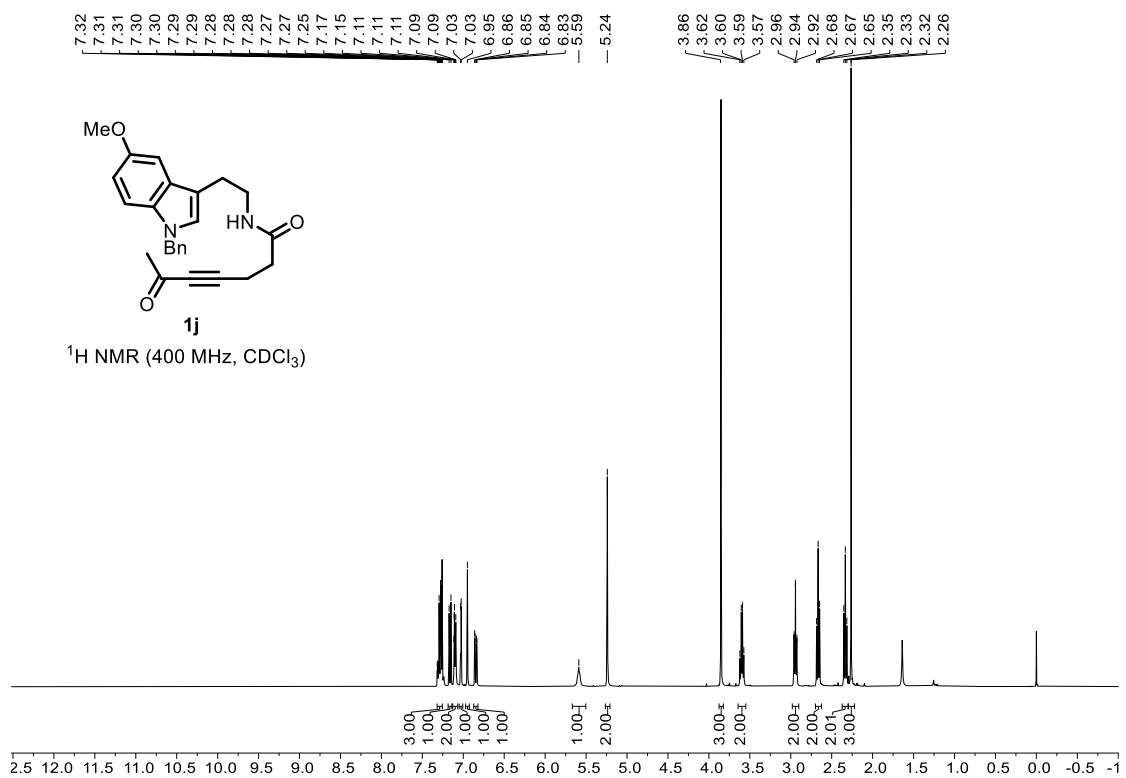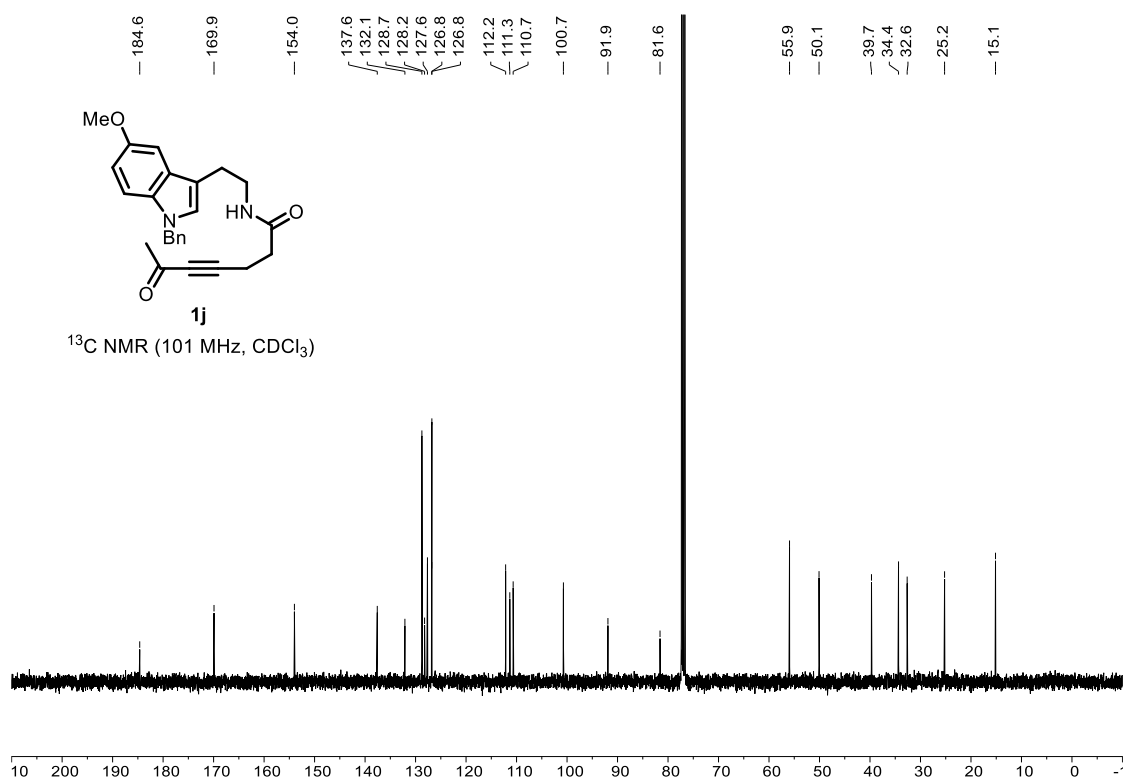

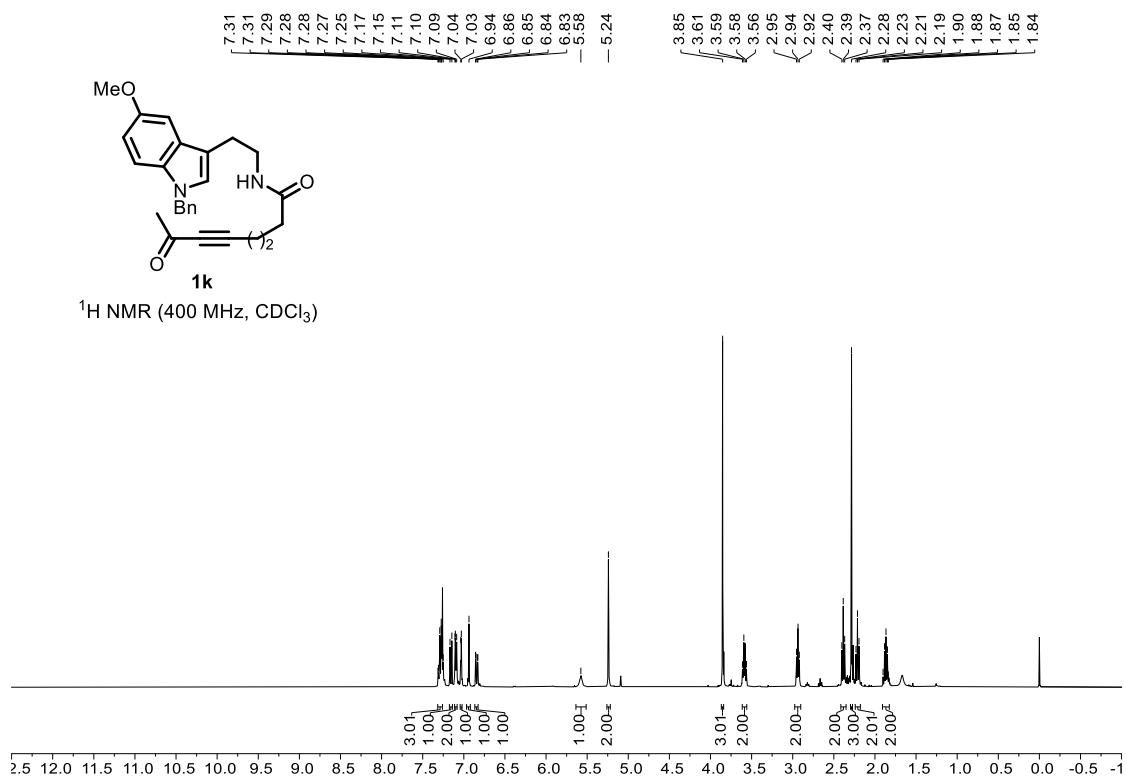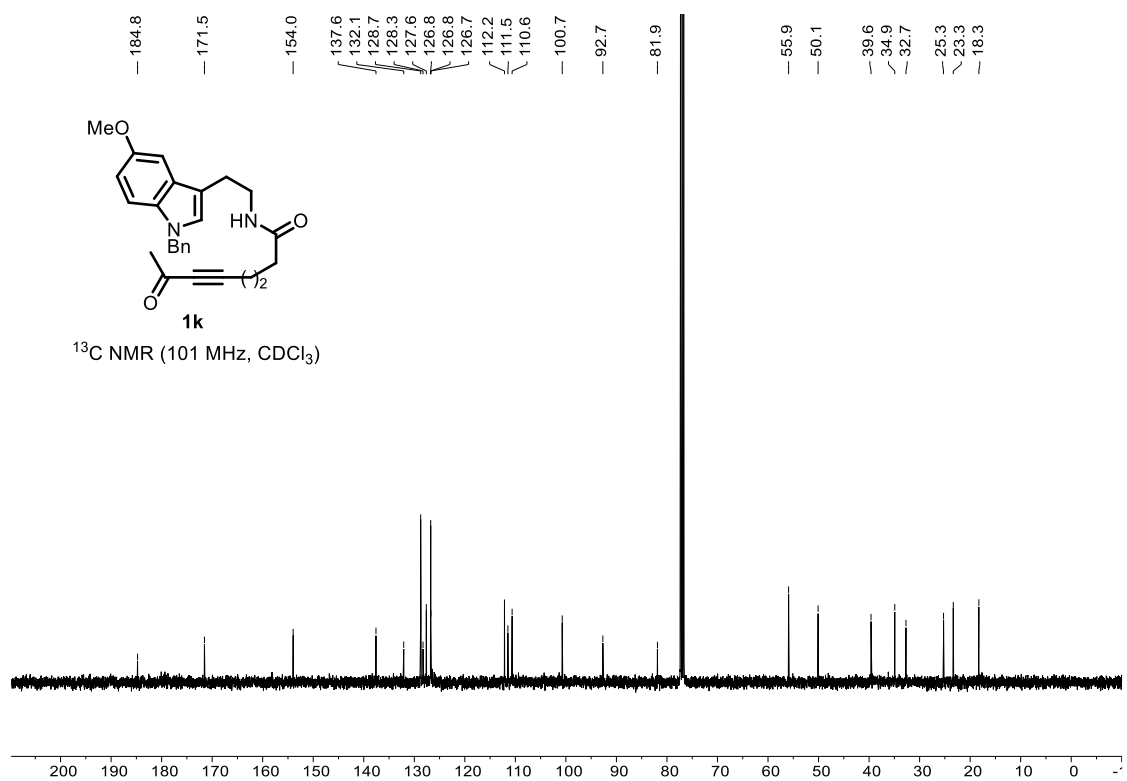

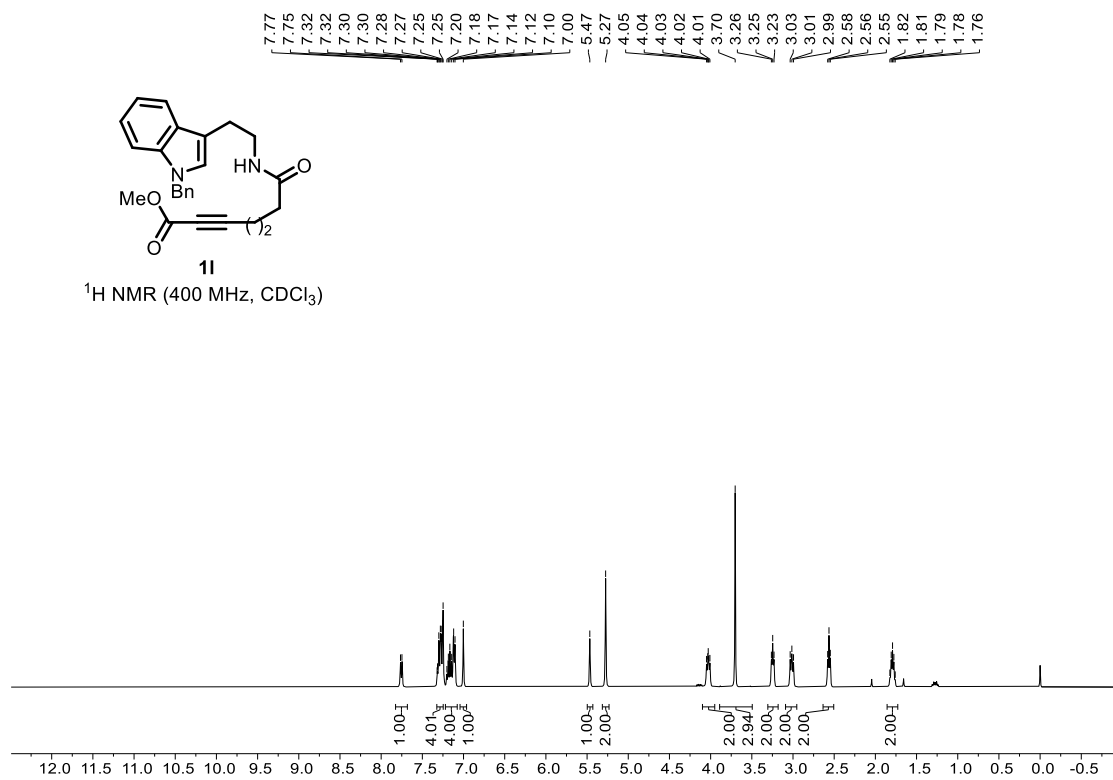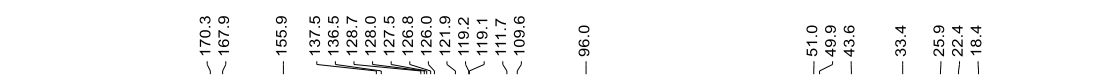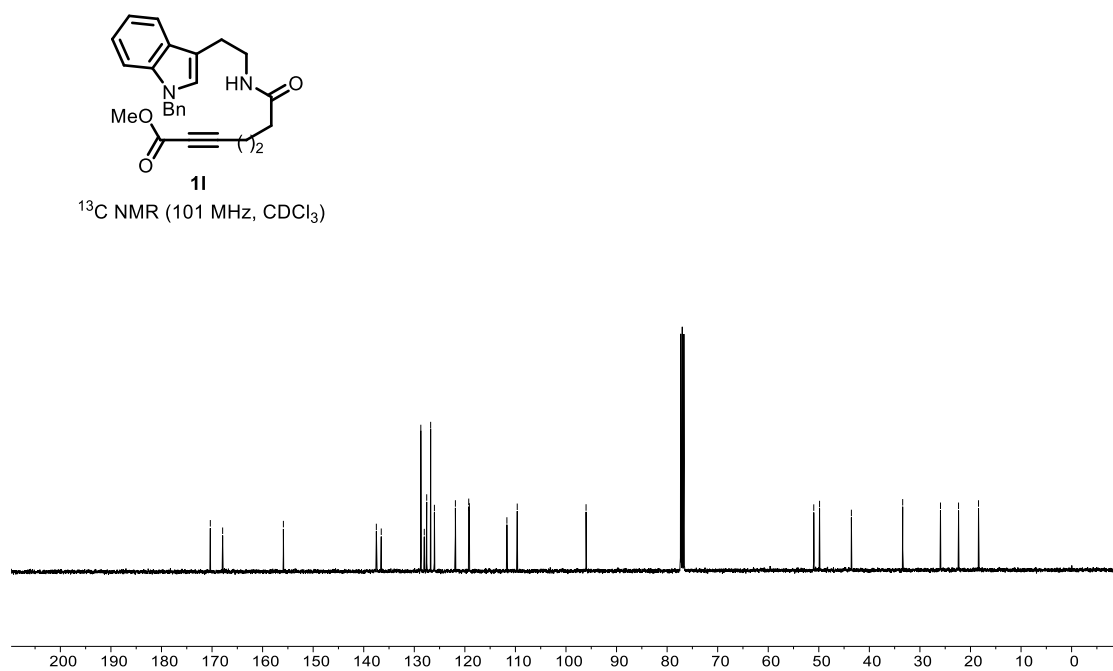



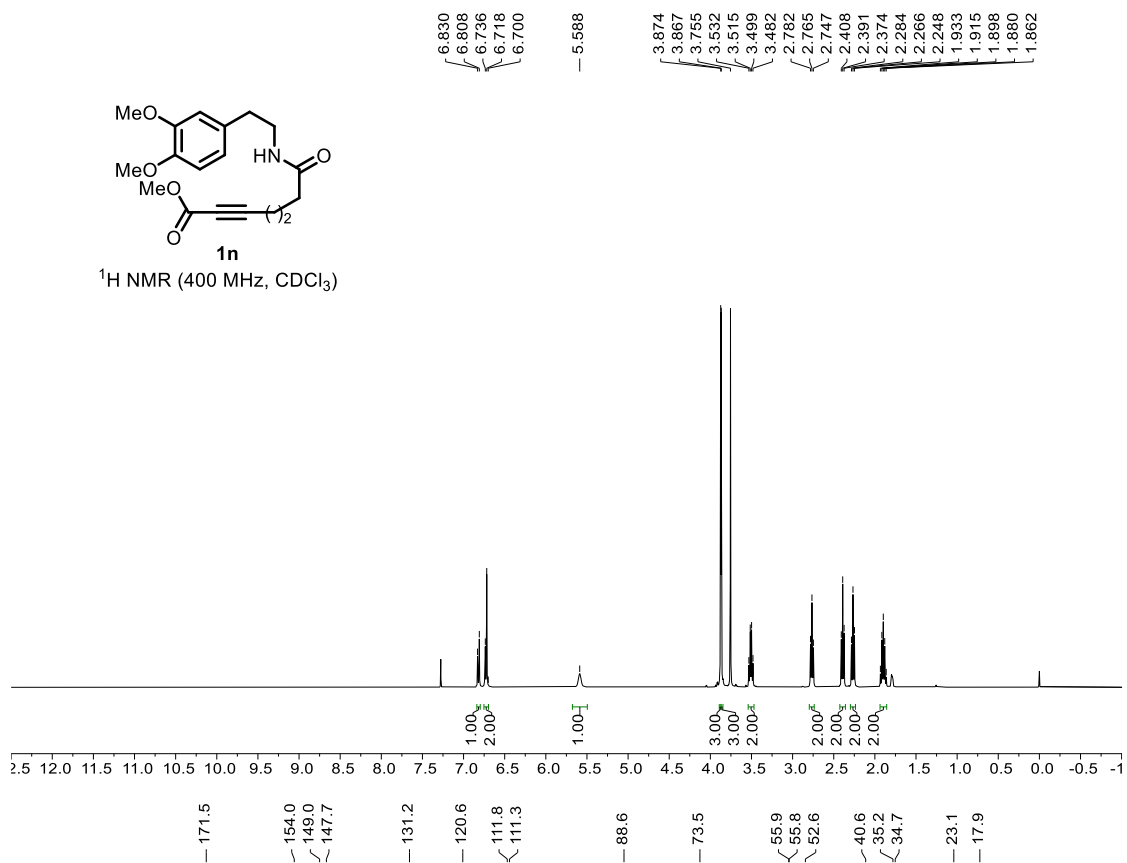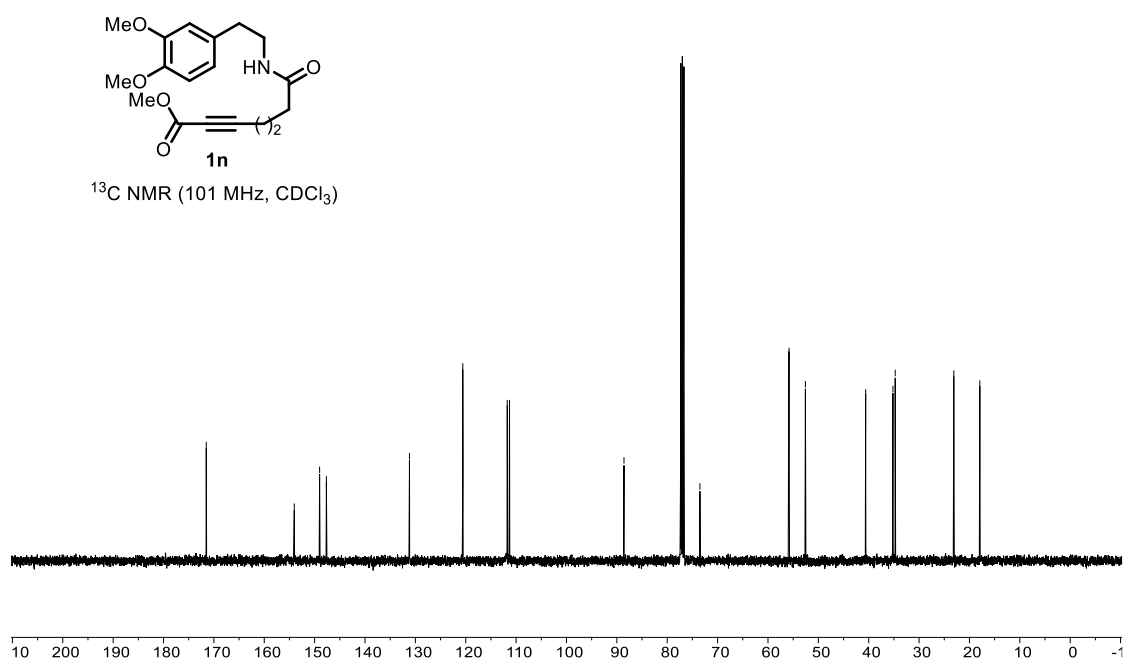

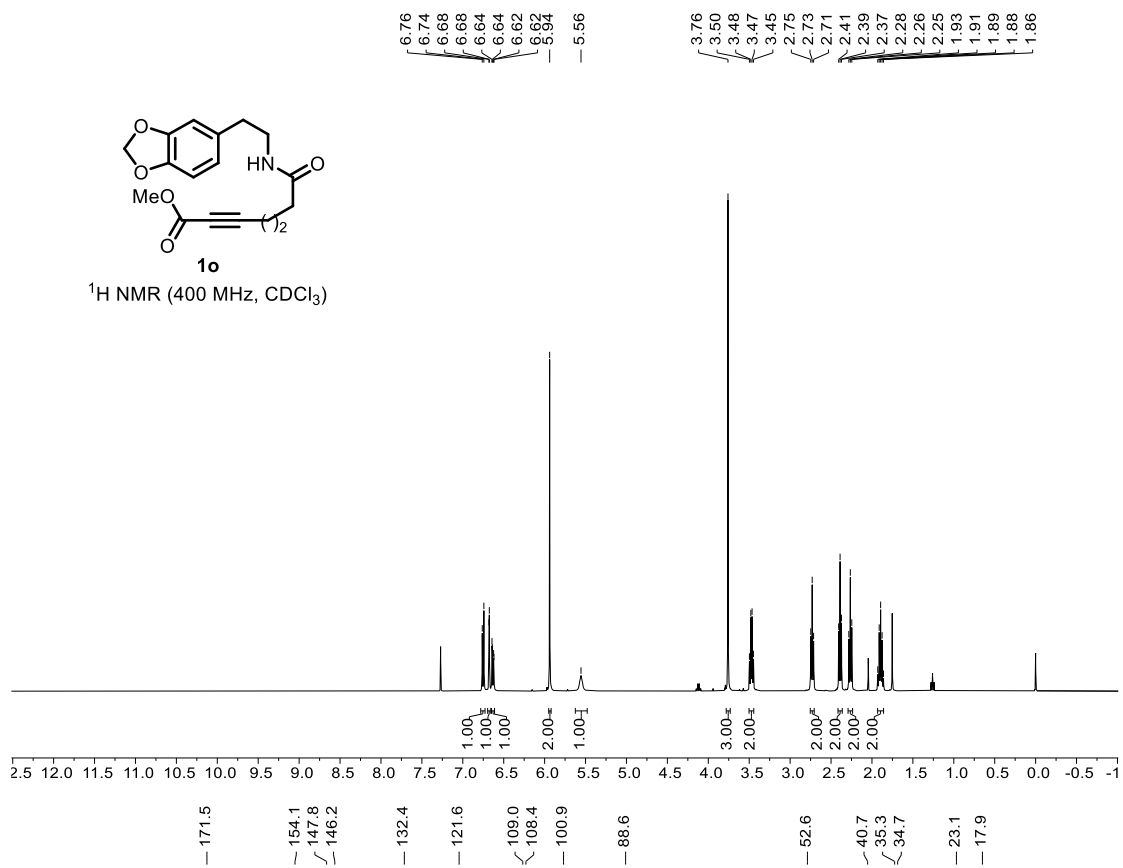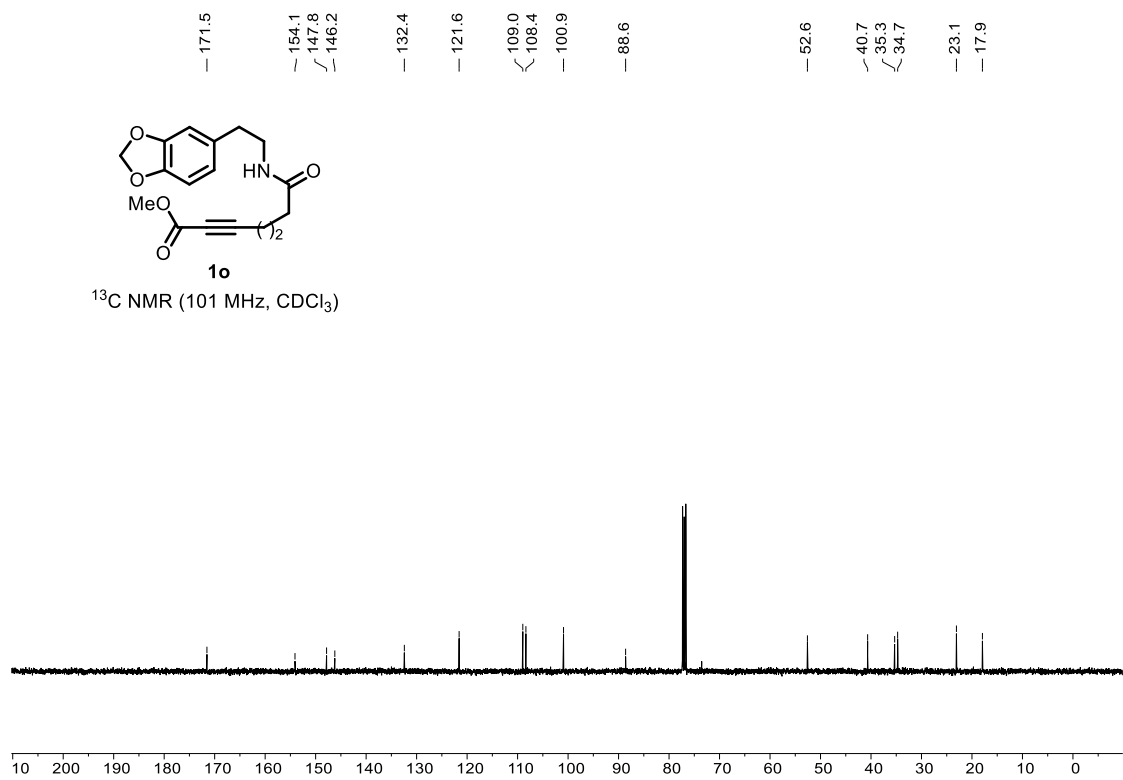



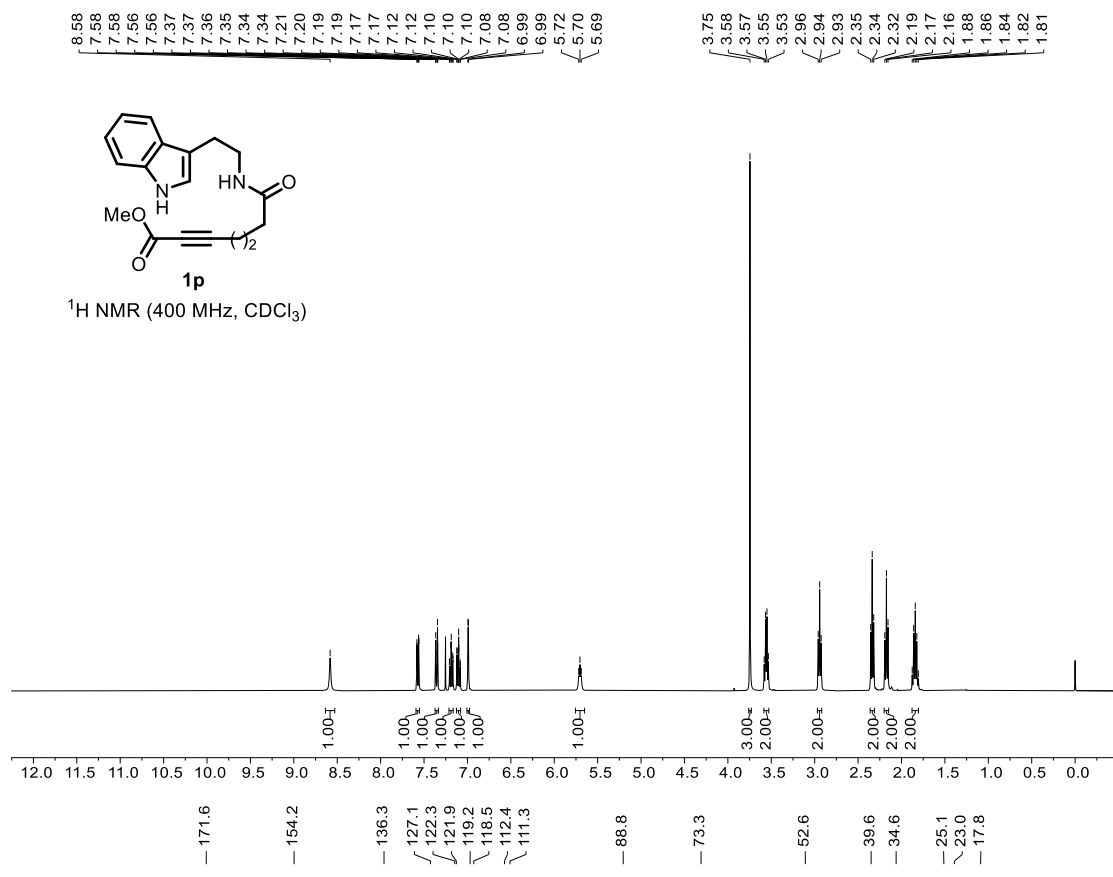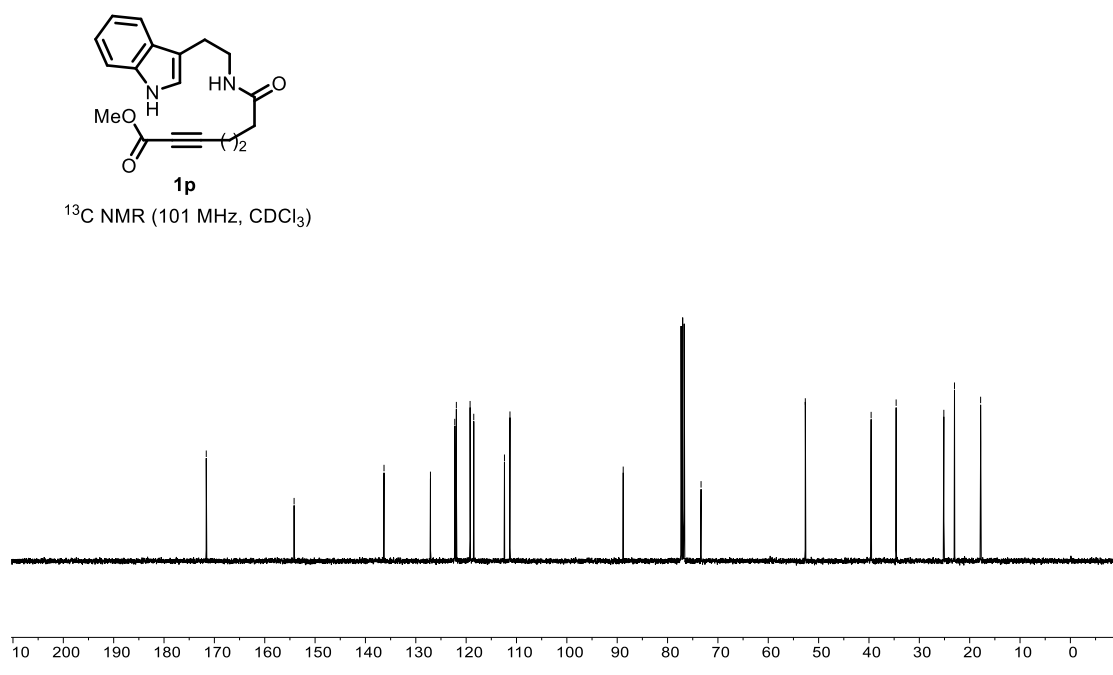

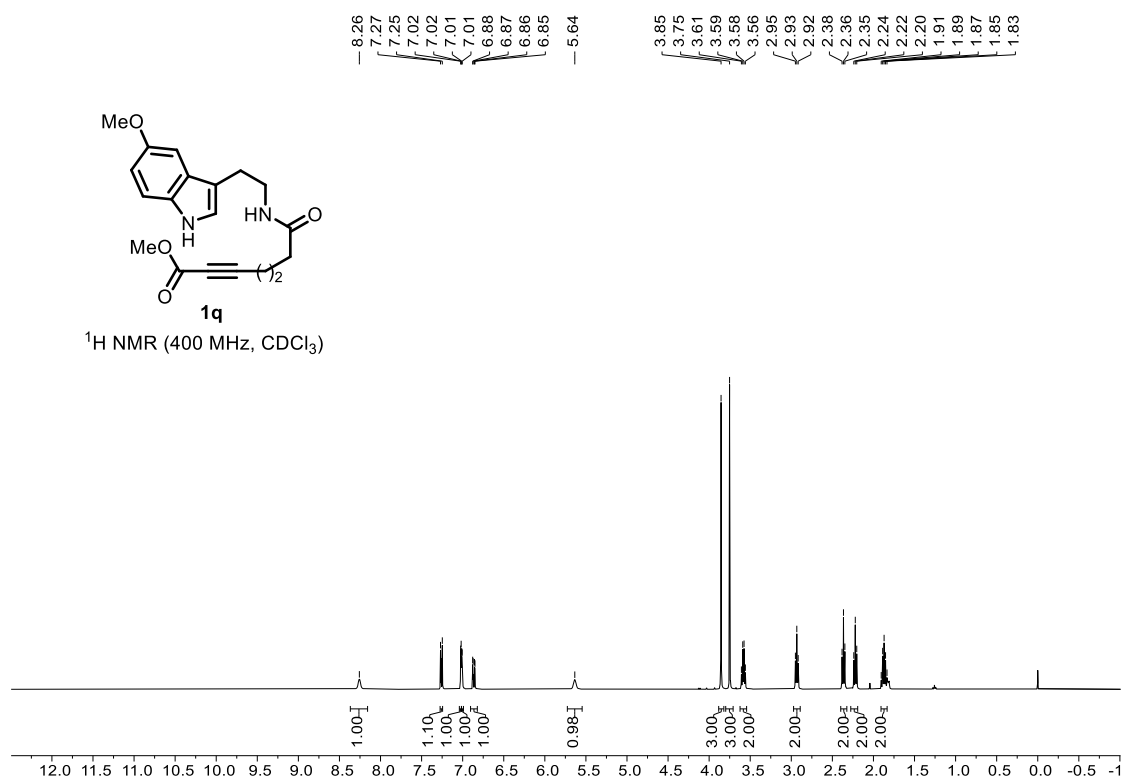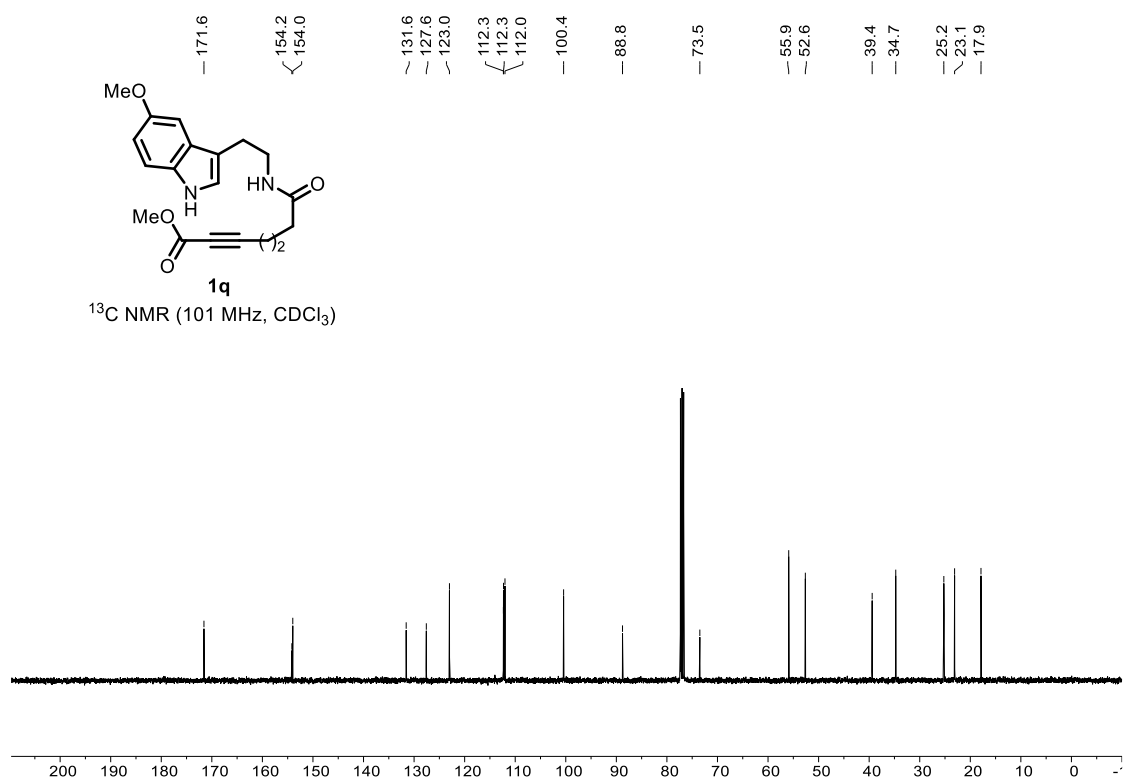

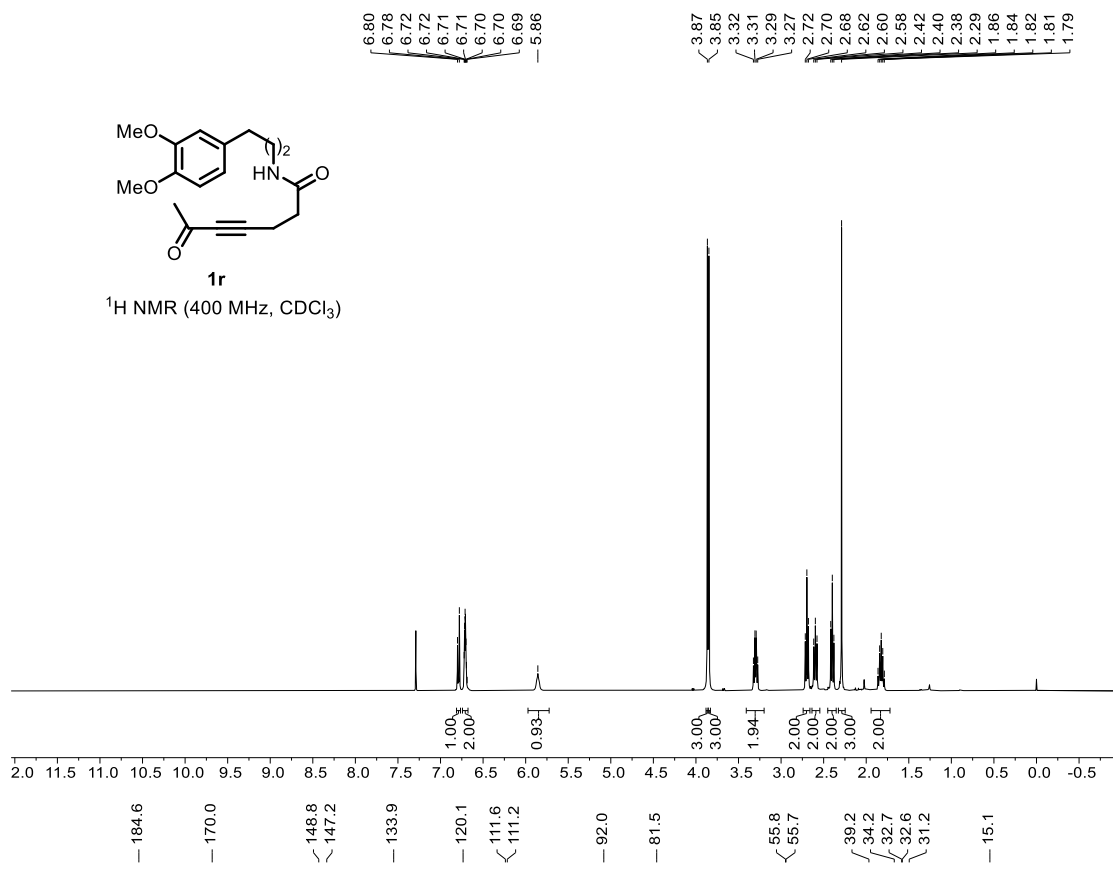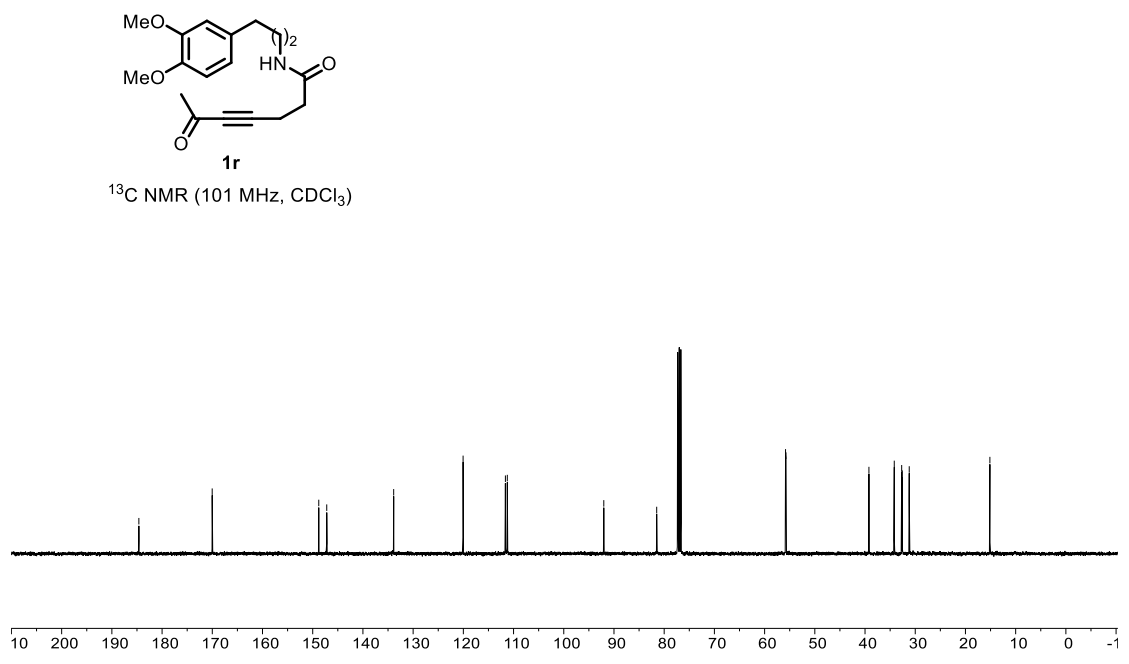

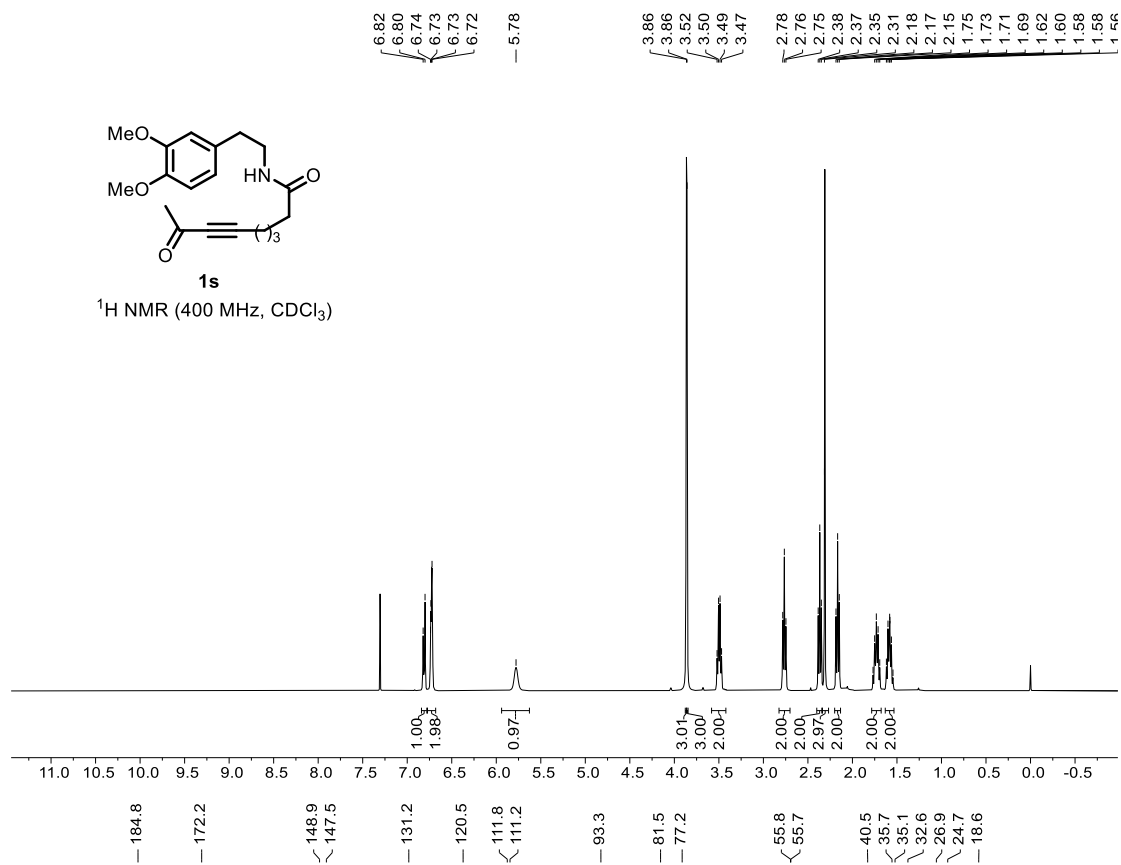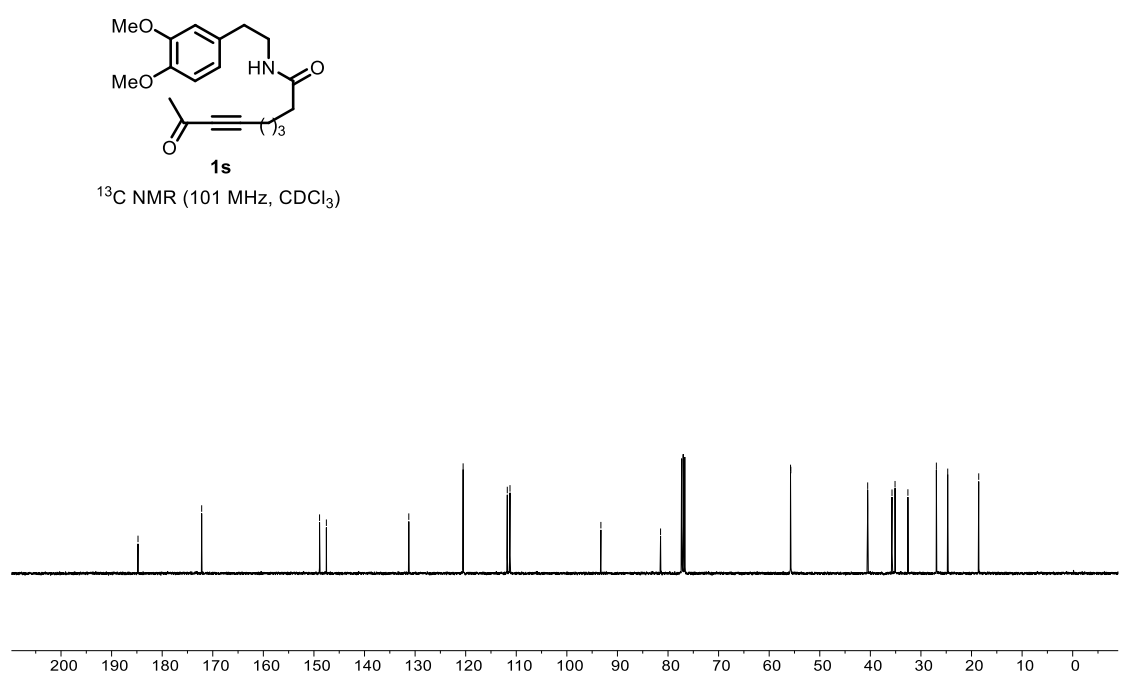

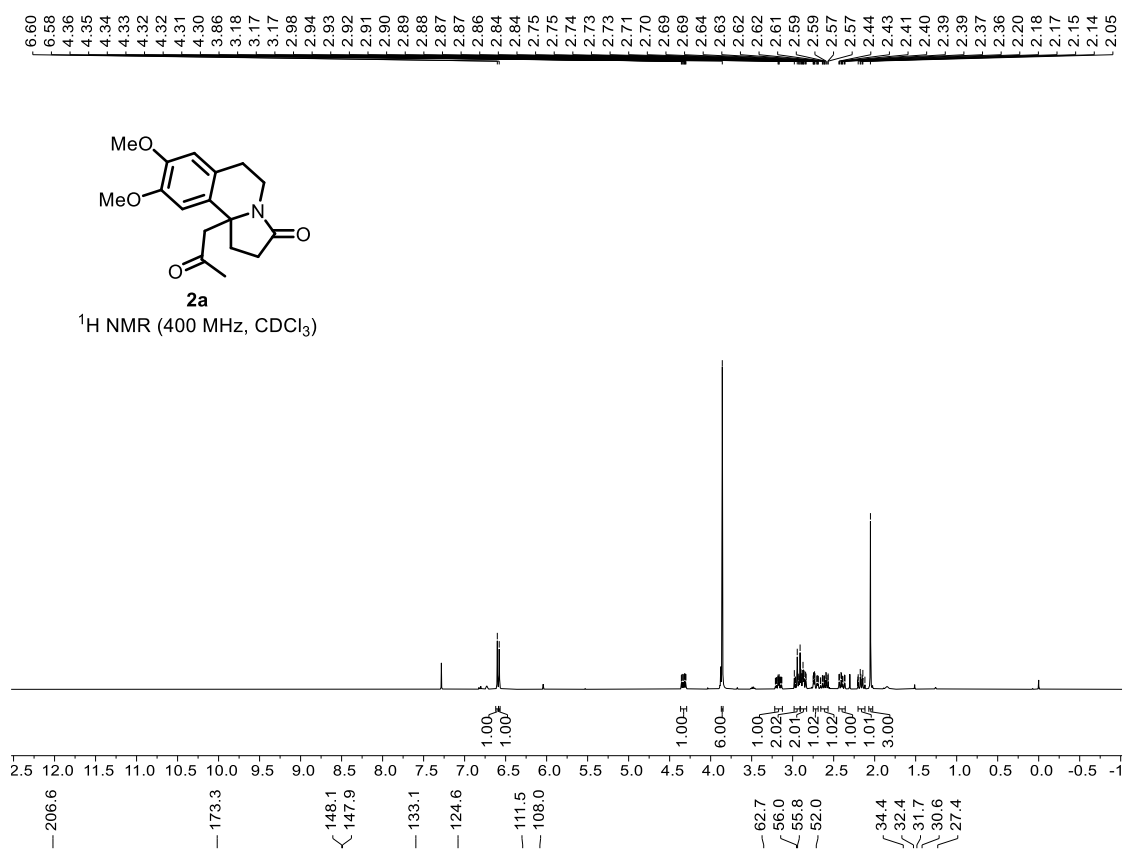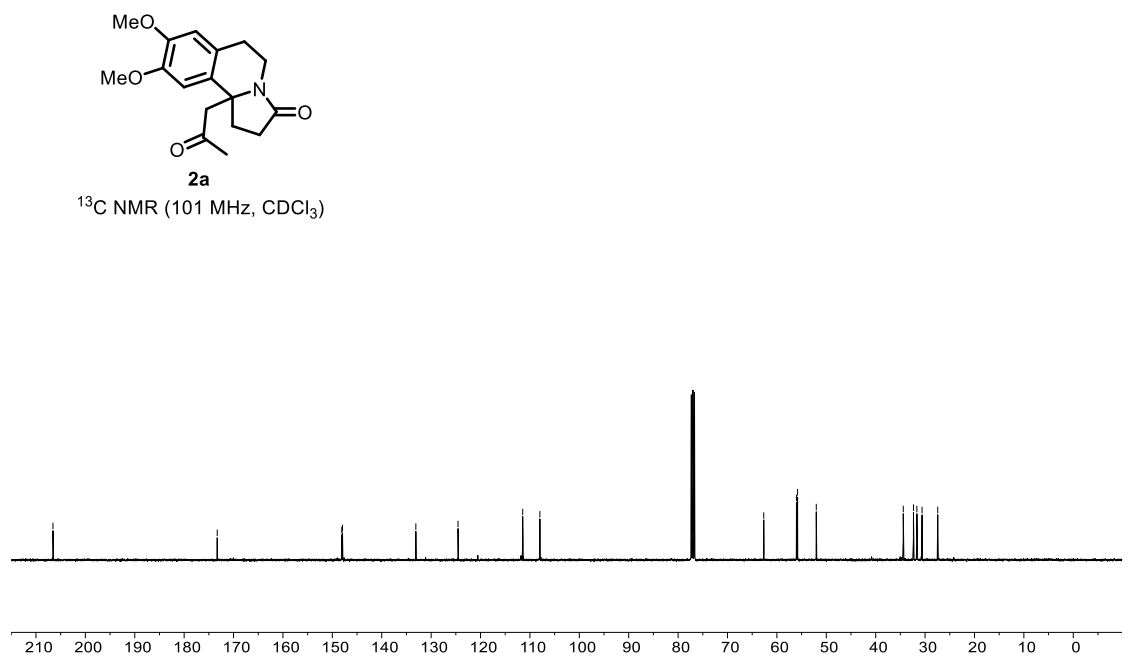

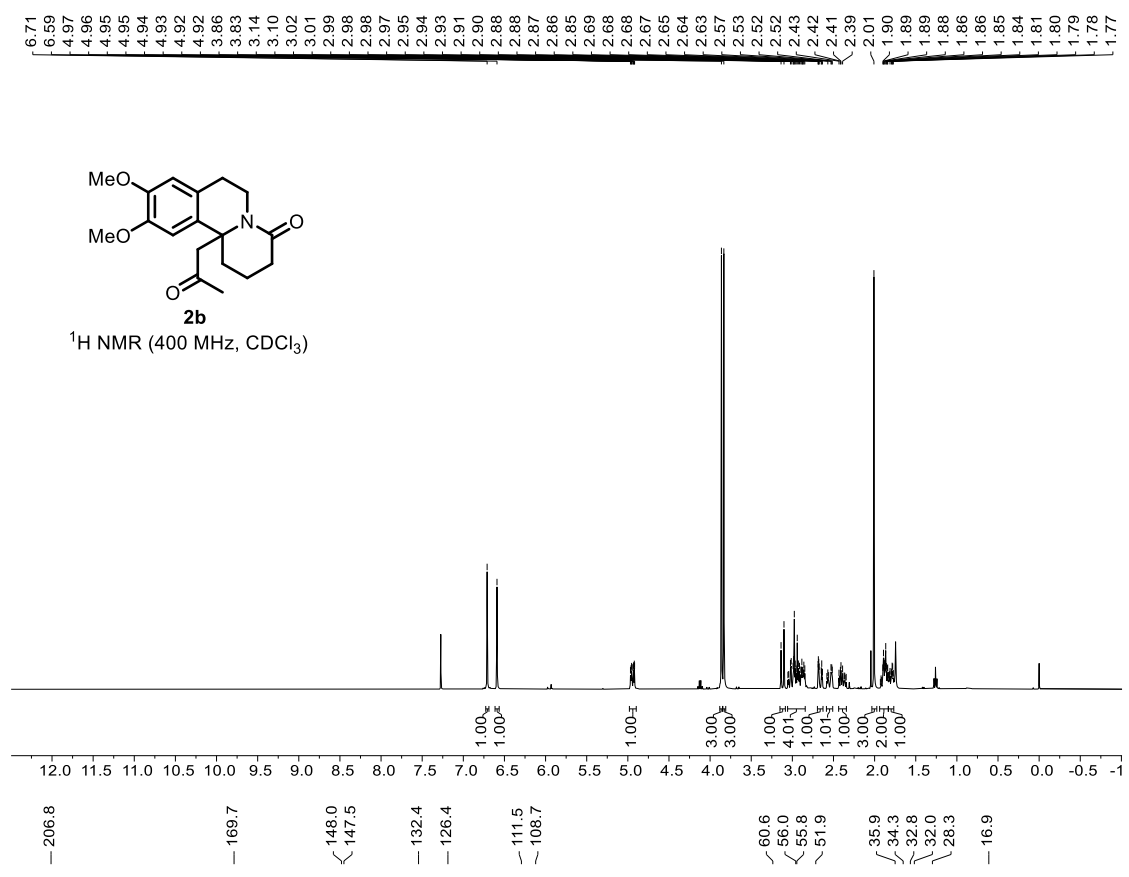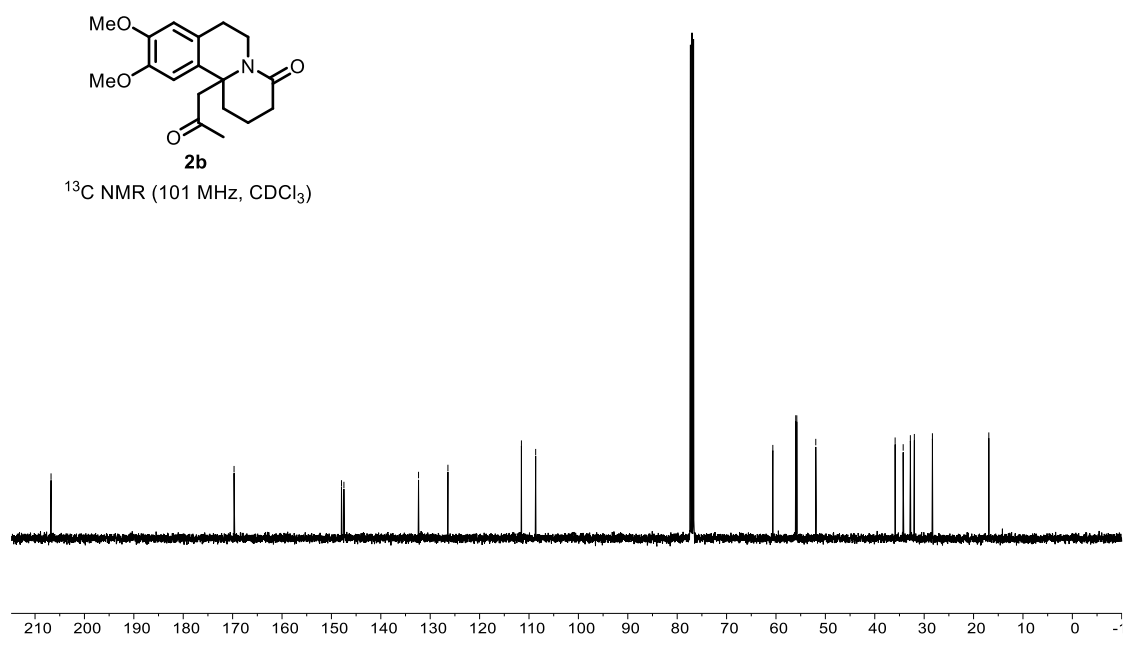

6.60  
6.56  
5.94  
5.93  
5.92  
4.31  
4.30  
4.29  
4.28  
4.27  
4.25  
4.25  
3.16  
3.15  
2.99  
2.96  
2.88  
2.87  
2.86  
2.84  
2.83  
2.81  
2.80  
2.79  
2.78  
2.77  
2.75  
2.75  
2.72  
2.72  
2.71  
2.71  
2.69  
2.68  
2.67  
2.63  
2.63  
2.62  
2.61  
2.59  
2.59  
2.42  
2.42  
2.41  
2.39  
2.39  
2.38  
2.37  
2.35  
2.34  
2.16  
2.14  
2.13  
2.11  
2.11  
2.08  
2.06

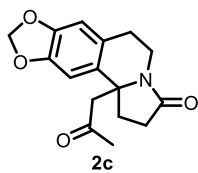

<sup>1</sup>H NMR (400 MHz, CDCl<sub>3</sub>)

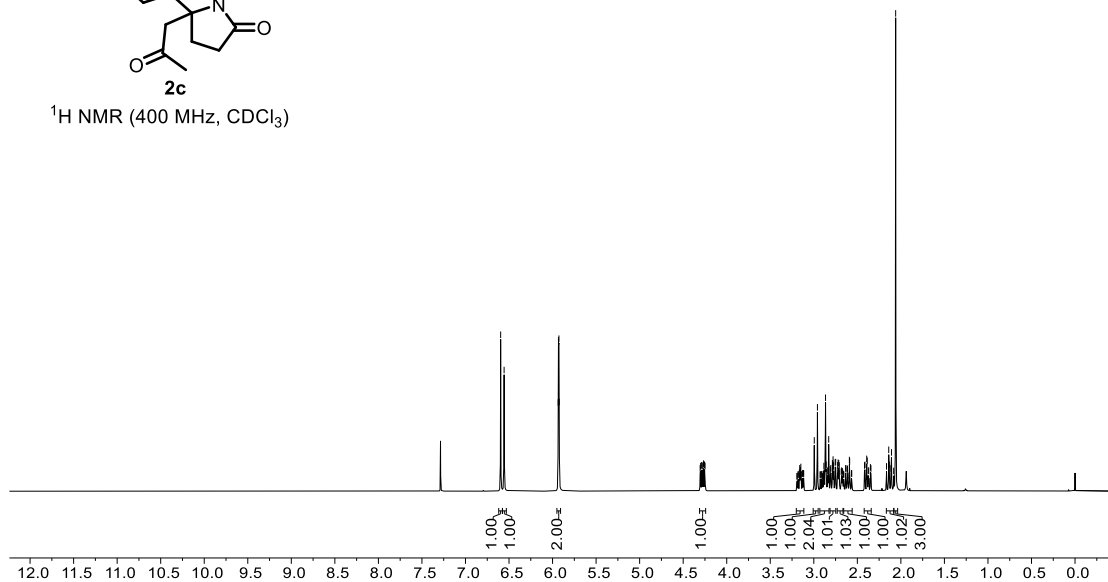

12.0  
11.5  
11.0  
10.5  
10.0  
9.5  
9.0  
8.5  
8.0  
7.5  
7.0  
6.5  
6.0  
5.5  
5.0  
4.5  
4.0  
3.5  
3.0  
2.5  
2.0  
1.5  
1.0  
0.5  
0.0

206.2  
173.3  
146.6  
146.6  
134.3  
125.7  
108.7  
105.0  
101.0  
62.8  
52.2  
34.4  
32.2  
32.1  
30.6  
27.9

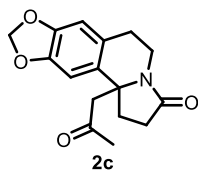

<sup>13</sup>C NMR (101 MHz, CDCl<sub>3</sub>)

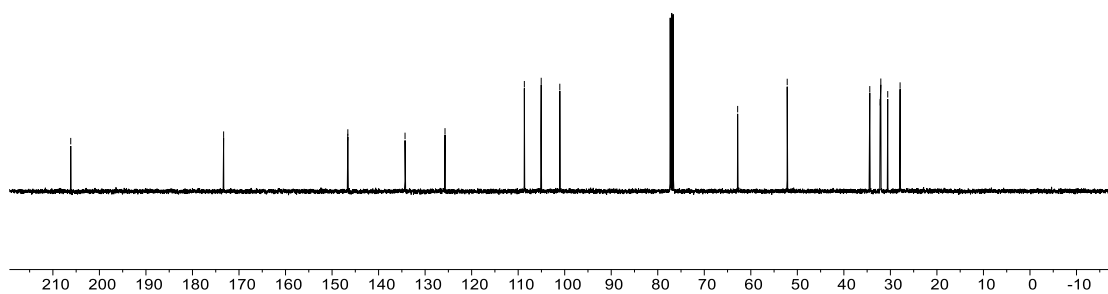

6.69  
6.57  
5.94  
5.93  
5.93  
5.92  
4.90  
4.89  
4.88  
4.88  
4.86  
4.86  
4.85  
4.84  
3.07  
3.04  
3.02  
3.01  
2.99  
2.98  
2.95  
2.93  
2.93  
2.90  
2.89  
2.88  
2.88  
2.75  
2.73  
2.73  
2.72  
2.72  
2.71  
2.70  
2.67  
2.67  
2.66  
2.66  
2.62  
2.62  
2.62  
2.53  
2.52  
2.51  
2.51  
2.43  
2.41  
2.39  
2.03  
1.89  
1.89  
1.87  
1.86  
1.86  
1.86  
1.84  
1.84  
1.77  
1.76  
1.74  
1.73  
1.72

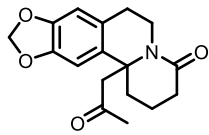

**2d**

<sup>1</sup>H NMR (400 MHz, CDCl<sub>3</sub>)

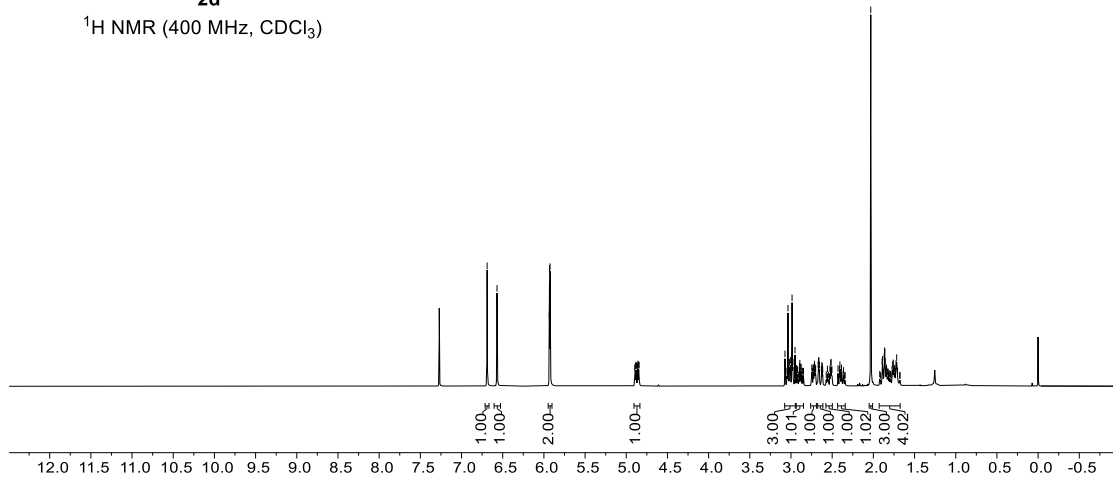

— 206.3  
— 169.8  
— 146.5  
— 146.5  
— 133.6  
— 127.7  
— 108.8  
— 105.4  
— 101.1  
— 60.9  
— 52.3  
— 36.1  
— 34.7  
— 32.6  
— 31.9  
— 28.8  
— 16.9

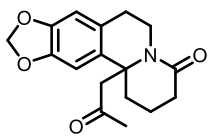

**2d**

<sup>13</sup>C NMR (101 MHz, CDCl<sub>3</sub>)

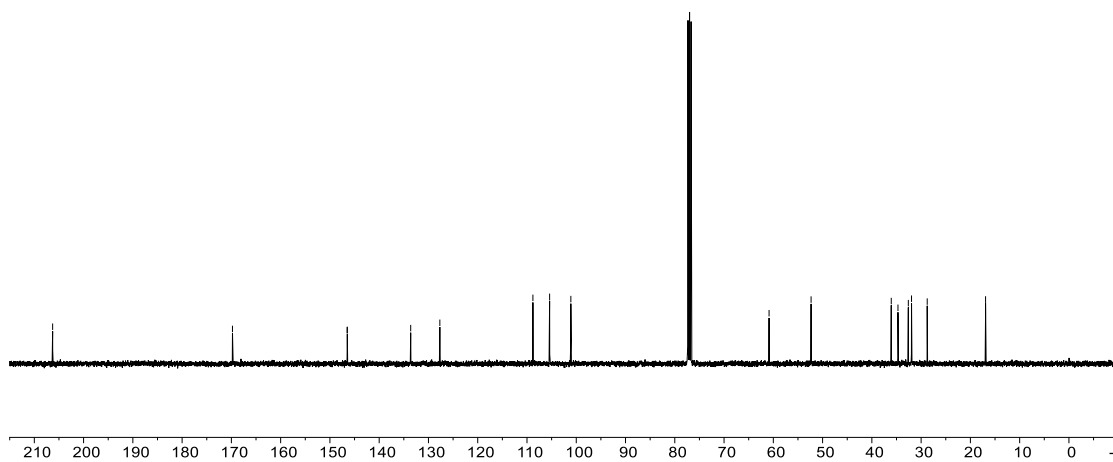



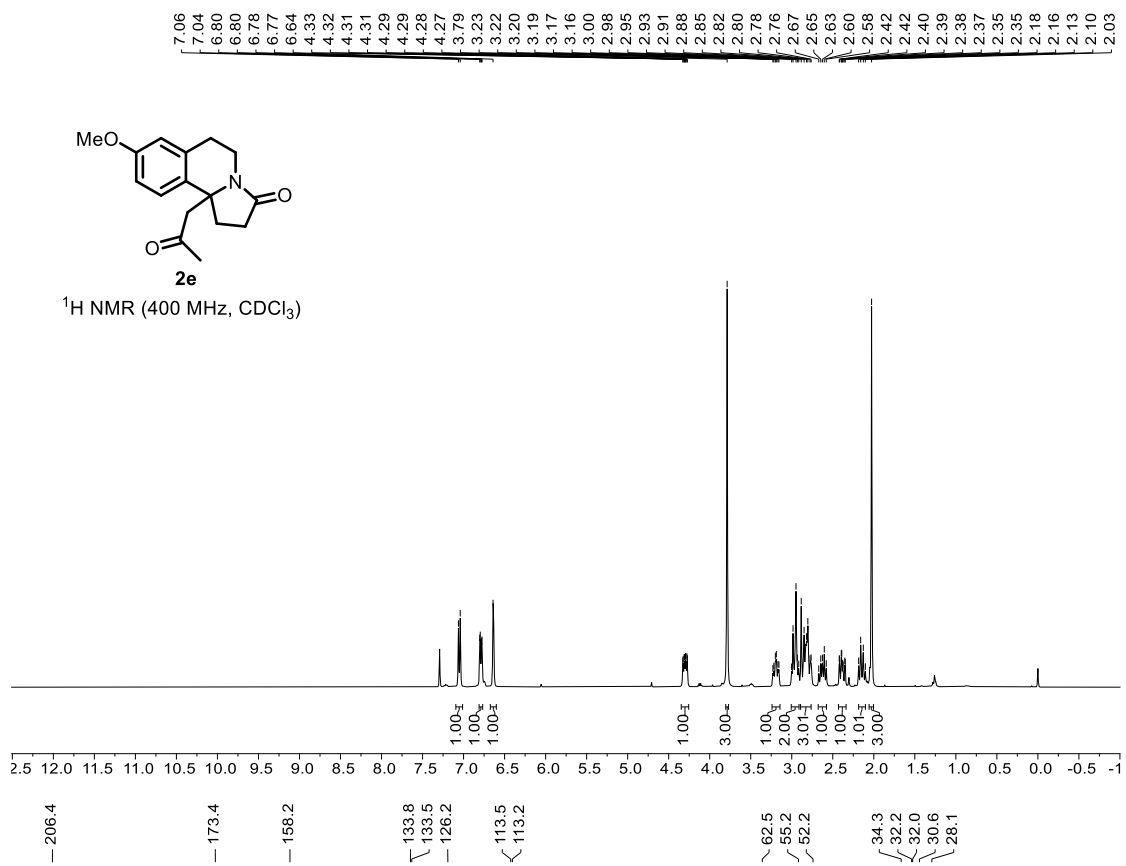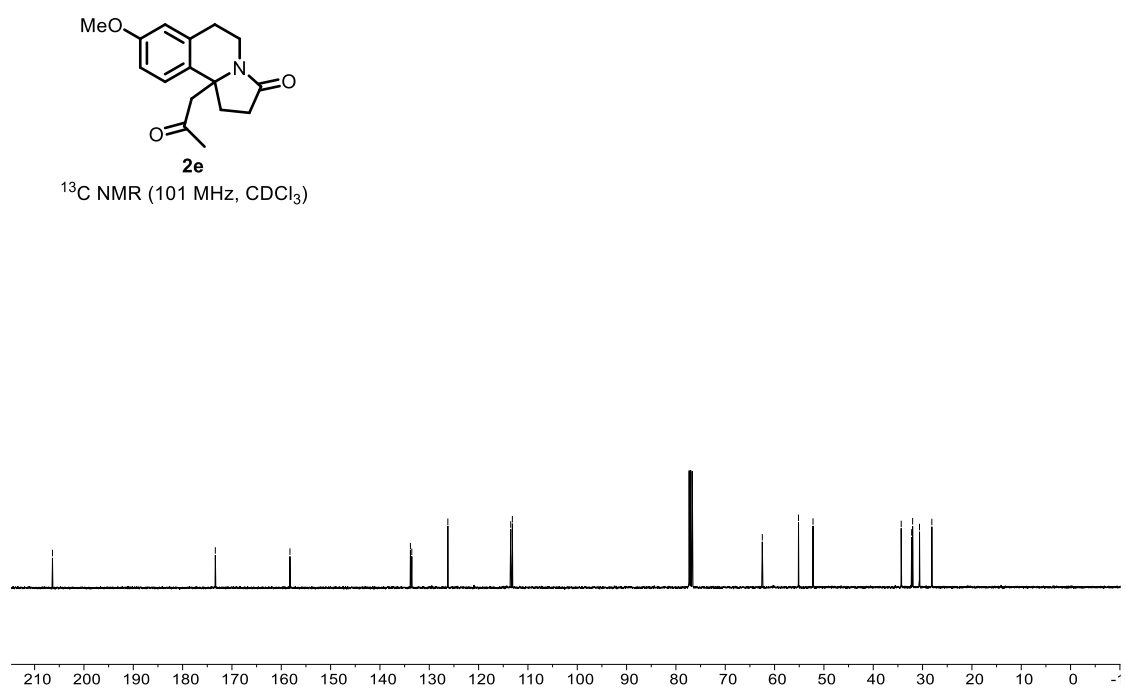

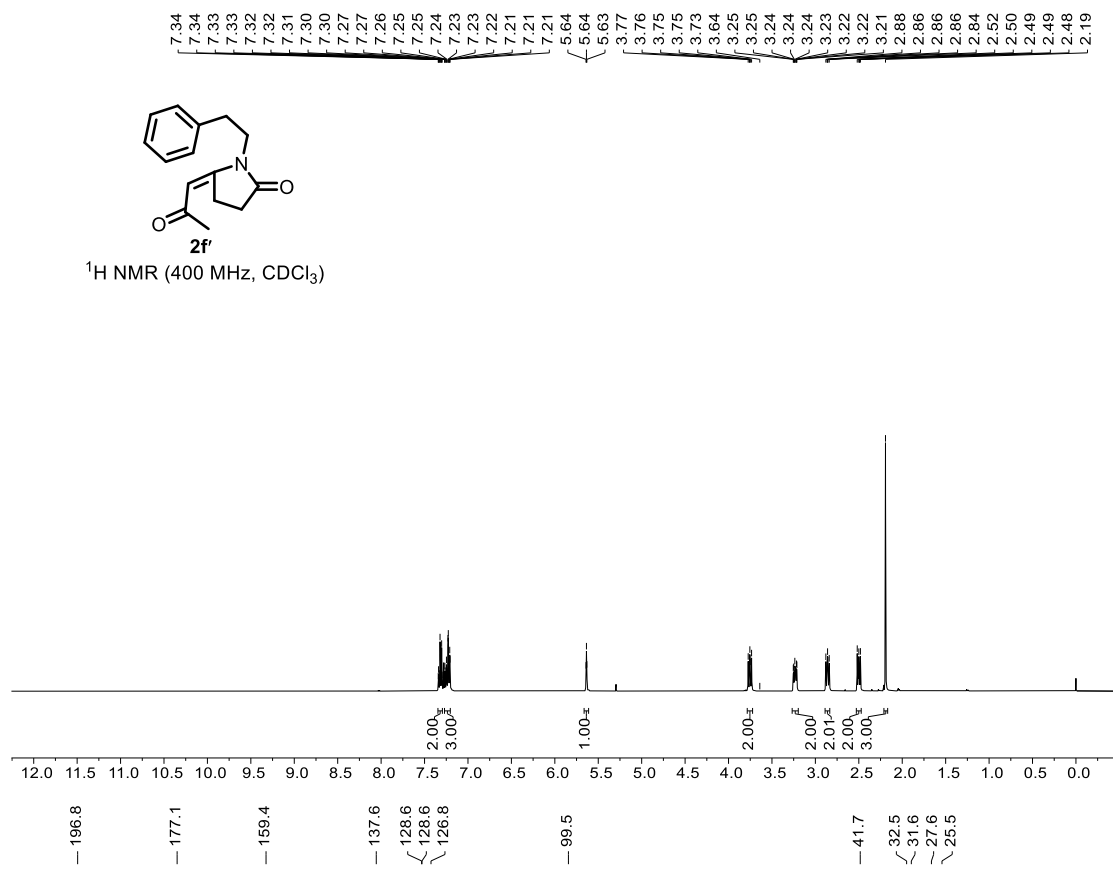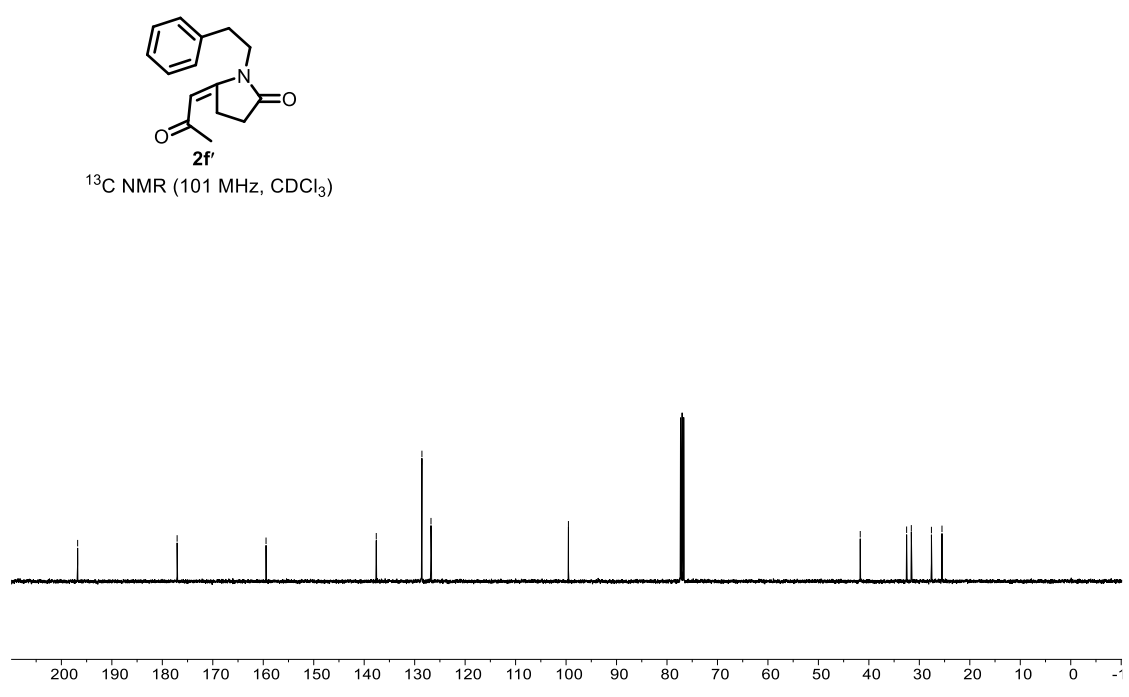

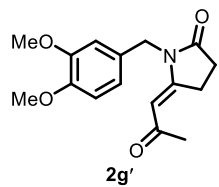

<sup>1</sup>H NMR (400 MHz, CDCl<sub>3</sub>)

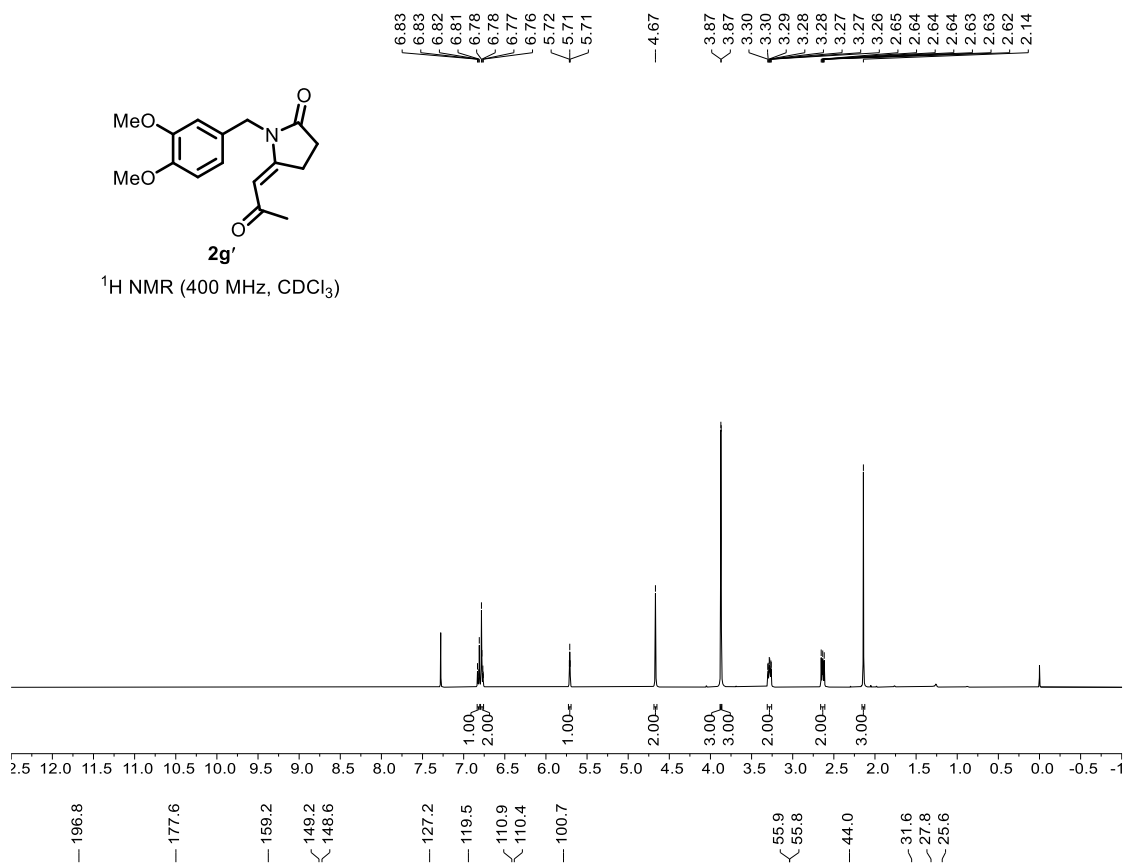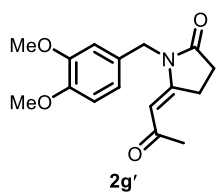

<sup>13</sup>C NMR (101 MHz, CDCl<sub>3</sub>)

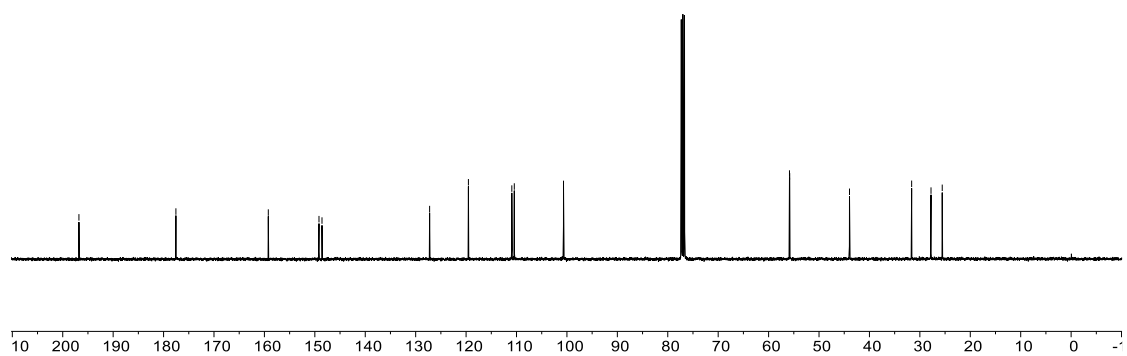

7.54  
7.54  
7.53  
7.53  
7.52  
7.29  
7.27  
7.26  
7.25  
7.25  
7.24  
7.24  
7.23  
7.23  
7.15  
7.15  
7.15  
7.14  
7.14  
7.14  
7.13  
7.13  
7.13  
7.08  
7.07  
7.07  
7.06  
7.06  
6.88  
6.88  
6.86  
6.86  
5.41  
5.40  
4.57  
4.55  
3.15  
3.11  
2.95  
2.94  
2.92  
2.91  
2.90  
2.90  
2.89  
2.89  
2.73  
2.72  
2.71  
2.70  
2.68  
2.63  
2.40  
2.38  
2.37  
2.34  
2.25  
2.23  
2.02

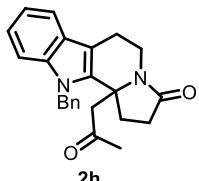

<sup>1</sup>H NMR (400 MHz, CDCl<sub>3</sub>)

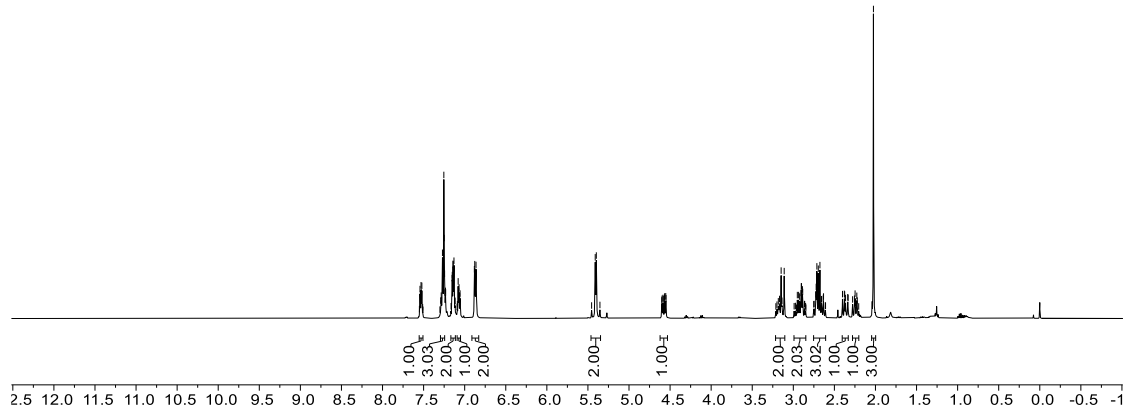

205.6  
173.2  
137.6  
137.1  
136.9  
128.9  
127.5  
126.3  
125.5  
122.6  
120.0  
118.7  
110.1  
107.7  
61.5  
50.2  
47.7  
34.8  
32.1  
30.8  
29.6  
21.0

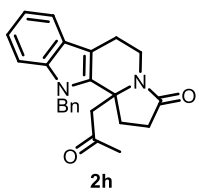

<sup>13</sup>C NMR (101 MHz, CDCl<sub>3</sub>)

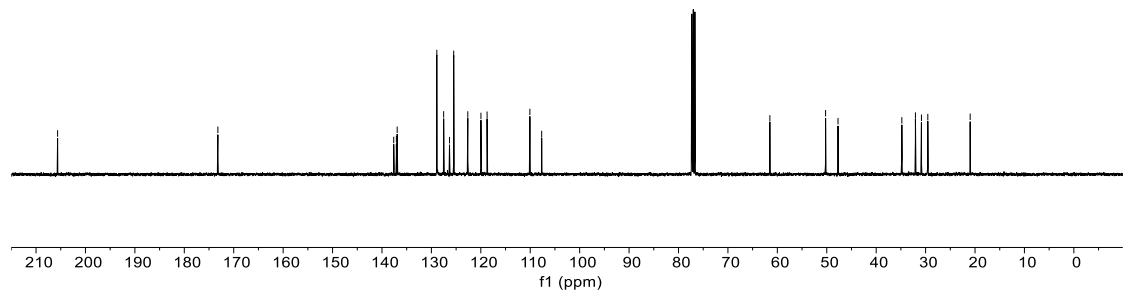



7.29  
7.28  
7.27  
7.27  
7.25  
7.25  
7.24  
7.24  
7.23  
6.96  
6.96  
6.94  
6.87  
6.87  
6.85  
6.85  
6.81  
6.80  
6.78  
6.78  
5.37  
5.36  
4.60  
4.59  
4.58  
4.57  
4.57  
4.55  
4.55  
3.85  
3.17  
3.15  
3.11  
2.91  
2.90  
2.86  
2.86  
2.85  
2.84  
2.72  
2.71  
2.71  
2.69  
2.67  
2.64  
2.63  
2.63  
2.41  
2.41  
2.40  
2.39  
2.38  
2.37  
2.26  
2.25  
2.23  
2.03

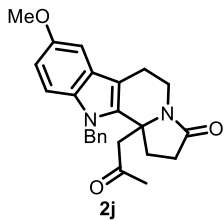

<sup>1</sup>H NMR (400 MHz, CDCl<sub>3</sub>)

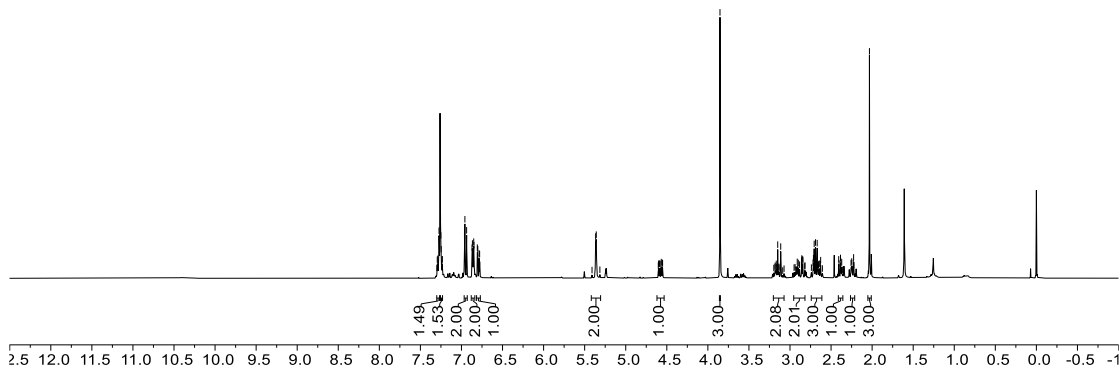

205.7  
173.3  
154.5  
138.2  
137.1  
132.2  
128.9  
127.6  
126.7  
125.5  
112.6  
111.0  
107.3  
100.6  
61.6  
55.9  
50.3  
47.9  
34.9  
32.1  
30.9  
29.6  
21.1

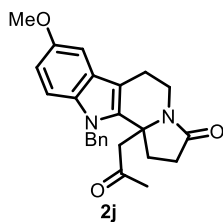

<sup>13</sup>C NMR (101 MHz, CDCl<sub>3</sub>)

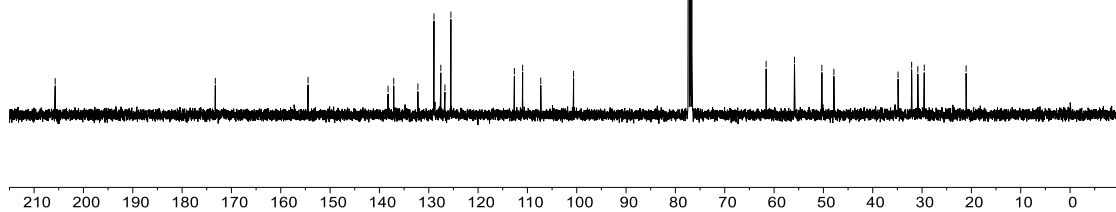

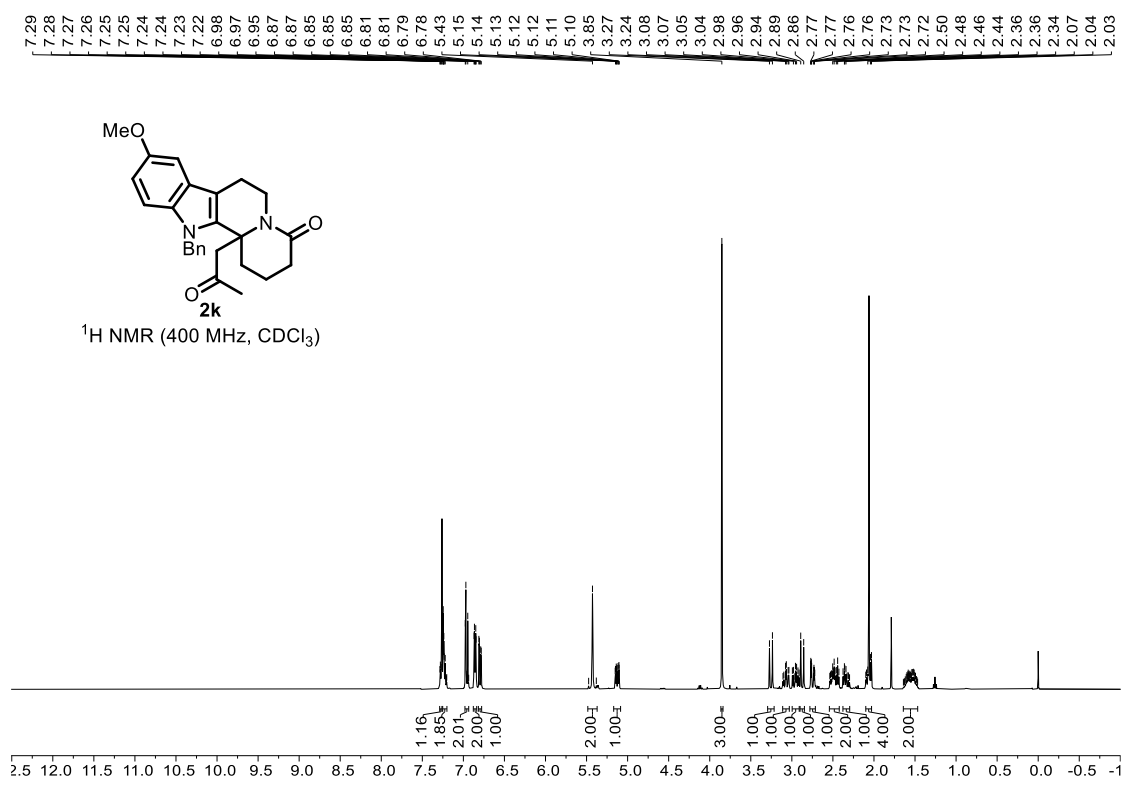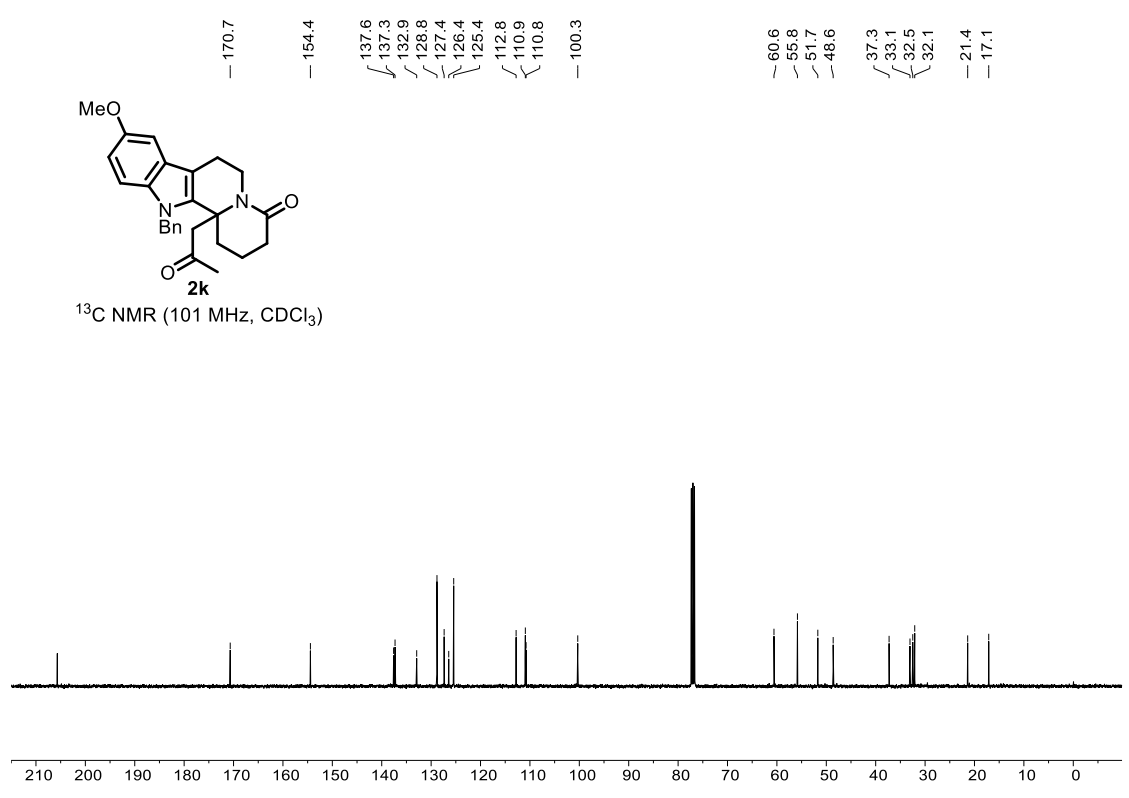

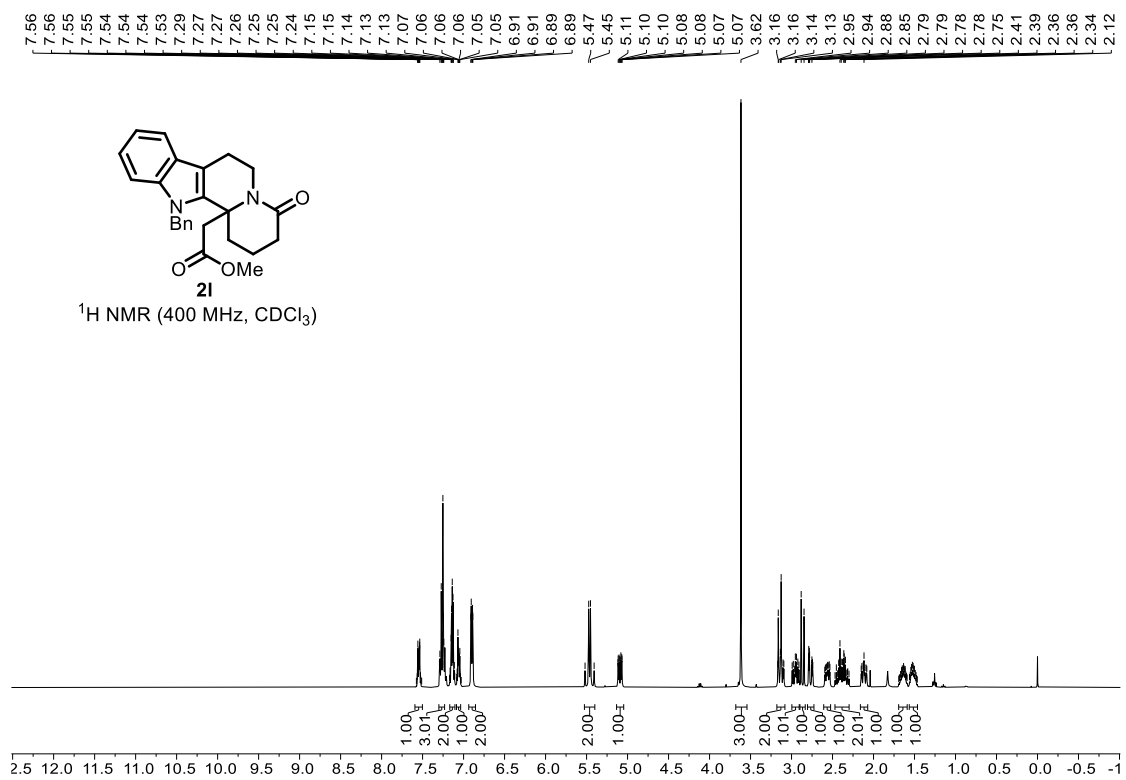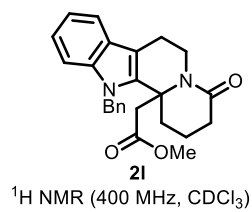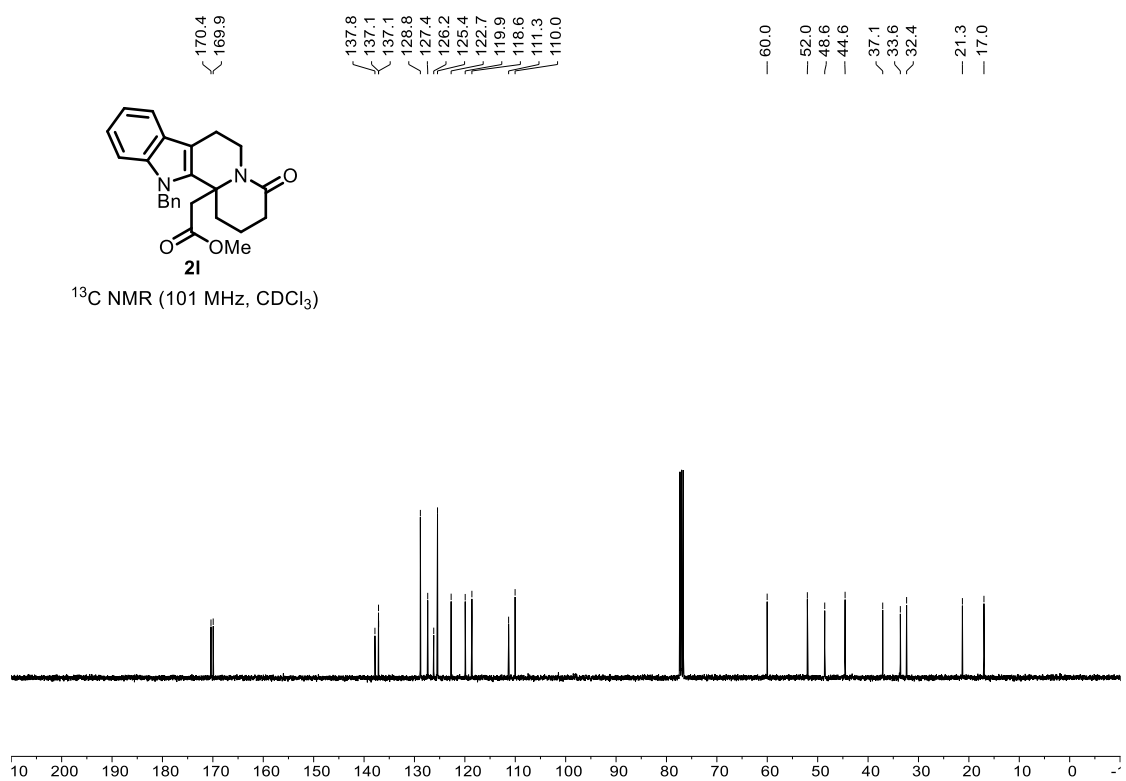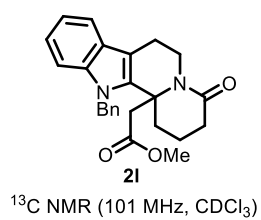



7.30  
7.29  
7.27  
7.27  
7.25  
7.25  
7.24  
7.24  
7.23  
6.98  
6.97  
6.95  
6.93  
6.90  
6.90  
6.88  
6.88  
6.81  
6.80  
6.78  
6.78  
5.43  
5.42  
5.11  
5.11  
5.10  
5.10  
5.08  
5.08  
5.07  
5.06  
3.85  
3.62  
3.16  
3.16  
3.13  
3.12  
3.10  
2.93  
2.91  
2.89  
2.88  
2.87  
2.83  
2.75  
2.74  
2.74  
2.73  
2.71  
2.70  
2.53  
2.43  
2.41  
2.39  
2.38  
2.37  
2.36  
2.35  
2.11

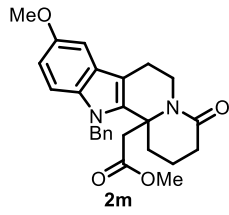

$^1\text{H NMR}$  (400 MHz,  $\text{CDCl}_3$ )

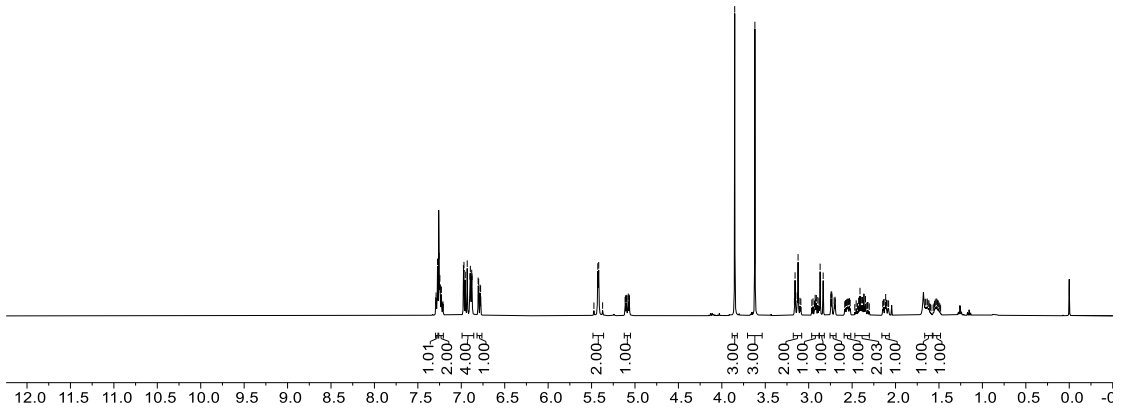

170.4  
170.0  
154.4  
137.7  
137.3  
133.0  
128.9  
127.4  
126.5  
125.4  
112.8  
110.9  
110.9  
100.4  
60.1  
55.9  
52.1  
48.7  
44.6  
37.1  
33.6  
32.4  
21.4  
17.0

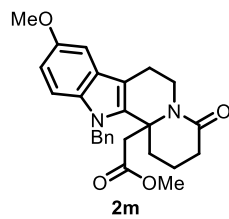

$^{13}\text{C NMR}$  (101 MHz,  $\text{CDCl}_3$ )

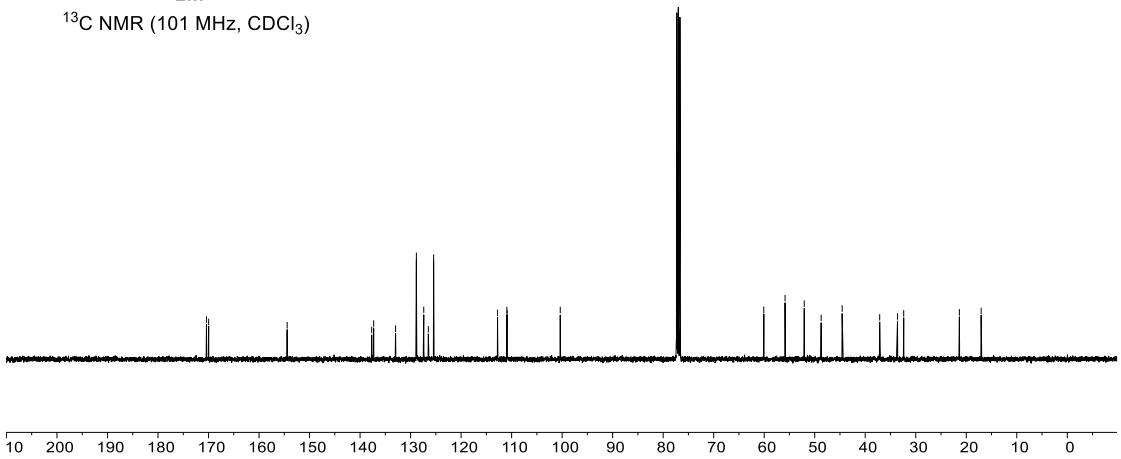

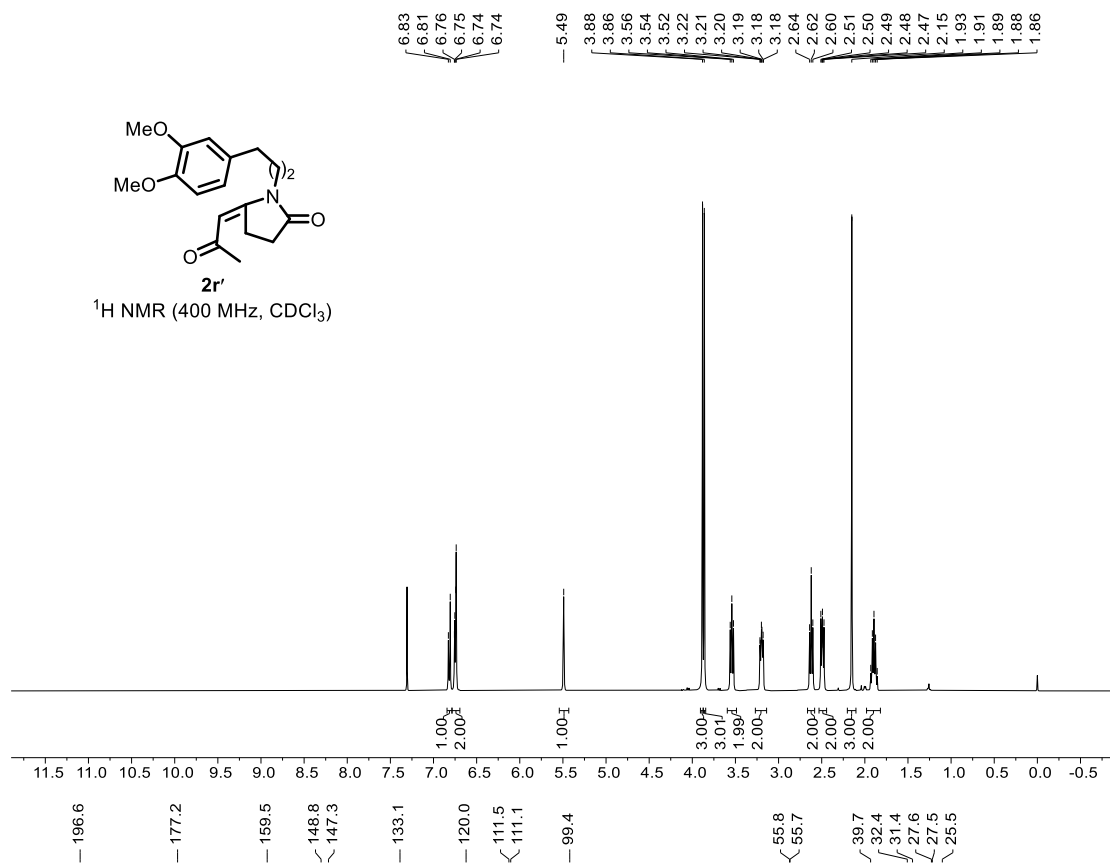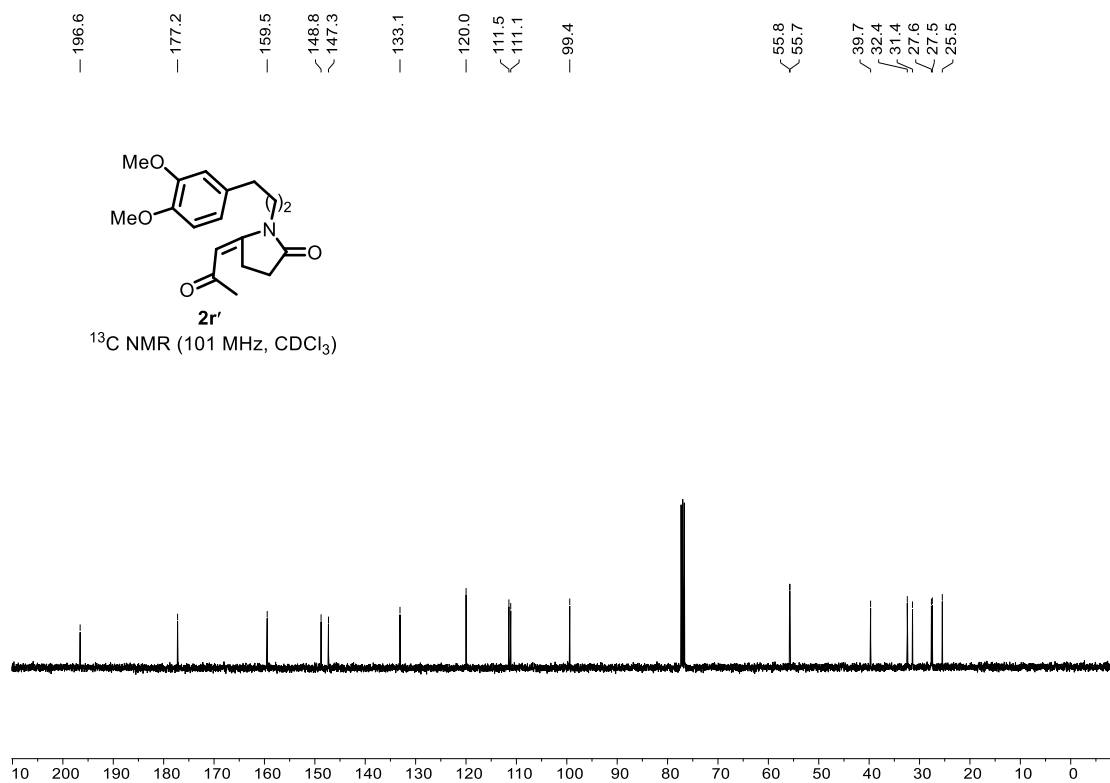

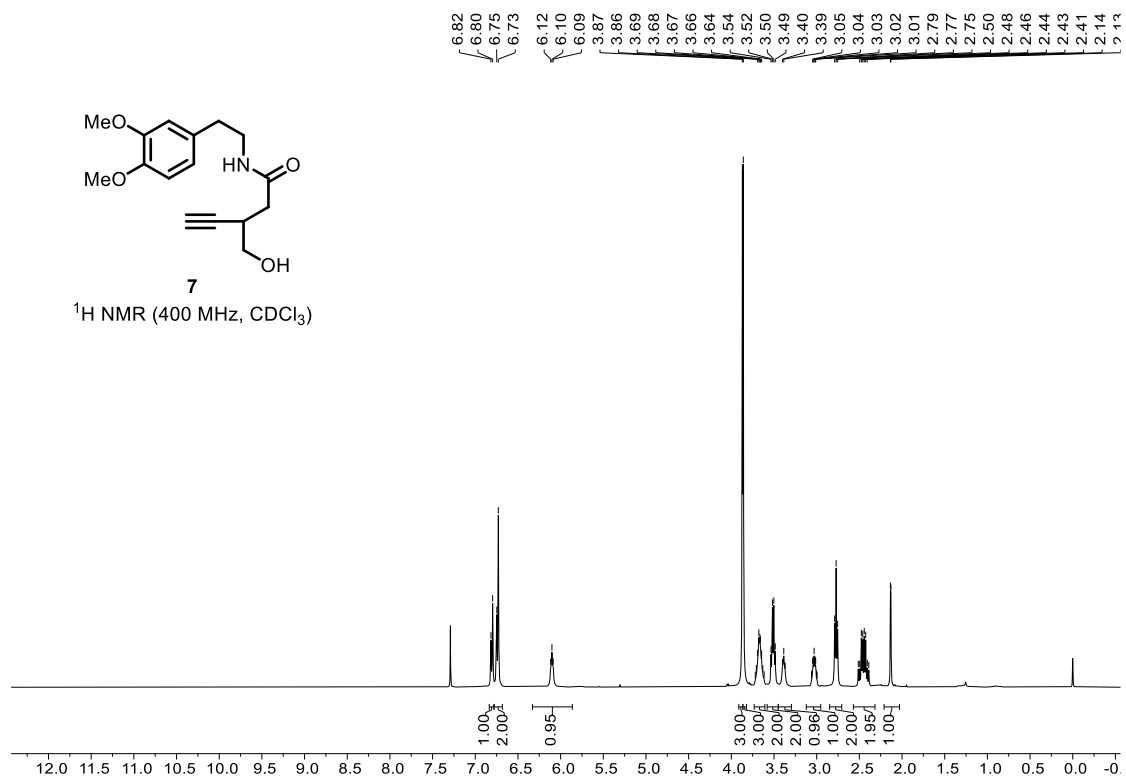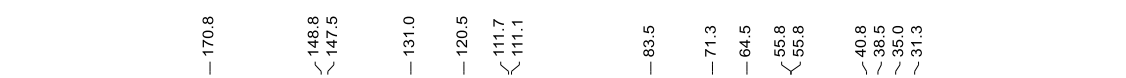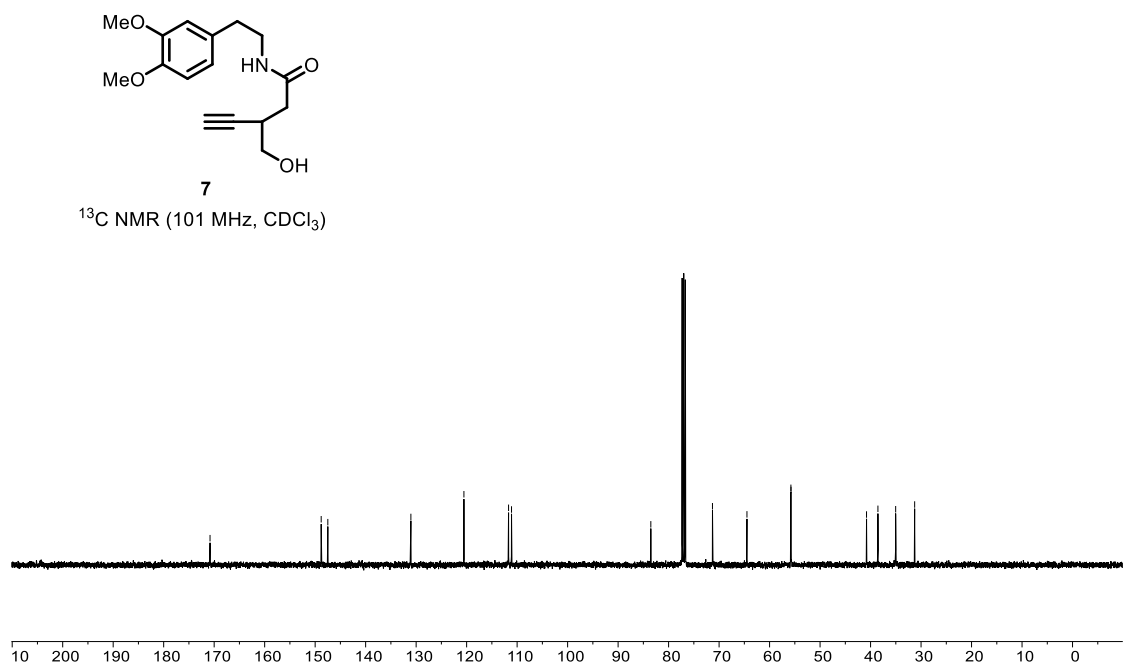

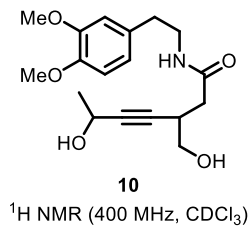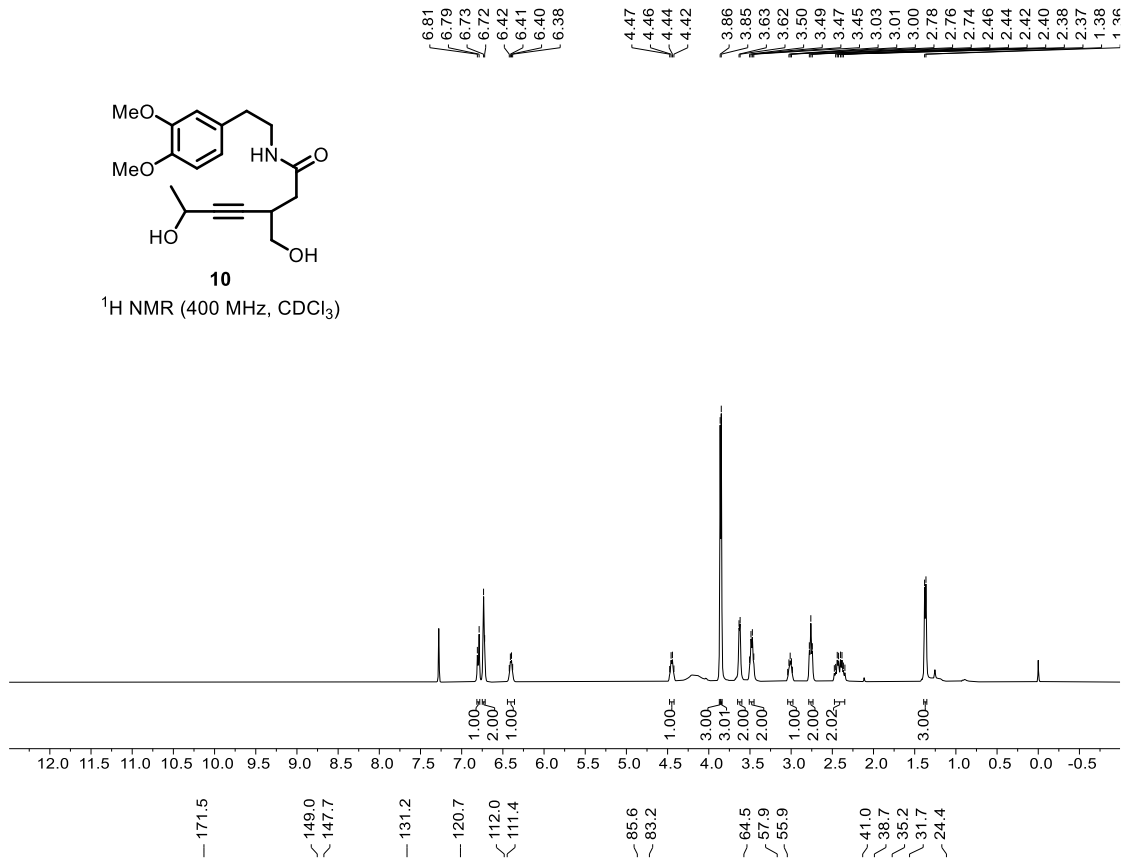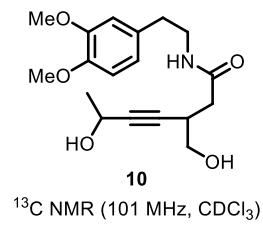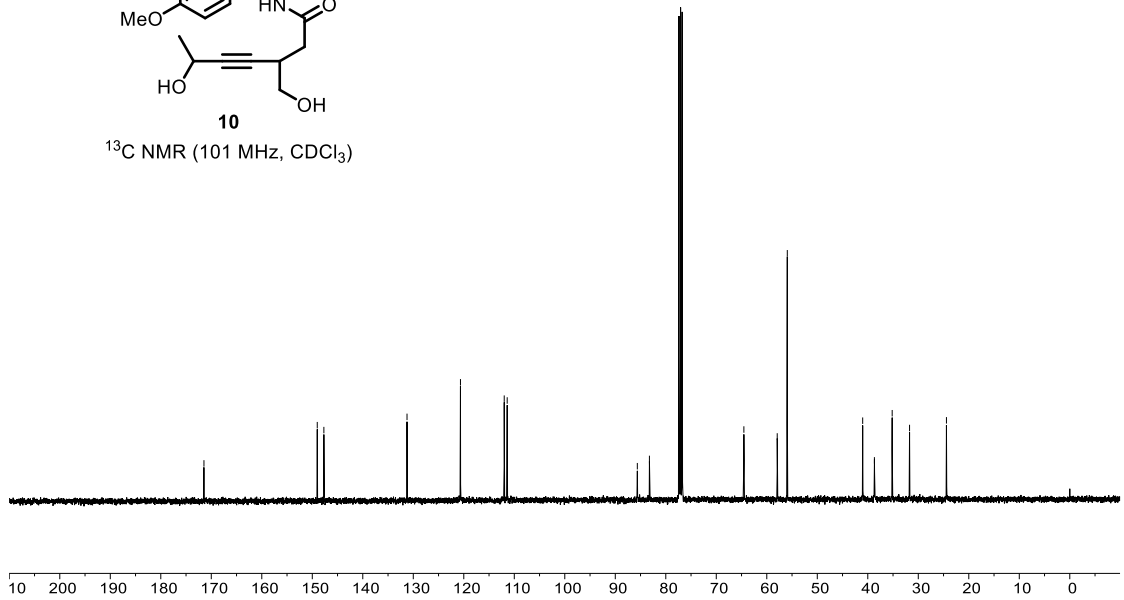

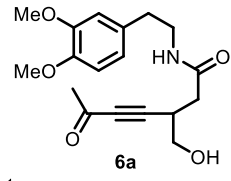

<sup>1</sup>H NMR (400 MHz, CDCl<sub>3</sub>)

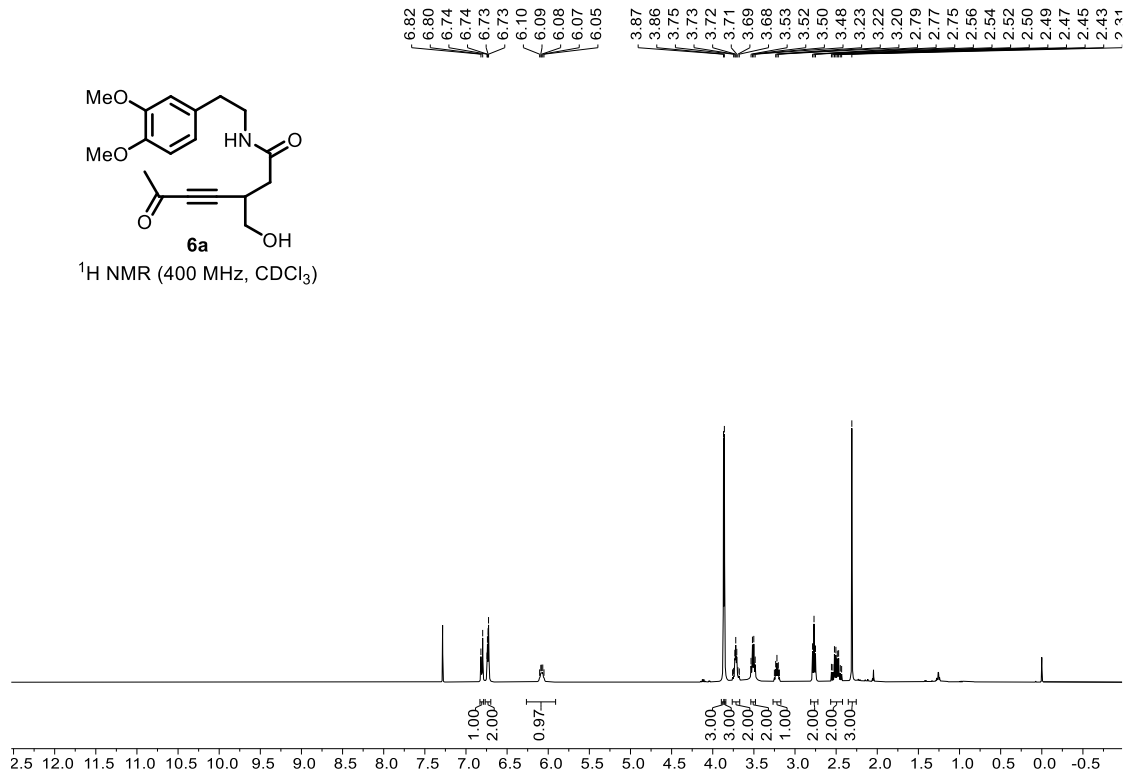

Chemical shift values (ppm): 184.7, 170.2, 149.0, 147.6, 131.0, 120.6, 111.8, 111.3, 92.3, 82.8, 63.8, 55.8, 55.8, 40.9, 37.7, 35.1, 32.7, 31.6.

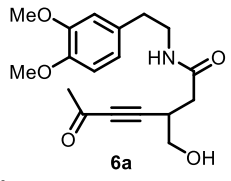

<sup>13</sup>C NMR (101 MHz, CDCl<sub>3</sub>)

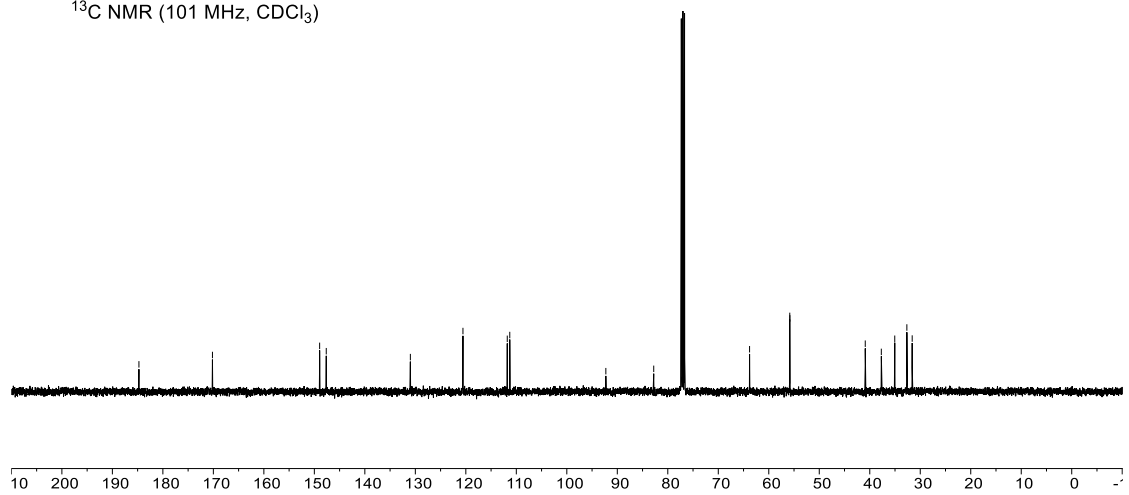

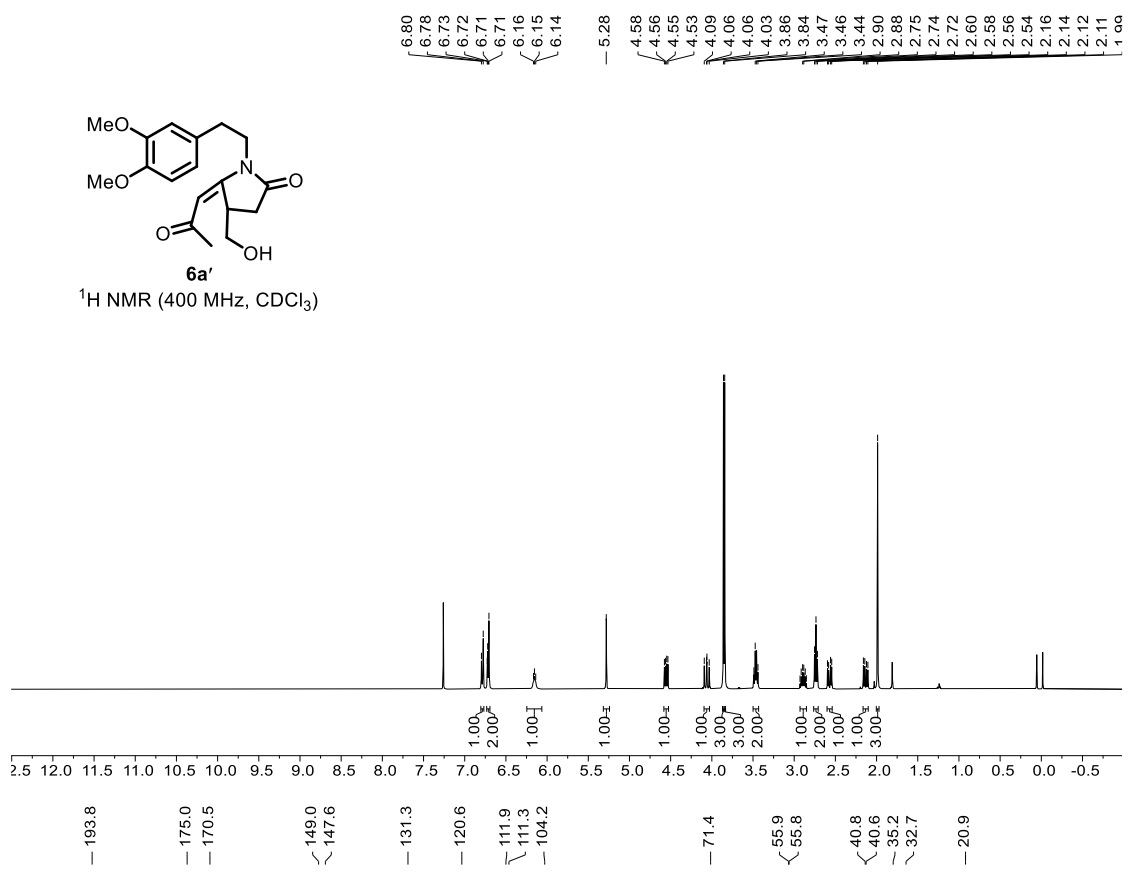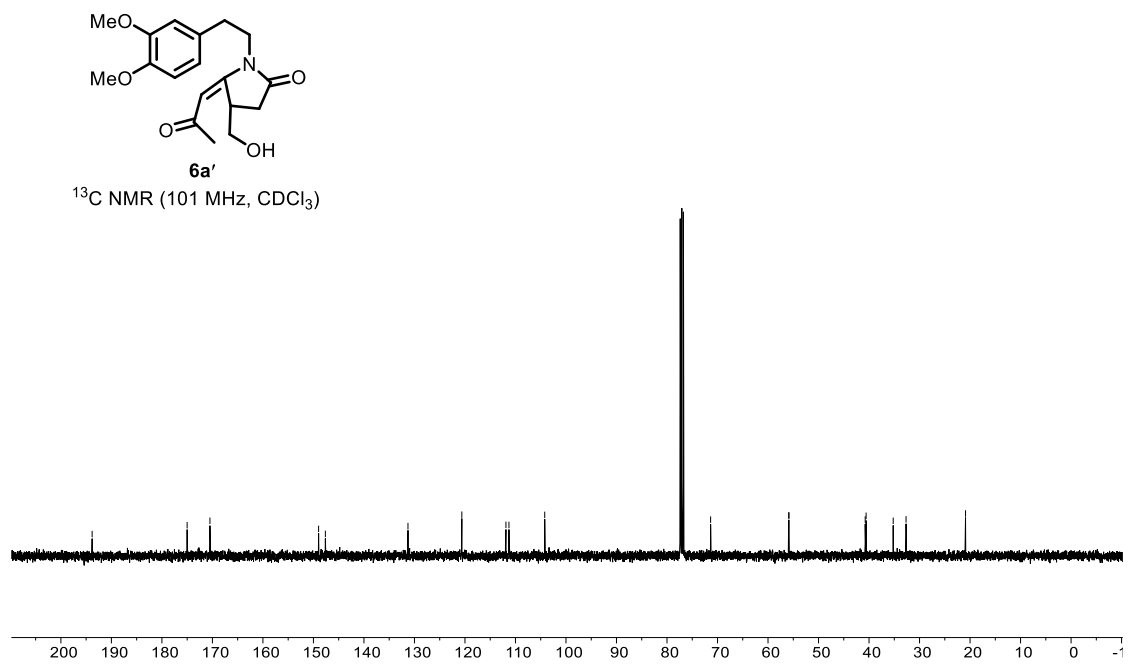

7.36  
7.36  
7.34  
7.34  
7.33  
7.31  
7.31  
7.30  
7.30  
7.29  
7.28  
6.80  
6.78  
6.73  
6.71  
5.83  
5.82  
5.80  
5.79  
4.53  
3.86  
3.85  
3.57  
3.56  
3.55  
3.54  
3.52  
3.50  
3.49  
3.48  
3.47  
3.46  
3.45  
3.43  
3.20  
3.19  
3.18  
3.17  
3.16  
3.15  
3.15  
3.14  
2.75  
2.73  
2.71  
2.53  
2.51  
2.49  
2.48  
2.37  
2.35  
2.33  
2.31  
2.11  
2.10

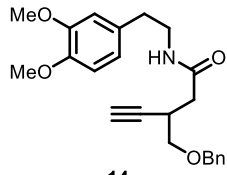

**14**

<sup>1</sup>H NMR (400 MHz, CDCl<sub>3</sub>)

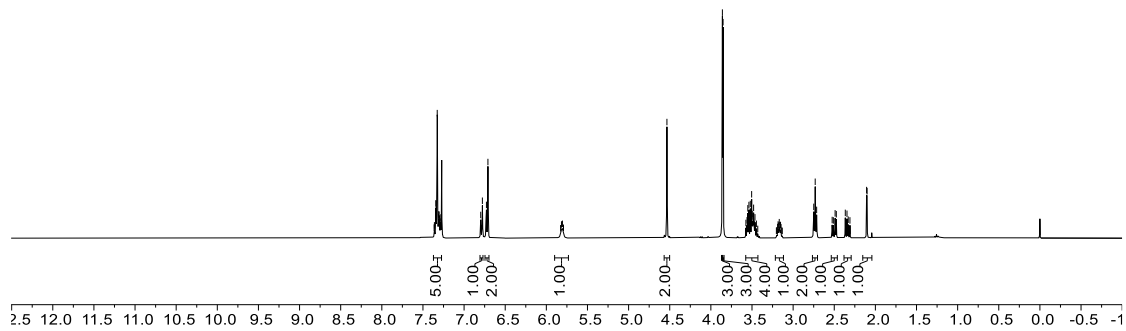

170.1  
148.6  
147.2  
137.6  
131.1  
128.1  
127.4  
127.3  
120.3  
111.6  
111.0  
83.7  
72.7  
71.3  
70.4  
55.6  
55.5  
40.5  
38.4  
34.9  
28.8

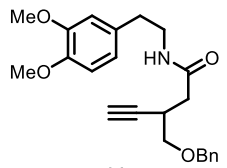

**14**

<sup>13</sup>C NMR (101 MHz, CDCl<sub>3</sub>)

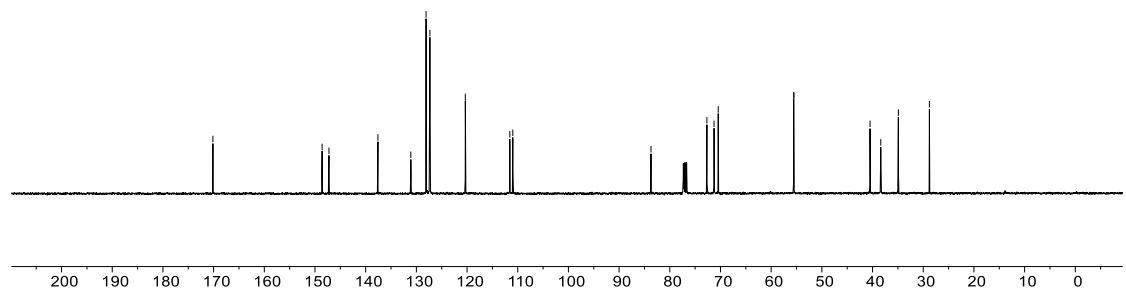

7.36  
7.35  
7.34  
7.34  
7.33  
7.32  
7.31  
7.30  
7.30  
7.29  
7.29  
7.28  
7.28  
6.80  
6.78  
6.73  
6.72  
6.72  
6.71  
6.71  
6.71  
6.70  
5.94  
5.93  
4.51  
4.46  
4.44  
3.86  
3.84  
3.55  
3.54  
3.53  
3.52  
3.49  
3.48  
3.47  
3.46  
3.45  
3.45  
3.44  
3.43  
3.16  
3.15  
3.14  
3.13  
2.75  
2.73  
2.71  
2.51  
2.50  
2.48  
2.46  
2.33  
2.31  
2.29  
2.27  
1.38  
1.37

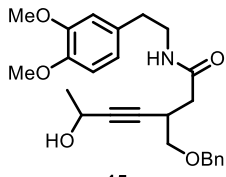

**15**

<sup>1</sup>H NMR (400 MHz, CDCl<sub>3</sub>)

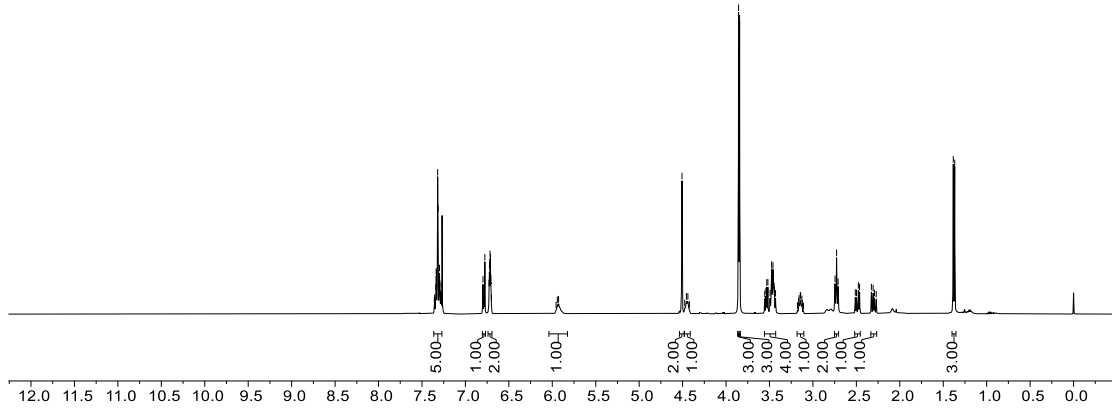

170.7  
149.0  
147.6  
137.8  
131.3  
128.4  
127.7  
127.6  
111.9  
111.3  
85.0  
83.3  
72.9  
71.7  
58.1  
55.9  
55.8  
40.7  
39.0  
35.2  
29.3  
24.4

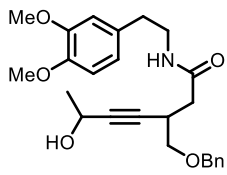

**15**

<sup>13</sup>C NMR (101 MHz, CDCl<sub>3</sub>)

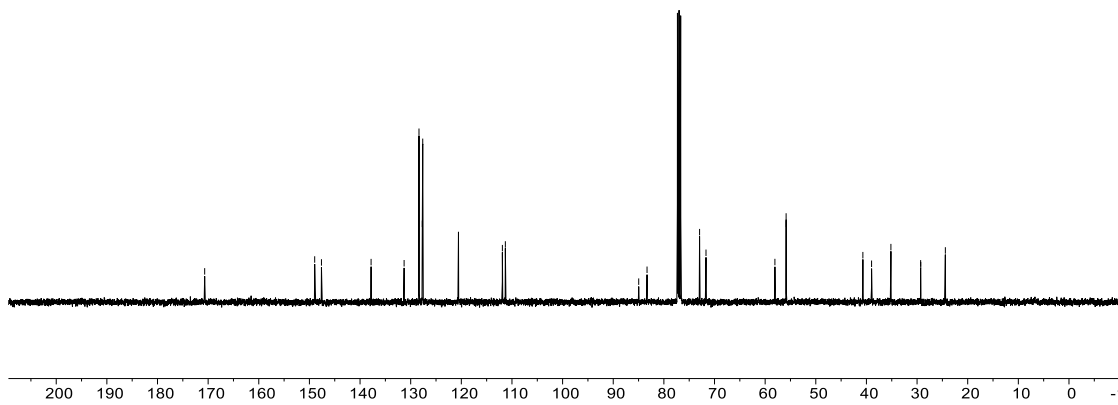



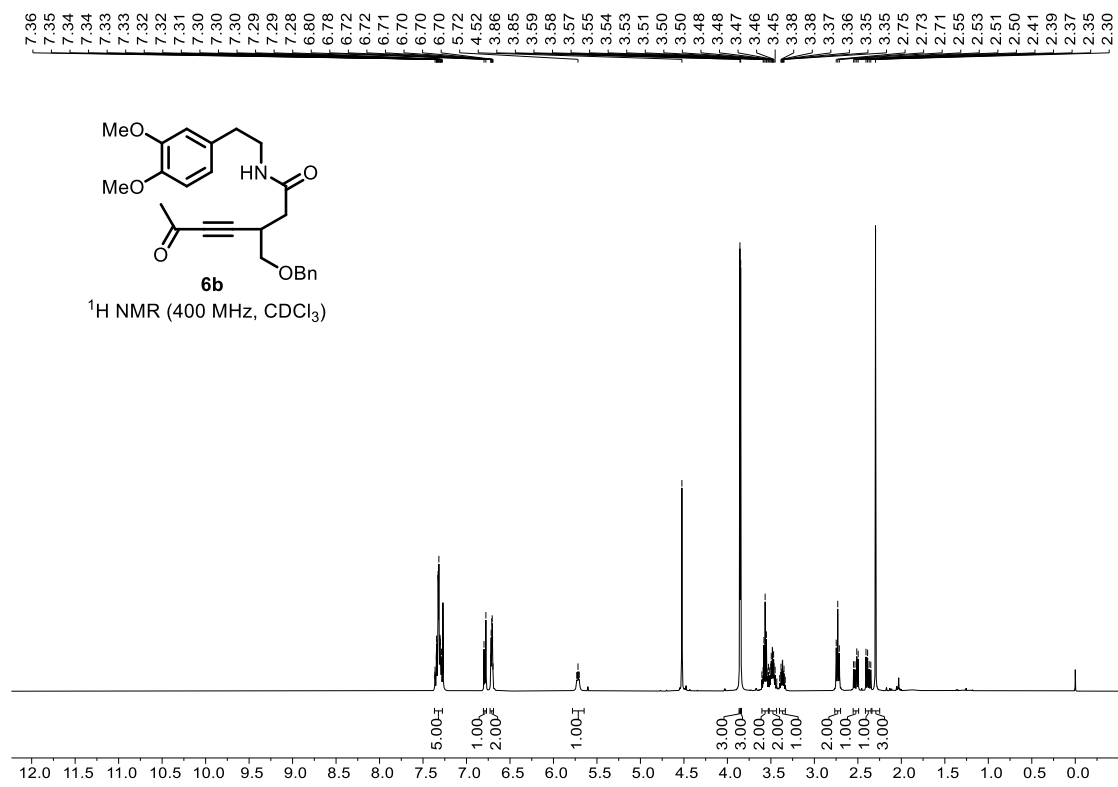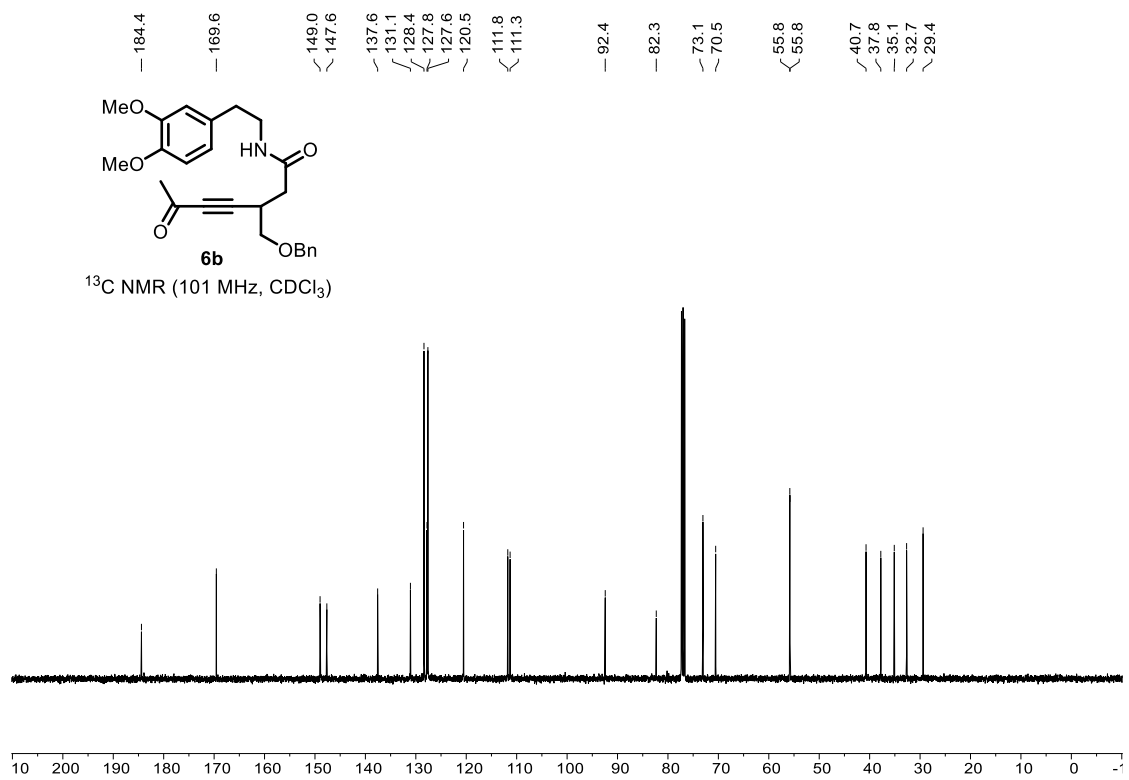

7.33  
7.32  
7.31  
7.30  
7.26  
7.25  
7.24  
6.79  
6.78  
6.73  
6.73  
6.72  
6.72  
5.60  
4.51  
4.49  
4.46  
4.44  
4.07  
4.06  
4.05  
3.88  
3.85  
3.82  
3.81  
3.80  
3.80  
3.79  
3.79  
3.78  
3.69  
3.68  
3.67  
3.67  
3.65  
3.64  
3.64  
3.63  
3.63  
3.62  
3.61  
3.61  
3.56  
3.56  
3.55  
2.77  
2.76  
2.76  
2.75  
2.74  
2.73  
2.73  
2.58  
2.57  
2.18

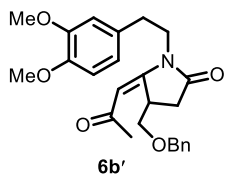

**6b'**  
<sup>1</sup>H NMR (600 MHz, CDCl<sub>3</sub>)

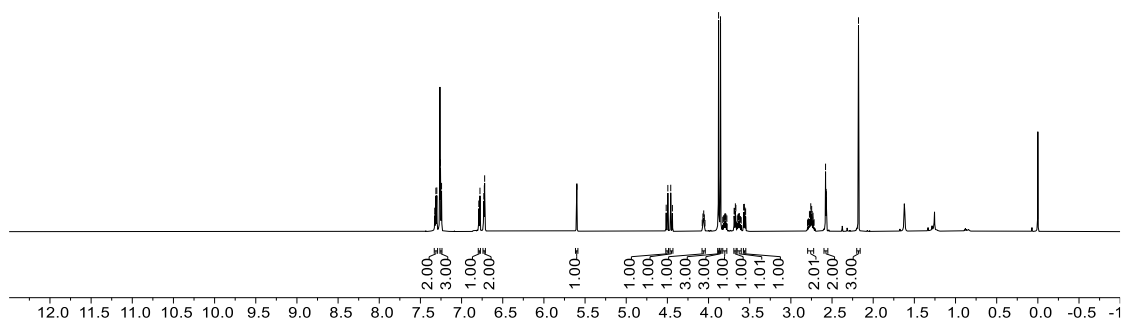

12.0  
11.5  
11.0  
10.5  
10.0  
9.5  
9.0  
8.5  
8.0  
7.5  
7.0  
6.5  
6.0  
5.5  
5.0  
4.5  
4.0  
3.5  
3.0  
2.5  
2.0  
1.5  
1.0  
0.5  
0.0  
-0.5  
-1

186.2  
176.3  
161.0  
149.1  
147.9  
138.0  
130.4  
128.3  
127.6  
127.5  
120.7  
112.0  
111.3  
99.9  
72.9  
71.6  
55.9  
55.9  
41.7  
37.3  
32.6  
32.2  
31.9

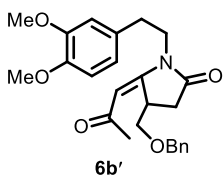

**6b'**  
<sup>13</sup>C NMR (151 MHz, CDCl<sub>3</sub>)

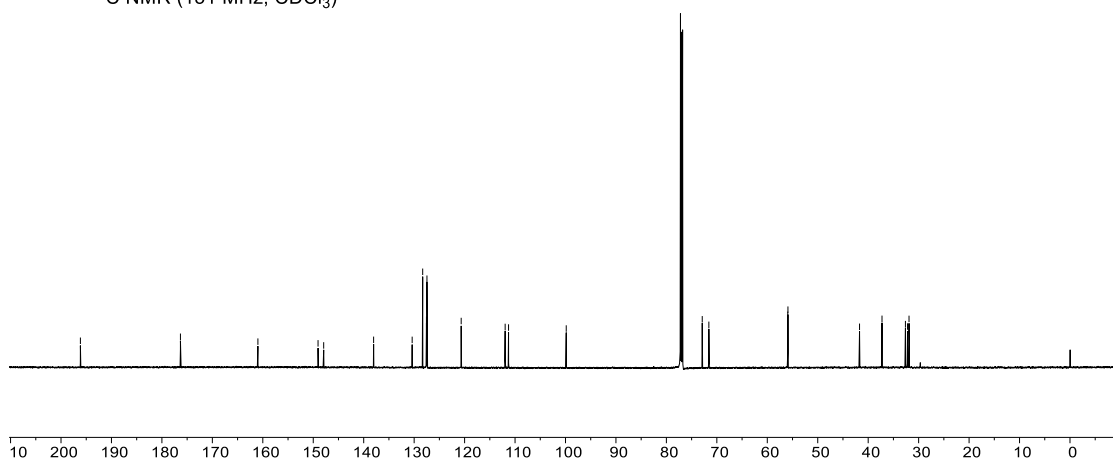

10  
200  
190  
180  
170  
160  
150  
140  
130  
120  
110  
100  
90  
80  
70  
60  
50  
40  
30  
20  
10  
0

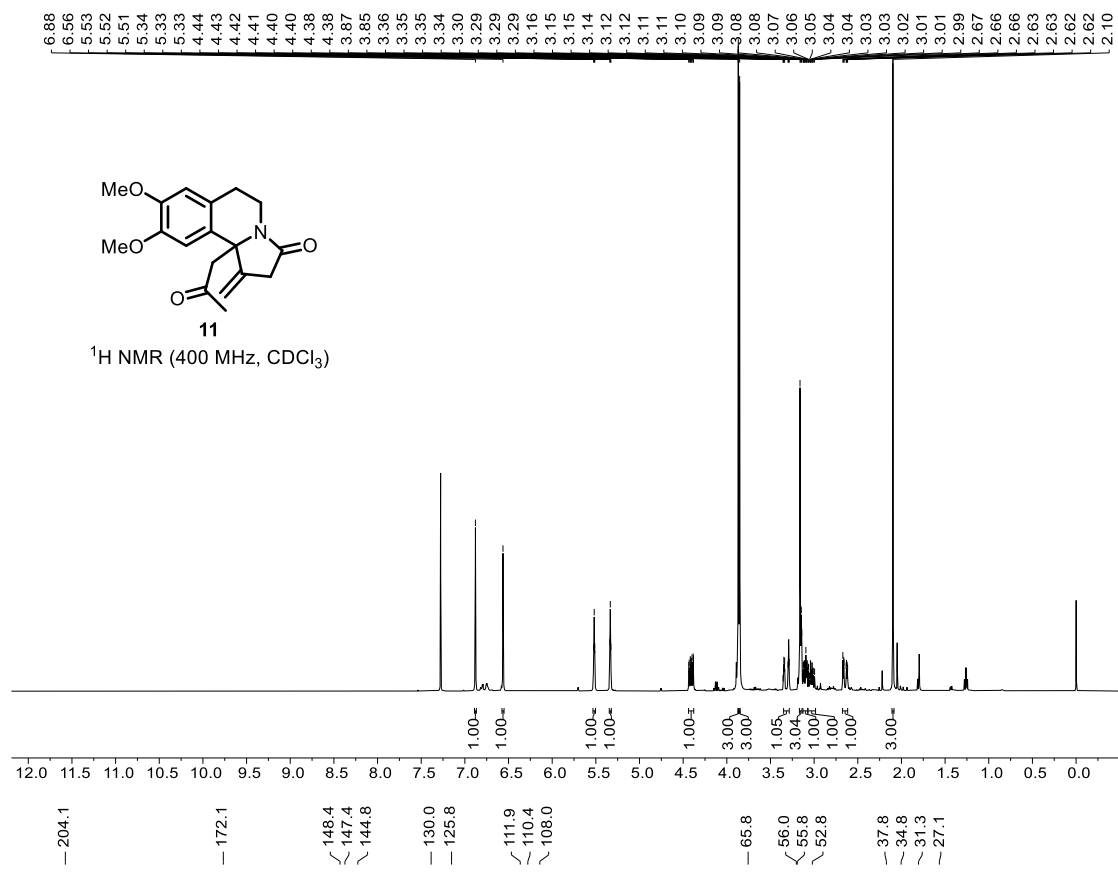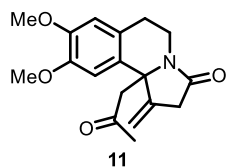

$^1\text{H NMR}$  (400 MHz,  $\text{CDCl}_3$ )

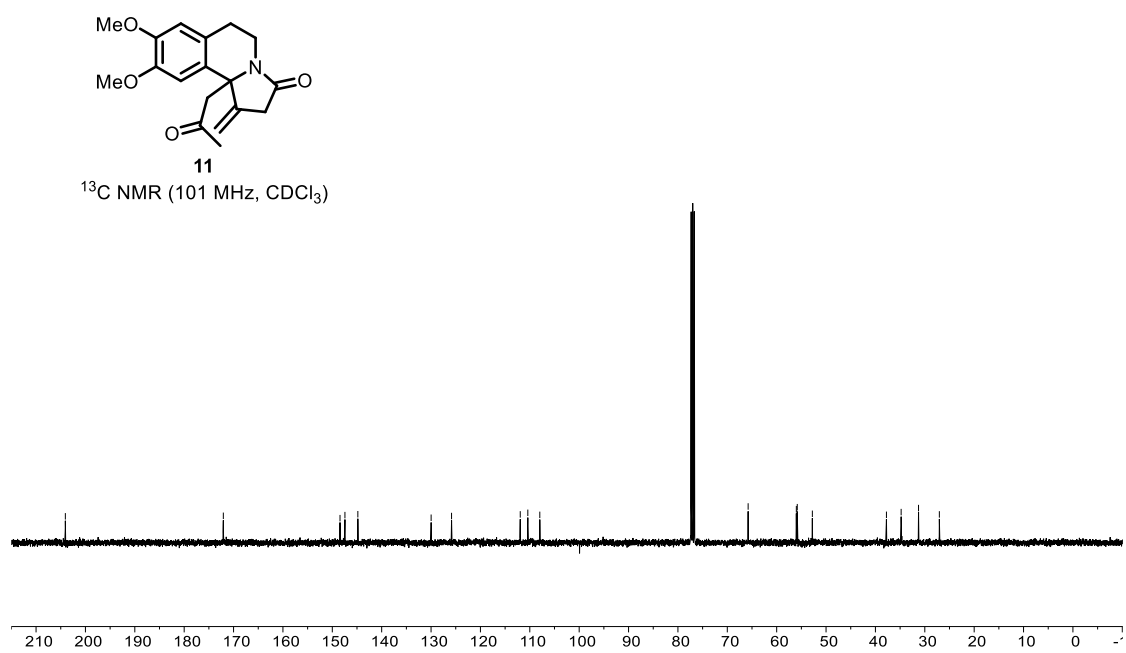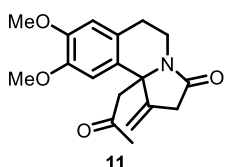

$^{13}\text{C NMR}$  (101 MHz,  $\text{CDCl}_3$ )

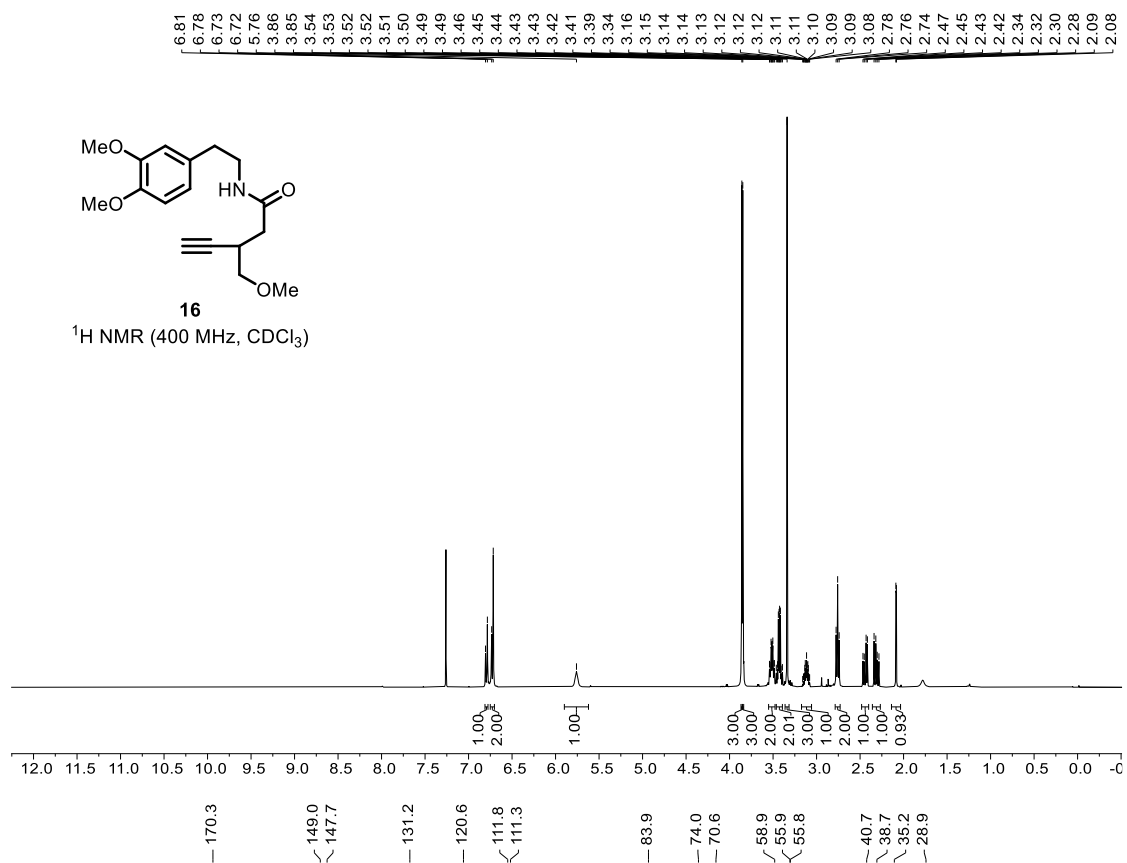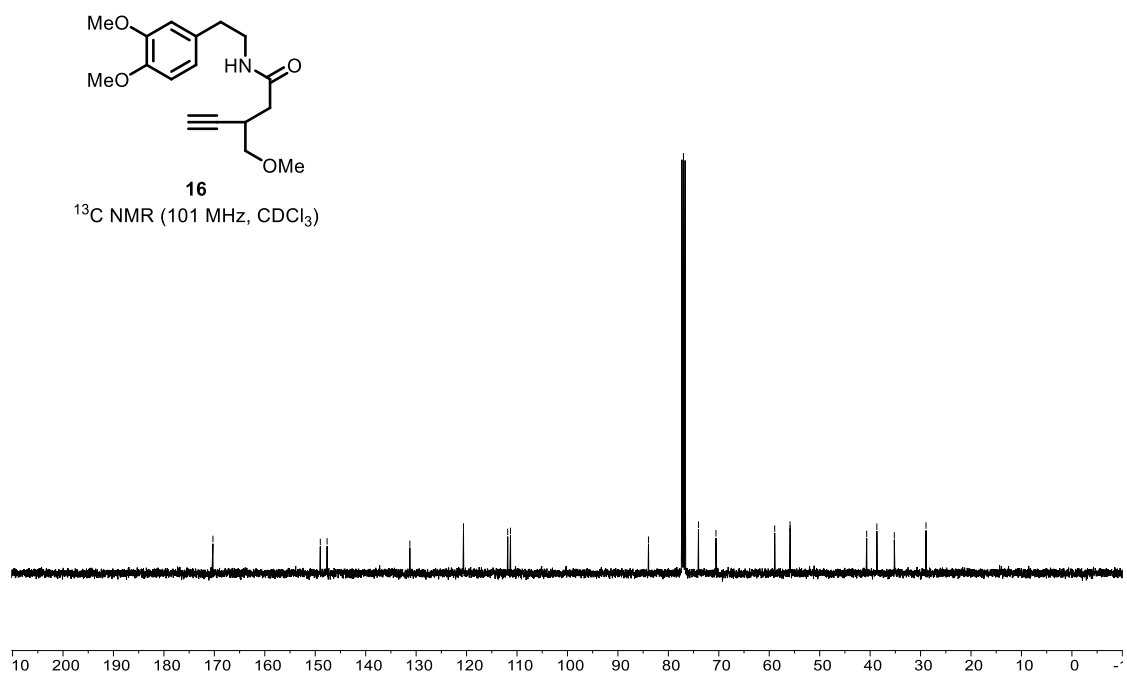

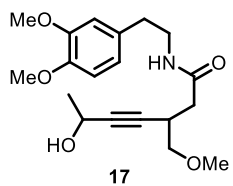

$^1\text{H NMR}$  (400 MHz,  $\text{CDCl}_3$ )

6.81  
6.79  
6.73  
6.72  
4.46  
4.44  
3.86  
3.85  
3.52  
3.50  
3.49  
3.47  
3.43  
3.42  
3.40  
3.38  
3.38  
3.37  
3.36  
3.34  
3.32  
3.12  
3.10  
2.77  
2.76  
2.74  
2.46  
2.44  
2.42  
2.41  
2.30  
2.28  
2.27  
2.25  
1.38  
1.36

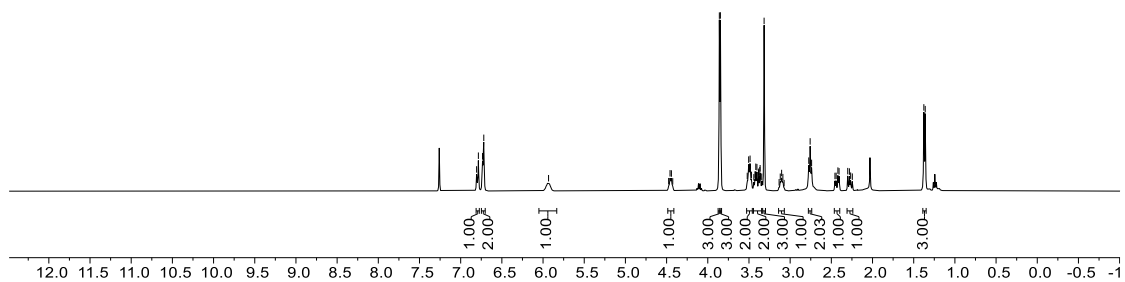

170.7  
149.0  
147.6  
131.3  
120.6  
111.9  
111.3  
84.9  
83.4  
74.2  
58.8  
58.1  
55.9  
55.8  
40.7  
38.9  
35.2  
29.1  
29.1  
24.4

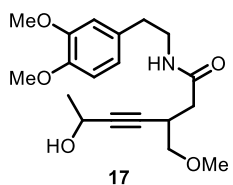

$^{13}\text{C NMR}$  (101 MHz,  $\text{CDCl}_3$ )

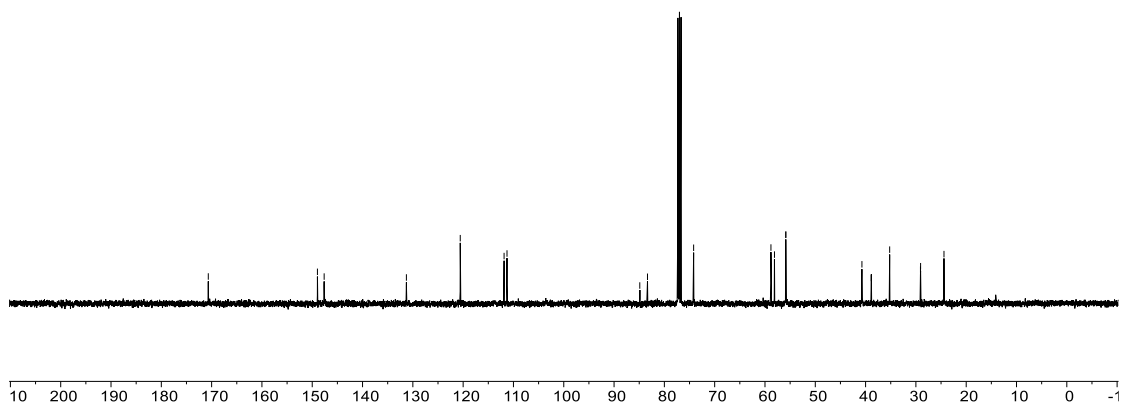

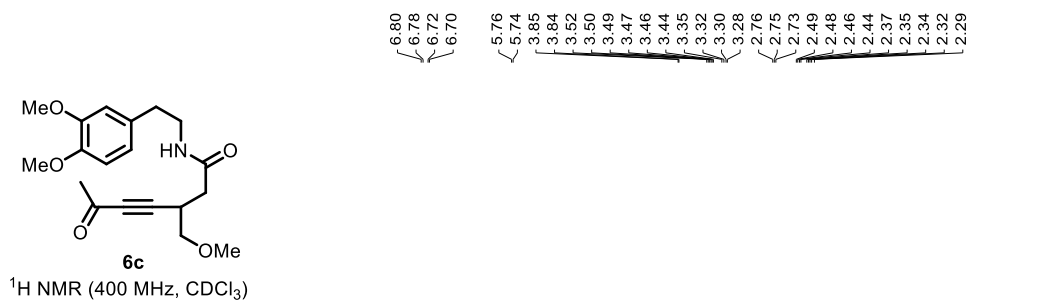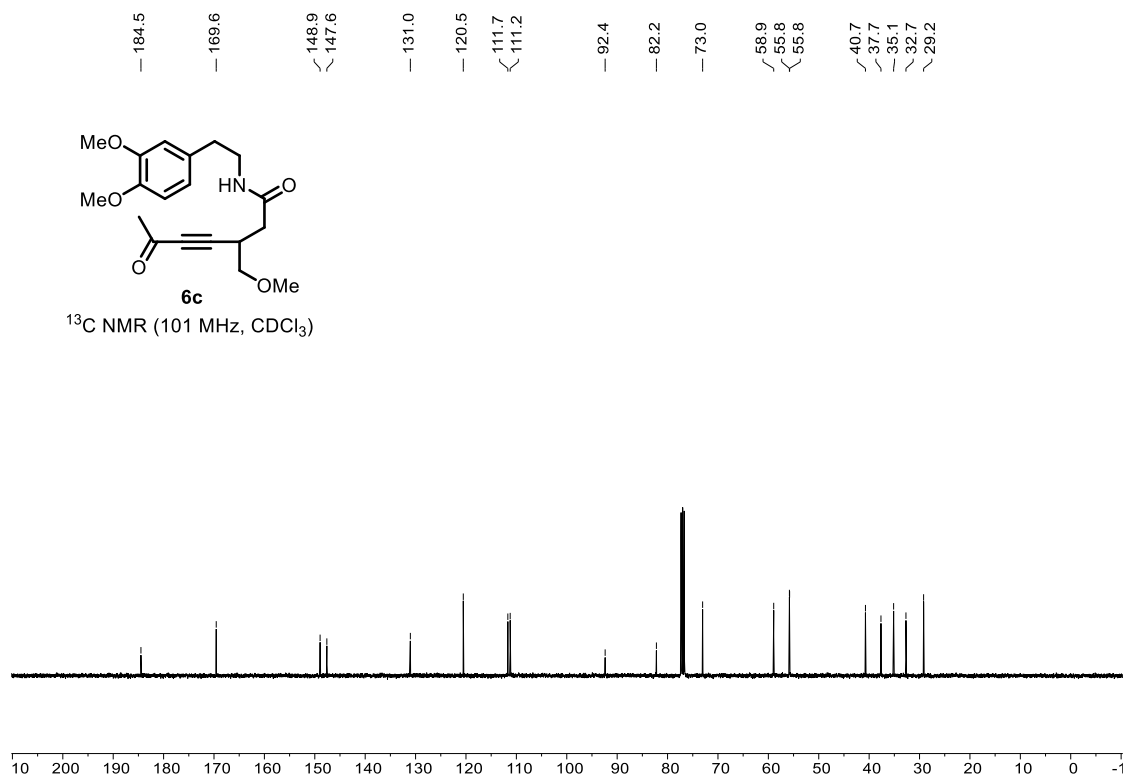

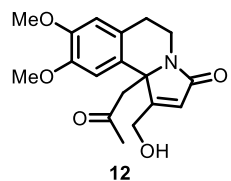

<sup>1</sup>H NMR (400 MHz, CDCl<sub>3</sub>)

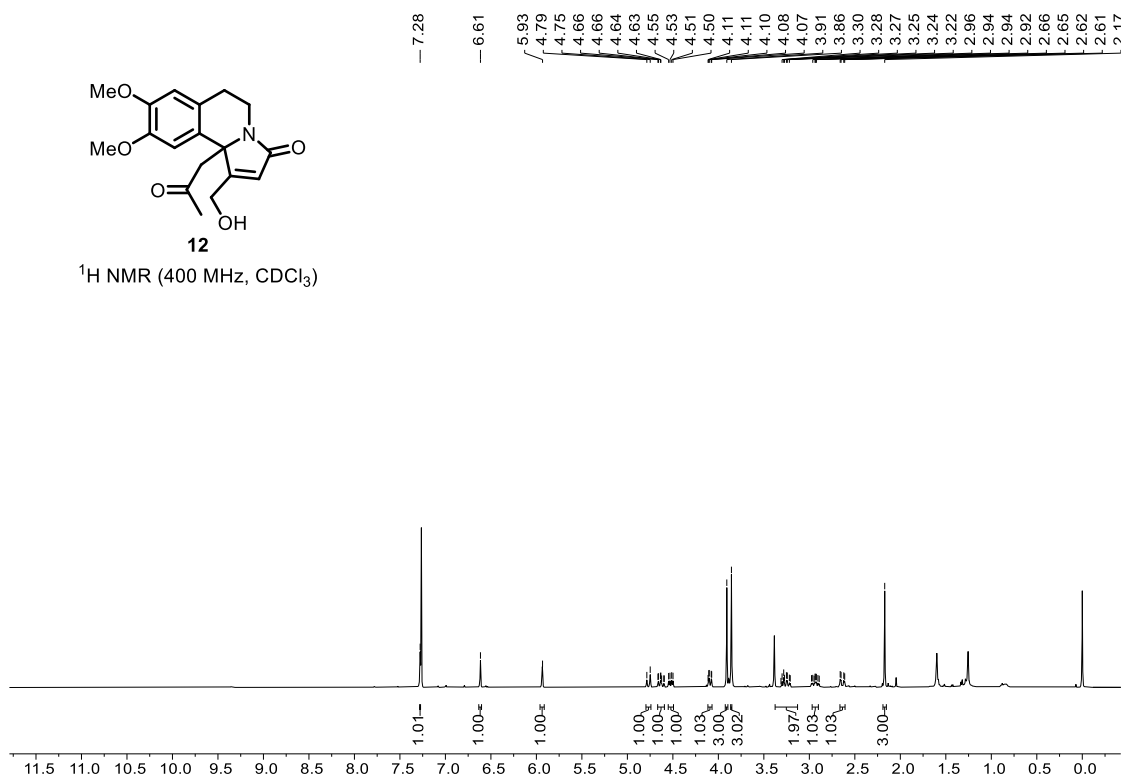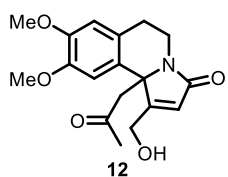

<sup>13</sup>C NMR (101 MHz, CDCl<sub>3</sub>)

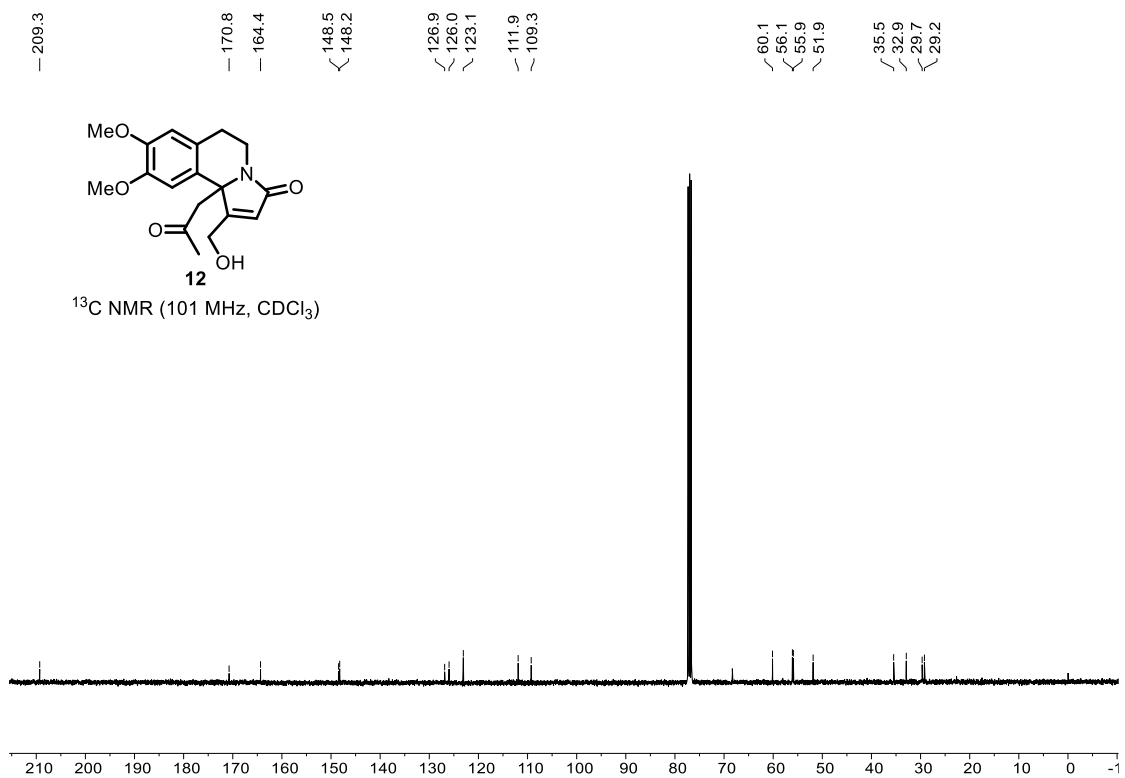

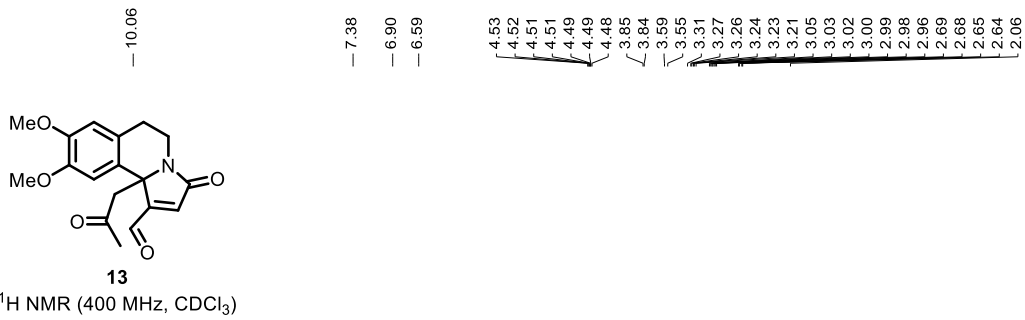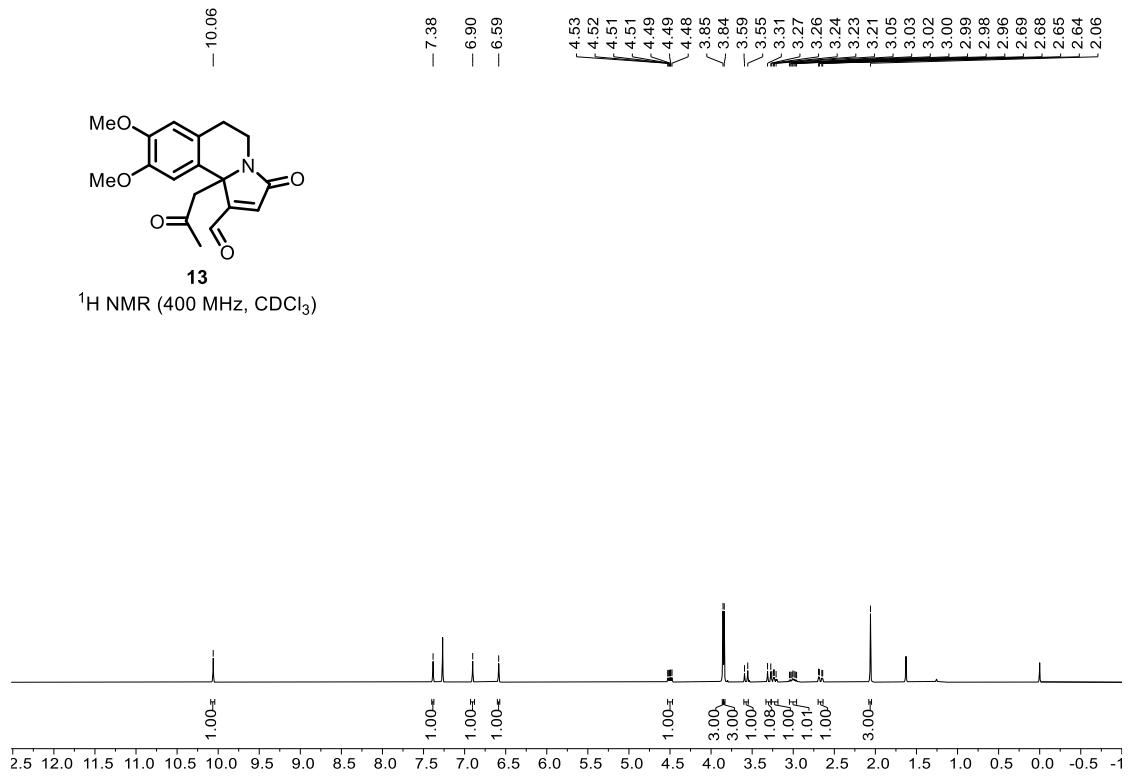

- 203.3
- 188.3
- 168.6
- 157.9
- 148.5
- 147.9
- 140.7
- 126.9
- 125.2
- 111.8
- 110.1
- 66.8
- 55.9
- 55.8
- 49.6
- 35.6
- 31.7
- 28.5

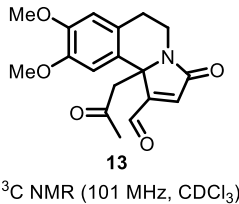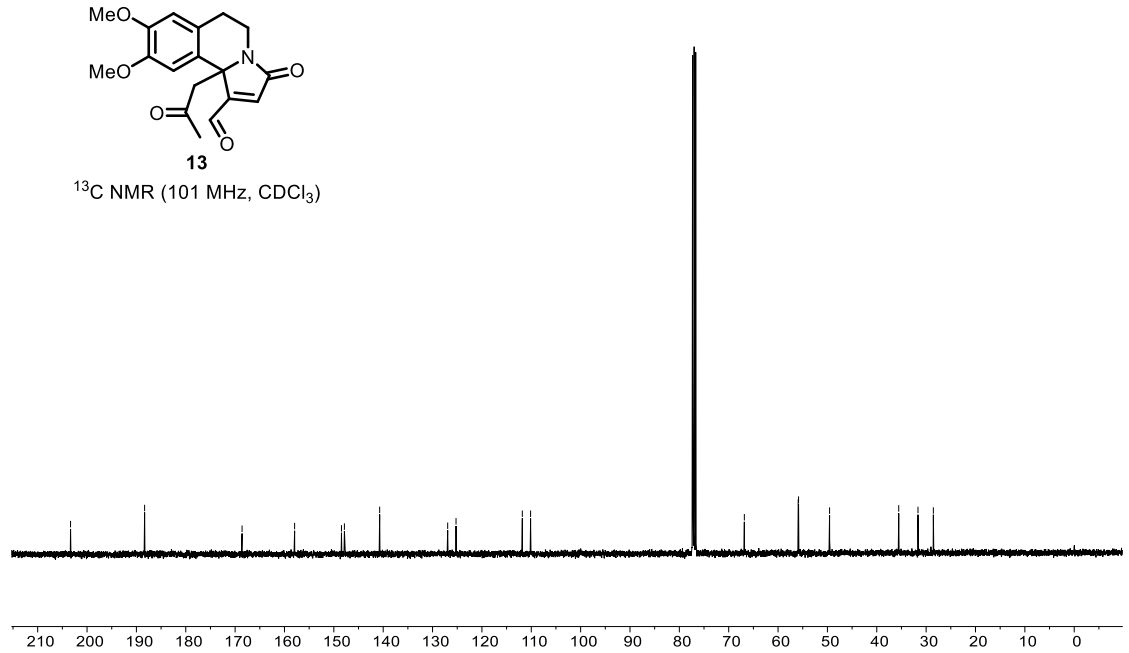

Supplement: d1qo00668a1.pdf [file d1qo00668a1.pdf]
